# Supplementary material
Source: publisher site journal article supplement (https://www.dovepress.com/article/501620)
Supplement: Supplementary file 1 [file get_supplementary_file.php]

Table S1. Causal association of 91 circulating inflammatory proteins with spontaneous abortion, by Inverse Variance Weighted method screening.

| exposure_id | exposure | outcome | method | nsnp | b | se | pval | lo_ci | up_ci | or | or_lci95 | or_uci95 |
| --- | --- | --- | --- | --- | --- | --- | --- | --- | --- | --- | --- | --- |
| GCST90274758 | Eukaryotic translation initiation factor 4E-binding protein 1 | spontaneous abortion | Inverse variance weighted | 18 | 0.042 | 0.043 | 0.334 | -0.043 | 0.127 | 1.043 | 0.958 | 1.136 |
| GCST90274759 | Adenosine Deaminase | spontaneous abortion | Inverse variance weighted | 24 | 0.016 | 0.020 | 0.422 | -0.024 | 0.057 | 1.017 | 0.977 | 1.058 |
| GCST90274760 | Artemin | spontaneous abortion | Inverse variance weighted | 31 | -0.005 | 0.031 | 0.882 | -0.065 | 0.056 | 0.995 | 0.937 | 1.057 |
| GCST90274761 | Axin-1 | spontaneous abortion | Inverse variance weighted | 13 | -0.068 | 0.051 | 0.186 | -0.168 | 0.033 | 0.935 | 0.846 | 1.033 |
| GCST90274762 | beta-nerve growth factor | spontaneous abortion | Inverse variance weighted | 35 | -0.025 | 0.033 | 0.461 | -0.090 | 0.041 | 0.976 | 0.914 | 1.042 |
| GCST90274763 | Caspase 8 | spontaneous abortion | Inverse variance weighted | 23 | -0.049 | 0.035 | 0.162 | -0.119 | 0.020 | 0.952 | 0.888 | 1.020 |
| GCST90274764 | Eotaxin | spontaneous abortion | Inverse variance weighted | 27 | -0.061 | 0.031 | 0.051 | -0.123 | 0.000 | 0.941 | 0.885 | 1.000 |
| GCST90274765 | C-C motif chemokine 19 | spontaneous abortion | Inverse variance weighted | 36 | -0.008 | 0.023 | 0.731 | -0.053 | 0.037 | 0.992 | 0.948 | 1.038 |
| GCST90274766 | C-C motif chemokine 20 | spontaneous abortion | Inverse variance weighted | 33 | -0.008 | 0.034 | 0.804 | -0.075 | 0.058 | 0.992 | 0.928 | 1.060 |
| GCST90274767 | C-C motif chemokine 23 | spontaneous abortion | Inverse variance weighted | 30 | 0.002 | 0.029 | 0.949 | -0.055 | 0.059 | 1.002 | 0.946 | 1.061 |
| GCST90274768 | C-C motif chemokine 25 | spontaneous abortion | Inverse variance weighted | 35 | -0.025 | 0.015 | 0.101 | -0.054 | 0.005 | 0.976 | 0.948 | 1.005 |
| GCST90274769 | C-C motif chemokine 28 | spontaneous abortion | Inverse variance weighted | 37 | 0.014 | 0.037 | 0.702 | -0.059 | 0.087 | 1.014 | 0.943 | 1.091 |
| GCST90274770 | C-C motif chemokine 4 | spontaneous abortion | Inverse variance weighted | 31 | -0.020 | 0.019 | 0.304 | -0.058 | 0.018 | 0.980 | 0.944 | 1.018 |
| GCST90274771 | Natural killer cell receptor 2B4 | spontaneous abortion | Inverse variance weighted | 33 | 0.022 | 0.031 | 0.489 | -0.040 | 0.083 | 1.022 | 0.961 | 1.086 |
| GCST90274772 | CD40L receptor | spontaneous abortion | Inverse variance weighted | 23 | -0.009 | 0.024 | 0.705 | -0.056 | 0.038 | 0.991 | 0.945 | 1.039 |
| GCST90274773 | T-cell surface glycoprotein CD5 | spontaneous abortion | Inverse variance weighted | 29 | 0.041 | 0.033 | 0.202 | -0.022 | 0.105 | 1.042 | 0.978 | 1.111 |
| GCST90274774 | T-cell surface glycoprotein CD6 isoform | spontaneous abortion | Inverse variance weighted | 24 | 0.018 | 0.019 | 0.335 | -0.019 | 0.056 | 1.019 | 0.981 | 1.057 |
| GCST90274775 | CUB domain-containing protein 1 | spontaneous abortion | Inverse variance weighted | 35 | -0.040 | 0.023 | 0.090 | -0.086 | 0.006 | 0.961 | 0.918 | 1.006 |
| GCST90274776 | Macrophage colony-stimulating factor 1 | spontaneous abortion | Inverse variance weighted | 28 | 0.047 | 0.036 | 0.194 | -0.024 | 0.117 | 1.048 | 0.977 | 1.124 |
| GCST90274777 | Cystatin D | spontaneous abortion | Inverse variance weighted | 46 | -0.017 | 0.018 | 0.348 | -0.053 | 0.019 | 0.983 | 0.948 | 1.019 |
| GCST90274778 | Fractalkine | spontaneous abortion | Inverse variance weighted | 30 | -0.008 | 0.042 | 0.848 | -0.090 | 0.074 | 0.992 | 0.914 | 1.077 |
| GCST90274779 | C-X-C motif chemokine 1 | spontaneous abortion | Inverse variance weighted | 24 | 0.019 | 0.030 | 0.523 | -0.040 | 0.079 | 1.019 | 0.961 | 1.082 |
| GCST90274780 | C-X-C motif chemokine 10 | spontaneous abortion | Inverse variance weighted | 33 | 0.015 | 0.029 | 0.616 | -0.043 | 0.072 | 1.015 | 0.958 | 1.074 |
| GCST90274781 | C-X-C motif chemokine 11 | spontaneous abortion | Inverse variance weighted | 38 | -0.006 | 0.029 | 0.843 | -0.063 | 0.051 | 0.994 | 0.939 | 1.053 |
| GCST90274782 | C-X-C motif chemokine 5 | spontaneous abortion | Inverse variance weighted | 21 | -0.004 | 0.031 | 0.888 | -0.065 | 0.057 | 0.996 | 0.937 | 1.058 |
| GCST90274783 | C-X-C motif chemokine 6 | spontaneous abortion | Inverse variance weighted | 25 | 0.010 | 0.024 | 0.668 | -0.036 | 0.056 | 1.010 | 0.964 | 1.058 |
| GCST90274784 | C-X-C motif chemokine 9 | spontaneous abortion | Inverse variance weighted | 37 | 0.013 | 0.031 | 0.688 | -0.049 | 0.074 | 1.013 | 0.952 | 1.077 |
| GCST90274785 | Delta and Notch-like epidermal growth factor-related receptor | spontaneous abortion | Inverse variance weighted | 28 | 0.008 | 0.036 | 0.829 | -0.063 | 0.079 | 1.008 | 0.939 | 1.082 |
| GCST90274786 | Protein S100-A12 | spontaneous abortion | Inverse variance weighted | 24 | -0.050 | 0.033 | 0.133 | -0.115 | 0.015 | 0.951 | 0.891 | 1.015 |
| GCST90274787 | Fibroblast growth factor 19 | spontaneous abortion | Inverse variance weighted | 33 | 0.024 | 0.033 | 0.467 | -0.041 | 0.089 | 1.024 | 0.960 | 1.093 |
| GCST90274788 | Fibroblast growth factor 21 | spontaneous abortion | Inverse variance weighted | 24 | 0.033 | 0.032 | 0.302 | -0.030 | 0.096 | 1.034 | 0.971 | 1.100 |
| GCST90274789 | Fibroblast growth factor 23 | spontaneous abortion | Inverse variance weighted | 28 | -0.024 | 0.036 | 0.493 | -0.094 | 0.045 | 0.976 | 0.910 | 1.046 |
| GCST90274790 | Fibroblast growth factor 5 | spontaneous abortion | Inverse variance weighted | 32 | 0.004 | 0.019 | 0.830 | -0.033 | 0.042 | 1.004 | 0.967 | 1.042 |
| GCST90274791 | Fms-related tyrosine kinase 3 ligand | spontaneous abortion | Inverse variance weighted | 45 | -0.002 | 0.026 | 0.929 | -0.053 | 0.048 | 0.998 | 0.949 | 1.049 |
| GCST90274792 | Glial cell line-derived neurotrophic factor | spontaneous abortion | Inverse variance weighted | 24 | -0.004 | 0.035 | 0.903 | -0.072 | 0.064 | 0.996 | 0.931 | 1.066 |
| GCST90274793 | Hepatocyte growth factor | spontaneous abortion | Inverse variance weighted | 29 | -0.060 | 0.046 | 0.191 | -0.150 | 0.030 | 0.942 | 0.861 | 1.030 |
| GCST90274794 | Interferon gamma | spontaneous abortion | Inverse variance weighted | 19 | -0.011 | 0.035 | 0.755 | -0.080 | 0.058 | 0.989 | 0.923 | 1.060 |
| GCST90274795 | Interleukin-10 | spontaneous abortion | Inverse variance weighted | 33 | 0.030 | 0.027 | 0.267 | -0.023 | 0.084 | 1.031 | 0.977 | 1.087 |
| GCST90274796 | Interleukin-10 receptor subunit alpha | spontaneous abortion | Inverse variance weighted | 19 | 0.013 | 0.035 | 0.705 | -0.055 | 0.081 | 1.013 | 0.946 | 1.085 |
| GCST90274797 | Interleukin-10 receptor subunit beta | spontaneous abortion | Inverse variance weighted | 29 | -0.030 | 0.022 | 0.179 | -0.073 | 0.014 | 0.971 | 0.930 | 1.014 |
| GCST90274798 | Interleukin-12 subunit beta | spontaneous abortion | Inverse variance weighted | 37 | -0.022 | 0.019 | 0.264 | -0.059 | 0.016 | 0.979 | 0.942 | 1.016 |
| GCST90274799 | Interleukin-13 | spontaneous abortion | Inverse variance weighted | 25 | -0.025 | 0.029 | 0.393 | -0.083 | 0.032 | 0.975 | 0.921 | 1.033 |
| GCST90274800 | Interleukin-15 receptor subunit alpha | spontaneous abortion | Inverse variance weighted | 25 | -0.003 | 0.021 | 0.899 | -0.044 | 0.039 | 0.997 | 0.957 | 1.039 |
| GCST90274801 | Interleukin-17A | spontaneous abortion | Inverse variance weighted | 19 | -0.010 | 0.038 | 0.802 | -0.084 | 0.065 | 0.991 | 0.920 | 1.067 |
| GCST90274802 | Interleukin-17C | spontaneous abortion | Inverse variance weighted | 33 | 0.015 | 0.031 | 0.641 | -0.047 | 0.076 | 1.015 | 0.954 | 1.079 |
| GCST90274803 | Interleukin-18 | spontaneous abortion | Inverse variance weighted | 31 | -0.012 | 0.027 | 0.667 | -0.066 | 0.042 | 0.988 | 0.937 | 1.043 |
| GCST90274804 | interleukin-18 receptor 1 | spontaneous abortion | Inverse variance weighted | 38 | -0.010 | 0.016 | 0.528 | -0.042 | 0.022 | 0.990 | 0.959 | 1.022 |
| GCST90274805 | Interleukin-1-alpha | spontaneous abortion | Inverse variance weighted | 22 | -0.022 | 0.041 | 0.586 | -0.102 | 0.058 | 0.978 | 0.903 | 1.059 |
| GCST90274806 | Interleukin-2 | spontaneous abortion | Inverse variance weighted | 22 | -0.038 | 0.043 | 0.371 | -0.122 | 0.045 | 0.963 | 0.886 | 1.046 |
| GCST90274807 | Interleukin-20 levels | spontaneous abortion | Inverse variance weighted | 23 | -0.038 | 0.038 | 0.312 | -0.113 | 0.036 | 0.962 | 0.893 | 1.037 |
| GCST90274808 | Interleukin-20 receptor subunit alpha | spontaneous abortion | Inverse variance weighted | 20 | -0.067 | 0.040 | 0.094 | -0.145 | 0.011 | 0.936 | 0.865 | 1.011 |
| GCST90274809 | Interleukin-22 receptor subunit alpha-1 | spontaneous abortion | Inverse variance weighted | 21 | -0.005 | 0.044 | 0.910 | -0.091 | 0.081 | 0.995 | 0.913 | 1.085 |
| GCST90274810 | Interleukin-24 | spontaneous abortion | Inverse variance weighted | 17 | 0.021 | 0.050 | 0.679 | -0.077 | 0.118 | 1.021 | 0.926 | 1.125 |
| GCST90274811 | Interleukin-2 receptor subunit beta | spontaneous abortion | Inverse variance weighted | 24 | -0.056 | 0.033 | 0.091 | -0.122 | 0.009 | 0.945 | 0.886 | 1.009 |
| GCST90274812 | Interleukin-33 | spontaneous abortion | Inverse variance weighted | 23 | -0.026 | 0.037 | 0.477 | -0.098 | 0.046 | 0.974 | 0.907 | 1.047 |
| GCST90274813 | Interleukin-4 | spontaneous abortion | Inverse variance weighted | 21 | -0.063 | 0.039 | 0.103 | -0.139 | 0.013 | 0.939 | 0.871 | 1.013 |
| GCST90274814 | Interleukin-5 | spontaneous abortion | Inverse variance weighted | 24 | 0.029 | 0.033 | 0.385 | -0.036 | 0.094 | 1.029 | 0.964 | 1.099 |
| GCST90274815 | Interleukin-6 | spontaneous abortion | Inverse variance weighted | 13 | 0.004 | 0.044 | 0.934 | -0.083 | 0.090 | 1.004 | 0.920 | 1.095 |
| GCST90274816 | Interleukin-7 | spontaneous abortion | Inverse variance weighted | 22 | 0.025 | 0.055 | 0.647 | -0.083 | 0.133 | 1.026 | 0.920 | 1.143 |
| GCST90274817 | Interleukin-8 | spontaneous abortion | Inverse variance weighted | 31 | 0.018 | 0.032 | 0.572 | -0.044 | 0.080 | 1.018 | 0.956 | 1.084 |
| GCST90274818 | Latency-associated peptide transforming growth factor beta 1 | spontaneous abortion | Inverse variance weighted | 32 | 0.046 | 0.030 | 0.118 | -0.012 | 0.104 | 1.047 | 0.988 | 1.110 |
| GCST90274819 | Leukemia inhibitory factor | spontaneous abortion | Inverse variance weighted | 26 | 0.014 | 0.034 | 0.684 | -0.053 | 0.080 | 1.014 | 0.949 | 1.084 |
| GCST90274820 | Leukemia inhibitory factor receptor | spontaneous abortion | Inverse variance weighted | 27 | -0.004 | 0.026 | 0.872 | -0.056 | 0.047 | 0.996 | 0.946 | 1.049 |
| GCST90274821 | Monocyte chemoattractant protein-1 | spontaneous abortion | Inverse variance weighted | 30 | 0.002 | 0.024 | 0.946 | -0.046 | 0.049 | 1.002 | 0.955 | 1.050 |
| GCST90274822 | Monocyte chemoattractant protein 2 | spontaneous abortion | Inverse variance weighted | 42 | 0.013 | 0.014 | 0.342 | -0.014 | 0.041 | 1.013 | 0.986 | 1.041 |
| GCST90274823 | Monocyte chemoattractant protein-3 | spontaneous abortion | Inverse variance weighted | 26 | 0.051 | 0.030 | 0.096 | -0.009 | 0.110 | 1.052 | 0.991 | 1.117 |
| GCST90274824 | Monocyte chemoattractant protein-4 | spontaneous abortion | Inverse variance weighted | 27 | 0.012 | 0.032 | 0.720 | -0.052 | 0.075 | 1.012 | 0.950 | 1.078 |
| GCST90274825 | Macrophage inflammatory protein 1a | spontaneous abortion | Inverse variance weighted | 20 | 0.029 | 0.027 | 0.285 | -0.024 | 0.081 | 1.029 | 0.976 | 1.084 |
| GCST90274826 | Matrix metalloproteinase-1 | spontaneous abortion | Inverse variance weighted | 26 | 0.030 | 0.031 | 0.327 | -0.030 | 0.091 | 1.031 | 0.970 | 1.095 |
| GCST90274827 | Matrix metalloproteinase-10 | spontaneous abortion | Inverse variance weighted | 24 | -0.047 | 0.029 | 0.109 | -0.104 | 0.010 | 0.954 | 0.902 | 1.010 |
| GCST90274828 | Neurturin | spontaneous abortion | Inverse variance weighted | 26 | 0.017 | 0.030 | 0.579 | -0.042 | 0.075 | 1.017 | 0.959 | 1.078 |
| GCST90274829 | Neurotrophin-3 | spontaneous abortion | Inverse variance weighted | 31 | -0.042 | 0.040 | 0.291 | -0.120 | 0.036 | 0.959 | 0.887 | 1.037 |
| GCST90274830 | Osteoprotegerin | spontaneous abortion | Inverse variance weighted | 27 | -0.047 | 0.032 | 0.141 | -0.109 | 0.015 | 0.954 | 0.897 | 1.016 |
| GCST90274831 | Oncostatin-M | spontaneous abortion | Inverse variance weighted | 23 | 0.024 | 0.034 | 0.485 | -0.044 | 0.092 | 1.024 | 0.957 | 1.096 |
| GCST90274832 | Programmed cell death 1 ligand 1 | spontaneous abortion | Inverse variance weighted | 24 | -0.083 | 0.035 | 0.019 | -0.153 | -0.014 | 0.920 | 0.858 | 0.986 |
| GCST90274833 | Stem cell factor | spontaneous abortion | Inverse variance weighted | 42 | 0.012 | 0.025 | 0.630 | -0.037 | 0.061 | 1.012 | 0.964 | 1.063 |
| GCST90274834 | SIR2-like protein 2 | spontaneous abortion | Inverse variance weighted | 19 | 0.027 | 0.039 | 0.488 | -0.050 | 0.104 | 1.028 | 0.952 | 1.110 |
| GCST90274835 | Signaling lymphocytic activation molecule | spontaneous abortion | Inverse variance weighted | 35 | -0.038 | 0.030 | 0.204 | -0.096 | 0.020 | 0.963 | 0.908 | 1.021 |
| GCST90274836 | Sulfotransferase 1A1 | spontaneous abortion | Inverse variance weighted | 34 | 0.015 | 0.024 | 0.534 | -0.033 | 0.063 | 1.015 | 0.968 | 1.065 |
| GCST90274837 | STAM binding protein | spontaneous abortion | Inverse variance weighted | 20 | -0.006 | 0.051 | 0.900 | -0.106 | 0.093 | 0.994 | 0.899 | 1.098 |
| GCST90274838 | Transforming growth factor-alpha | spontaneous abortion | Inverse variance weighted | 27 | 0.048 | 0.035 | 0.172 | -0.021 | 0.117 | 1.049 | 0.979 | 1.124 |
| GCST90274839 | Tumor necrosis factor | spontaneous abortion | Inverse variance weighted | 29 | 0.004 | 0.031 | 0.908 | -0.057 | 0.064 | 1.004 | 0.945 | 1.066 |
| GCST90274840 | TNF-beta | spontaneous abortion | Inverse variance weighted | 37 | -0.036 | 0.016 | 0.026 | -0.068 | -0.004 | 0.965 | 0.935 | 0.996 |
| GCST90274841 | Tumor necrosis factor receptor superfamily member 9 | spontaneous abortion | Inverse variance weighted | 34 | 0.023 | 0.030 | 0.456 | -0.037 | 0.082 | 1.023 | 0.964 | 1.085 |
| GCST90274842 | Tumor necrosis factor ligand superfamily member 14 | spontaneous abortion | Inverse variance weighted | 35 | -0.032 | 0.029 | 0.271 | -0.088 | 0.025 | 0.969 | 0.916 | 1.025 |
| GCST90274843 | TNF-related apoptosis-inducing ligand | spontaneous abortion | Inverse variance weighted | 36 | 0.006 | 0.019 | 0.744 | -0.032 | 0.044 | 1.006 | 0.969 | 1.045 |
| GCST90274844 | TNF-related activation-induced cytokine | spontaneous abortion | Inverse variance weighted | 47 | -0.017 | 0.023 | 0.466 | -0.061 | 0.028 | 0.983 | 0.940 | 1.029 |
| GCST90274845 | Thymic stromal lymphopoietin | spontaneous abortion | Inverse variance weighted | 22 | 0.024 | 0.042 | 0.573 | -0.059 | 0.107 | 1.024 | 0.943 | 1.113 |
| GCST90274846 | Tumor necrosis factor ligand superfamily member 12 | spontaneous abortion | Inverse variance weighted | 43 | 0.018 | 0.026 | 0.481 | -0.032 | 0.068 | 1.018 | 0.968 | 1.070 |
| GCST90274847 | Urokinase-type plasminogen activator | spontaneous abortion | Inverse variance weighted | 41 | 0.021 | 0.025 | 0.413 | -0.029 | 0.071 | 1.021 | 0.971 | 1.073 |
| GCST90274848 | Vascular endothelial growth factor A | spontaneous abortion | Inverse variance weighted | 18 | 0.042 | 0.043 | 0.334 | -0.043 | 0.127 | 1.043 | 0.958 | 1.136 |

Table S2. Reverse mendelian randomization estimates the causal link between spontaneous abortion and the 2 circulating infammatory proteins.

| id.exposure | exposure | outcome | method | nsnp | pval | or | or_lci95 | or_uci95 | Q | Q_pval | egger_intercept | Pleiotropy_pval | MR_PRESSO  Global Test pval |
| --- | --- | --- | --- | --- | --- | --- | --- | --- | --- | --- | --- | --- | --- |
| finngen_R10_O15_ABORT_SPONTAN | spontaneous abortion | Programmed cell death 1 ligand 1 | MR Egger | 8 | 0.894 | 0.972 | 0.652 | 1.450 | 2.620 | 0.855 |  |  |  |
| finngen_R10_O15_ABORT_SPONTAN | spontaneous abortion | Programmed cell death 1 ligand 1 | Weighted median | 8 | 0.500 | 0.934 | 0.766 | 1.139 |  |  |  |  |  |
| finngen_R10_O15_ABORT_SPONTAN | spontaneous abortion | Programmed cell death 1 ligand 1 | Inverse variance weighted | 8 | 0.648 | 0.965 | 0.827 | 1.125 | 2.622 | 0.918 | -0.0007 | 0.969 | 0.921 |
| finngen_R10_O15_ABORT_SPONTAN | spontaneous abortion | Programmed cell death 1 ligand 1 | Simple mode | 8 | 0.633 | 0.936 | 0.722 | 1.213 |  |  |  |  |  |
| finngen_R10_O15_ABORT_SPONTAN | spontaneous abortion | Programmed cell death 1 ligand 1 | Weighted mode | 8 | 0.597 | 0.928 | 0.711 | 1.210 |  |  |  |  |  |
| finngen_R10_O15_ABORT_SPONTAN | spontaneous abortion | TNF-β | MR Egger | 6 | 0.861 | 1.053 | 0.613 | 1.808 | 0.782 | 0.941 |  |  |  |
| finngen_R10_O15_ABORT_SPONTAN | spontaneous abortion | TNF-β | Weighted median | 6 | 0.236 | 0.867 | 0.685 | 1.098 |  |  |  |  |  |
| finngen_R10_O15_ABORT_SPONTAN | spontaneous abortion | TNF-β | Inverse variance weighted | 6 | 0.268 | 0.896 | 0.737 | 1.089 | 1.177 | 0.947 | -0.013 | 0.564 | 0.943 |
| finngen_R10_O15_ABORT_SPONTAN | spontaneous abortion | TNF-β | Simple mode | 6 | 0.403 | 0.859 | 0.620 | 1.190 |  |  |  |  |  |
| finngen_R10_O15_ABORT_SPONTAN | spontaneous abortion | TNF-β | Weighted mode | 6 | 0.378 | 0.857 | 0.626 | 1.172 |  |  |  |  |  |

Table S3. Causal association of 731 immune cells with spontaneous abortion, by Inverse Variance Weighted method screening.

| exposure_id | Exposure(panel-trait) | outcome | method | nsnp | b | se | pval | lo_ci | up_ci | or | or_lci95 | or_uci95 |
| --- | --- | --- | --- | --- | --- | --- | --- | --- | --- | --- | --- | --- |
| GCST90001391 | B cell___IgD+ %B cell | spontaneous abortion | Inverse variance weighted | 17 | -0.002 | 0.017 | 0.915 | -0.035 | 0.032 | 0.998 | 0.965 | 1.032 |
| GCST90001392 | B cell___IgD+ CD38br AC | spontaneous abortion | Inverse variance weighted | 29 | 0.009 | 0.006 | 0.149 | -0.003 | 0.020 | 1.009 | 0.997 | 1.021 |
| GCST90001393 | B cell___IgD+ CD38dim %B cell | spontaneous abortion | Inverse variance weighted | 15 | -0.007 | 0.018 | 0.685 | -0.043 | 0.029 | 0.993 | 0.957 | 1.029 |
| GCST90001394 | B cell___IgD+ CD38dim AC | spontaneous abortion | Inverse variance weighted | 25 | 0.013 | 0.006 | 0.046 | 0.000 | 0.025 | 1.013 | 1.000 | 1.026 |
| GCST90001395 | B cell___IgD+ CD38- %B cell | spontaneous abortion | Inverse variance weighted | 22 | -0.003 | 0.011 | 0.766 | -0.025 | 0.018 | 0.997 | 0.976 | 1.018 |
| GCST90001396 | B cell___IgD+ CD38- AC | spontaneous abortion | Inverse variance weighted | 17 | 0.024 | 0.020 | 0.235 | -0.016 | 0.064 | 1.024 | 0.984 | 1.066 |
| GCST90001397 | B cell___Unsw mem %B cell | spontaneous abortion | Inverse variance weighted | 31 | 0.004 | 0.010 | 0.706 | -0.016 | 0.023 | 1.004 | 0.985 | 1.023 |
| GCST90001398 | B cell___Unsw mem AC | spontaneous abortion | Inverse variance weighted | 20 | 0.034 | 0.019 | 0.079 | -0.004 | 0.072 | 1.034 | 0.996 | 1.074 |
| GCST90001399 | B cell___IgD- CD27- %B cell | spontaneous abortion | Inverse variance weighted | 15 | 0.014 | 0.024 | 0.568 | -0.033 | 0.060 | 1.014 | 0.968 | 1.062 |
| GCST90001400 | B cell___IgD+ AC | spontaneous abortion | Inverse variance weighted | 14 | 0.012 | 0.008 | 0.134 | -0.004 | 0.027 | 1.012 | 0.996 | 1.027 |
| GCST90001401 | B cell___IgD- CD27- AC | spontaneous abortion | Inverse variance weighted | 25 | -0.009 | 0.017 | 0.603 | -0.042 | 0.024 | 0.991 | 0.959 | 1.025 |
| GCST90001402 | B cell___Sw mem %B cell | spontaneous abortion | Inverse variance weighted | 13 | 0.001 | 0.022 | 0.976 | -0.043 | 0.044 | 1.001 | 0.958 | 1.045 |
| GCST90001403 | B cell___Sw mem AC | spontaneous abortion | Inverse variance weighted | 23 | 0.021 | 0.018 | 0.225 | -0.013 | 0.056 | 1.022 | 0.987 | 1.057 |
| GCST90001404 | B cell___PB/PC %B cell | spontaneous abortion | Inverse variance weighted | 26 | 0.005 | 0.011 | 0.672 | -0.016 | 0.026 | 1.005 | 0.984 | 1.026 |
| GCST90001405 | B cell___PB/PC AC | spontaneous abortion | Inverse variance weighted | 24 | 0.001 | 0.011 | 0.954 | -0.022 | 0.023 | 1.001 | 0.978 | 1.023 |
| GCST90001406 | B cell___Memory B cell %B cell | spontaneous abortion | Inverse variance weighted | 28 | 0.015 | 0.011 | 0.197 | -0.008 | 0.037 | 1.015 | 0.992 | 1.038 |
| GCST90001407 | B cell___Memory B cell AC | spontaneous abortion | Inverse variance weighted | 17 | 0.016 | 0.009 | 0.062 | -0.001 | 0.033 | 1.016 | 0.999 | 1.033 |
| GCST90001408 | B cell___Naive-mature B cell %B cell | spontaneous abortion | Inverse variance weighted | 28 | -0.005 | 0.012 | 0.694 | -0.027 | 0.018 | 0.995 | 0.973 | 1.018 |
| GCST90001409 | B cell___Naive-mature B cell AC | spontaneous abortion | Inverse variance weighted | 22 | -0.003 | 0.010 | 0.784 | -0.023 | 0.017 | 0.997 | 0.977 | 1.017 |
| GCST90001410 | B cell___IgD- CD38br %B cell | spontaneous abortion | Inverse variance weighted | 18 | -0.007 | 0.022 | 0.735 | -0.051 | 0.036 | 0.993 | 0.950 | 1.037 |
| GCST90001411 | B cell___IgD+ CD24+ %B cell | spontaneous abortion | Inverse variance weighted | 20 | 0.032 | 0.024 | 0.179 | -0.015 | 0.078 | 1.032 | 0.985 | 1.082 |
| GCST90001412 | B cell___IgD+ CD24+ AC | spontaneous abortion | Inverse variance weighted | 23 | 0.049 | 0.021 | 0.018 | 0.008 | 0.089 | 1.050 | 1.008 | 1.093 |
| GCST90001413 | B cell___IgD- CD24- %B cell | spontaneous abortion | Inverse variance weighted | 17 | 0.007 | 0.013 | 0.566 | -0.018 | 0.033 | 1.007 | 0.982 | 1.033 |
| GCST90001414 | B cell___IgD- CD24- AC | spontaneous abortion | Inverse variance weighted | 18 | -0.007 | 0.023 | 0.771 | -0.051 | 0.038 | 0.993 | 0.950 | 1.038 |
| GCST90001415 | B cell___IgD+ CD24- %B cell | spontaneous abortion | Inverse variance weighted | 18 | -0.005 | 0.011 | 0.681 | -0.027 | 0.018 | 0.995 | 0.973 | 1.018 |
| GCST90001416 | B cell___IgD+ CD24- AC | spontaneous abortion | Inverse variance weighted | 22 | 0.005 | 0.007 | 0.413 | -0.008 | 0.018 | 1.005 | 0.993 | 1.018 |
| GCST90001417 | B cell___CD24+ CD27+ %B cell | spontaneous abortion | Inverse variance weighted | 26 | 0.015 | 0.012 | 0.202 | -0.008 | 0.038 | 1.015 | 0.992 | 1.039 |
| GCST90001418 | B cell___CD24+ CD27+ AC | spontaneous abortion | Inverse variance weighted | 26 | 0.016 | 0.008 | 0.053 | 0.000 | 0.031 | 1.016 | 1.000 | 1.032 |
| GCST90001419 | B cell___CD20- %B cell | spontaneous abortion | Inverse variance weighted | 19 | 0.023 | 0.014 | 0.102 | -0.005 | 0.051 | 1.023 | 0.995 | 1.052 |
| GCST90001420 | B cell___IgD- CD38br AC | spontaneous abortion | Inverse variance weighted | 20 | 0.013 | 0.011 | 0.236 | -0.009 | 0.035 | 1.013 | 0.991 | 1.036 |
| GCST90001421 | B cell___CD20- AC | spontaneous abortion | Inverse variance weighted | 22 | -0.001 | 0.009 | 0.946 | -0.019 | 0.018 | 0.999 | 0.981 | 1.018 |
| GCST90001422 | B cell___CD20- CD38- %B cell | spontaneous abortion | Inverse variance weighted | 23 | -0.003 | 0.011 | 0.797 | -0.025 | 0.019 | 0.997 | 0.975 | 1.020 |
| GCST90001423 | B cell___CD20- CD38- AC | spontaneous abortion | Inverse variance weighted | 14 | -0.017 | 0.027 | 0.513 | -0.069 | 0.035 | 0.983 | 0.933 | 1.035 |
| GCST90001424 | B cell___IgD+ %Lymphocyte | spontaneous abortion | Inverse variance weighted | 18 | -0.009 | 0.010 | 0.361 | -0.029 | 0.011 | 0.991 | 0.971 | 1.011 |
| GCST90001425 | B cell___IgD- CD38br %lymphocyte | spontaneous abortion | Inverse variance weighted | 30 | -0.003 | 0.010 | 0.764 | -0.023 | 0.017 | 0.997 | 0.977 | 1.017 |
| GCST90001426 | B cell___IgD- CD38dim %lymphocyte | spontaneous abortion | Inverse variance weighted | 23 | 0.009 | 0.010 | 0.402 | -0.012 | 0.029 | 1.009 | 0.988 | 1.030 |
| GCST90001427 | B cell___IgD- CD38- %lymphocyte | spontaneous abortion | Inverse variance weighted | 28 | 0.024 | 0.020 | 0.225 | -0.015 | 0.062 | 1.024 | 0.985 | 1.064 |
| GCST90001428 | B cell___IgD- CD38dim %B cell | spontaneous abortion | Inverse variance weighted | 25 | 0.002 | 0.009 | 0.819 | -0.015 | 0.019 | 1.002 | 0.985 | 1.019 |
| GCST90001429 | B cell___IgD+ CD38br %lymphocyte | spontaneous abortion | Inverse variance weighted | 25 | -0.017 | 0.014 | 0.208 | -0.044 | 0.010 | 0.983 | 0.957 | 1.010 |
| GCST90001430 | B cell___IgD+ CD38dim %lymphocyte | spontaneous abortion | Inverse variance weighted | 33 | -0.012 | 0.007 | 0.083 | -0.026 | 0.002 | 0.988 | 0.975 | 1.002 |
| GCST90001431 | B cell___IgD+ CD38- %lymphocyte | spontaneous abortion | Inverse variance weighted | 20 | 0.004 | 0.013 | 0.752 | -0.021 | 0.029 | 1.004 | 0.979 | 1.029 |
| GCST90001432 | B cell___Unsw Mem %lymphocyte | spontaneous abortion | Inverse variance weighted | 22 | 0.037 | 0.019 | 0.047 | 0.001 | 0.074 | 1.038 | 1.001 | 1.077 |
| GCST90001433 | B cell___IgD- CD27- %lymphocyte | spontaneous abortion | Inverse variance weighted | 18 | 0.018 | 0.019 | 0.347 | -0.019 | 0.055 | 1.018 | 0.981 | 1.057 |
| GCST90001434 | B cell___Sw mem %lymphocyte | spontaneous abortion | Inverse variance weighted | 18 | 0.000 | 0.020 | 0.985 | -0.039 | 0.039 | 1.000 | 0.962 | 1.040 |
| GCST90001435 | B cell___PB/PC %lymphocyte | spontaneous abortion | Inverse variance weighted | 18 | -0.001 | 0.007 | 0.874 | -0.016 | 0.013 | 0.999 | 0.984 | 1.013 |
| GCST90001436 | B cell___Memory B cell %lymphocyte | spontaneous abortion | Inverse variance weighted | 28 | 0.014 | 0.008 | 0.064 | -0.001 | 0.030 | 1.014 | 0.999 | 1.030 |
| GCST90001437 | B cell___Naive-mature B cell %lymphocyte | spontaneous abortion | Inverse variance weighted | 21 | 0.009 | 0.021 | 0.673 | -0.032 | 0.050 | 1.009 | 0.968 | 1.052 |
| GCST90001438 | B cell___IgD- CD38dim AC | spontaneous abortion | Inverse variance weighted | 17 | 0.005 | 0.025 | 0.832 | -0.043 | 0.053 | 1.005 | 0.958 | 1.055 |
| GCST90001439 | B cell___IgD+ CD24+ %lymphocyte | spontaneous abortion | Inverse variance weighted | 15 | 0.056 | 0.025 | 0.023 | 0.008 | 0.104 | 1.058 | 1.008 | 1.110 |
| GCST90001440 | B cell___IgD- CD24- %lymphocyte | spontaneous abortion | Inverse variance weighted | 24 | 0.002 | 0.018 | 0.892 | -0.033 | 0.038 | 1.002 | 0.967 | 1.039 |
| GCST90001441 | B cell___IgD+ CD24- %lymphocyte | spontaneous abortion | Inverse variance weighted | 21 | 0.012 | 0.025 | 0.624 | -0.036 | 0.060 | 1.012 | 0.965 | 1.062 |
| GCST90001442 | B cell___CD24+ CD27+ %lymphocyte | spontaneous abortion | Inverse variance weighted | 24 | 0.016 | 0.008 | 0.040 | 0.001 | 0.030 | 1.016 | 1.001 | 1.031 |
| GCST90001443 | B cell___CD20- %lymphocyte | spontaneous abortion | Inverse variance weighted | 17 | 0.001 | 0.011 | 0.937 | -0.021 | 0.023 | 1.001 | 0.979 | 1.023 |
| GCST90001444 | B cell___CD20- CD38- %lymphocyte | spontaneous abortion | Inverse variance weighted | 23 | -0.017 | 0.015 | 0.265 | -0.046 | 0.013 | 0.983 | 0.955 | 1.013 |
| GCST90001445 | B cell___IgD- CD38- %B cell | spontaneous abortion | Inverse variance weighted | 12 | -0.007 | 0.025 | 0.781 | -0.056 | 0.042 | 0.993 | 0.945 | 1.043 |
| GCST90001446 | B cell___IgD- CD38- AC | spontaneous abortion | Inverse variance weighted | 14 | 0.021 | 0.017 | 0.214 | -0.012 | 0.055 | 1.022 | 0.988 | 1.057 |
| GCST90001447 | B cell___IgD+ CD38br %B cell | spontaneous abortion | Inverse variance weighted | 25 | 0.001 | 0.012 | 0.922 | -0.022 | 0.024 | 1.001 | 0.978 | 1.025 |
| GCST90001448 | cDC___CD11c+ monocyte AC | spontaneous abortion | Inverse variance weighted | 15 | 0.016 | 0.016 | 0.299 | -0.015 | 0.048 | 1.017 | 0.986 | 1.049 |
| GCST90001449 | cDC___CD11c+ monocyte %monocyte | spontaneous abortion | Inverse variance weighted | 20 | 0.017 | 0.019 | 0.361 | -0.020 | 0.054 | 1.017 | 0.981 | 1.055 |
| GCST90001450 | cDC___CD62L- monocyte AC | spontaneous abortion | Inverse variance weighted | 20 | -0.015 | 0.012 | 0.232 | -0.039 | 0.009 | 0.985 | 0.962 | 1.010 |
| GCST90001451 | cDC___CD62L- monocyte %monocyte | spontaneous abortion | Inverse variance weighted | 23 | -0.020 | 0.016 | 0.203 | -0.050 | 0.011 | 0.980 | 0.951 | 1.011 |
| GCST90001452 | cDC___CD11c+ CD62L- monocyte AC | spontaneous abortion | Inverse variance weighted | 22 | -0.009 | 0.012 | 0.437 | -0.032 | 0.014 | 0.991 | 0.968 | 1.014 |
| GCST90001453 | cDC___CD11c+ CD62L- monocyte %monocyte | spontaneous abortion | Inverse variance weighted | 18 | -0.011 | 0.022 | 0.632 | -0.055 | 0.033 | 0.989 | 0.947 | 1.034 |
| GCST90001454 | cDC___CD62L- HLA DR++ monocyte AC | spontaneous abortion | Inverse variance weighted | 19 | 0.024 | 0.021 | 0.271 | -0.018 | 0.066 | 1.024 | 0.982 | 1.068 |
| GCST90001455 | cDC___CD62L- HLA DR++ monocyte %monocyte | spontaneous abortion | Inverse variance weighted | 11 | -0.019 | 0.026 | 0.469 | -0.070 | 0.032 | 0.981 | 0.932 | 1.033 |
| GCST90001456 | cDC___CD11c+ HLA DR++ monocyte AC | spontaneous abortion | Inverse variance weighted | 17 | -0.010 | 0.018 | 0.582 | -0.046 | 0.026 | 0.990 | 0.955 | 1.026 |
| GCST90001457 | cDC___CD11c+ HLA DR++ monocyte %monocyte | spontaneous abortion | Inverse variance weighted | 17 | -0.014 | 0.012 | 0.247 | -0.037 | 0.010 | 0.986 | 0.964 | 1.010 |
| GCST90001458 | cDC___Myeloid DC AC | spontaneous abortion | Inverse variance weighted | 23 | 0.013 | 0.010 | 0.191 | -0.007 | 0.033 | 1.013 | 0.993 | 1.034 |
| GCST90001459 | cDC___Myeloid DC %DC | spontaneous abortion | Inverse variance weighted | 26 | 0.011 | 0.015 | 0.444 | -0.018 | 0.041 | 1.011 | 0.982 | 1.041 |
| GCST90001460 | cDC___Plasmacytoid DC AC | spontaneous abortion | Inverse variance weighted | 30 | -0.008 | 0.008 | 0.338 | -0.025 | 0.008 | 0.992 | 0.976 | 1.009 |
| GCST90001461 | cDC___DC AC | spontaneous abortion | Inverse variance weighted | 21 | 0.004 | 0.017 | 0.822 | -0.029 | 0.037 | 1.004 | 0.971 | 1.038 |
| GCST90001462 | cDC___CD62L- DC AC | spontaneous abortion | Inverse variance weighted | 18 | -0.005 | 0.008 | 0.477 | -0.020 | 0.010 | 0.995 | 0.980 | 1.010 |
| GCST90001463 | cDC___CD62L- DC %DC | spontaneous abortion | Inverse variance weighted | 22 | 0.019 | 0.011 | 0.069 | -0.002 | 0.040 | 1.020 | 0.998 | 1.041 |
| GCST90001464 | cDC___CD86+ myeloid DC AC | spontaneous abortion | Inverse variance weighted | 21 | 0.000 | 0.010 | 0.979 | -0.019 | 0.019 | 1.000 | 0.981 | 1.020 |
| GCST90001465 | cDC___CD86+ myeloid DC %DC | spontaneous abortion | Inverse variance weighted | 23 | -0.006 | 0.006 | 0.355 | -0.018 | 0.006 | 0.994 | 0.982 | 1.006 |
| GCST90001466 | cDC___CD86+ plasmacytoid DC AC | spontaneous abortion | Inverse variance weighted | 20 | -0.012 | 0.019 | 0.544 | -0.050 | 0.026 | 0.988 | 0.951 | 1.027 |
| GCST90001467 | cDC___CD86+ plasmacytoid DC %DC | spontaneous abortion | Inverse variance weighted | 26 | -0.018 | 0.016 | 0.273 | -0.049 | 0.014 | 0.983 | 0.952 | 1.014 |
| GCST90001468 | cDC___CD62L- myeloid DC AC | spontaneous abortion | Inverse variance weighted | 16 | 0.007 | 0.016 | 0.672 | -0.025 | 0.039 | 1.007 | 0.975 | 1.040 |
| GCST90001469 | cDC___CD62L- myeloid DC %DC | spontaneous abortion | Inverse variance weighted | 24 | 0.002 | 0.011 | 0.877 | -0.019 | 0.022 | 1.002 | 0.981 | 1.022 |
| GCST90001470 | cDC___CD62L- plasmacytoid DC AC | spontaneous abortion | Inverse variance weighted | 24 | 0.012 | 0.015 | 0.416 | -0.017 | 0.040 | 1.012 | 0.983 | 1.041 |
| GCST90001471 | cDC___CD62L- plasmacytoid DC %DC | spontaneous abortion | Inverse variance weighted | 18 | -0.008 | 0.012 | 0.504 | -0.032 | 0.016 | 0.992 | 0.969 | 1.016 |
| GCST90001472 | cDC___CD62L- CD86+ myeloid DC AC | spontaneous abortion | Inverse variance weighted | 19 | -0.006 | 0.012 | 0.622 | -0.029 | 0.017 | 0.994 | 0.972 | 1.017 |
| GCST90001473 | cDC___CD62L- CD86+ myeloid DC %DC | spontaneous abortion | Inverse variance weighted | 18 | 0.003 | 0.015 | 0.868 | -0.027 | 0.032 | 1.003 | 0.973 | 1.033 |
| GCST90001474 | cDC___Plasmacytoid DC %DC | spontaneous abortion | Inverse variance weighted | 24 | 0.001 | 0.012 | 0.928 | -0.022 | 0.024 | 1.001 | 0.979 | 1.024 |
| GCST90001475 | TBNK___HLA DR++ monocyte %monocyte | spontaneous abortion | Inverse variance weighted | 21 | -0.017 | 0.015 | 0.265 | -0.046 | 0.013 | 0.984 | 0.955 | 1.013 |
| GCST90001476 | TBNK___HLA DR++ monocyte %leukocyte | spontaneous abortion | Inverse variance weighted | 8 | 0.004 | 0.022 | 0.849 | -0.038 | 0.046 | 1.004 | 0.962 | 1.048 |
| GCST90001477 | TBNK___HLA DR++ monocyte AC | spontaneous abortion | Inverse variance weighted | 23 | 0.008 | 0.011 | 0.455 | -0.014 | 0.030 | 1.008 | 0.987 | 1.031 |
| GCST90001478 | Treg___CD4 Treg %CD4 | spontaneous abortion | Inverse variance weighted | 16 | -0.009 | 0.014 | 0.547 | -0.036 | 0.019 | 0.991 | 0.964 | 1.020 |
| GCST90001479 | Treg___CD4 Treg %T cell | spontaneous abortion | Inverse variance weighted | 16 | -0.008 | 0.016 | 0.646 | -0.040 | 0.025 | 0.992 | 0.961 | 1.025 |
| GCST90001480 | Treg___Resting Treg AC | spontaneous abortion | Inverse variance weighted | 25 | -0.002 | 0.015 | 0.872 | -0.031 | 0.026 | 0.998 | 0.969 | 1.027 |
| GCST90001481 | Treg___Resting Treg % CD4 Treg | spontaneous abortion | Inverse variance weighted | 30 | 0.002 | 0.006 | 0.707 | -0.010 | 0.015 | 1.002 | 0.990 | 1.015 |
| GCST90001482 | Treg___Resting Treg %CD4 | spontaneous abortion | Inverse variance weighted | 33 | 0.008 | 0.007 | 0.281 | -0.006 | 0.022 | 1.008 | 0.994 | 1.022 |
| GCST90001483 | Treg___CD39+ resting Treg AC | spontaneous abortion | Inverse variance weighted | 28 | -0.001 | 0.010 | 0.901 | -0.021 | 0.019 | 0.999 | 0.979 | 1.019 |
| GCST90001484 | Treg___CD39+ resting Treg %resting Treg | spontaneous abortion | Inverse variance weighted | 28 | 0.005 | 0.012 | 0.670 | -0.018 | 0.028 | 1.005 | 0.982 | 1.029 |
| GCST90001485 | Treg___CD39+ resting Treg % CD4 Treg | spontaneous abortion | Inverse variance weighted | 35 | 0.005 | 0.007 | 0.516 | -0.009 | 0.018 | 1.005 | 0.991 | 1.019 |
| GCST90001486 | Treg___Activated Treg AC | spontaneous abortion | Inverse variance weighted | 15 | -0.007 | 0.011 | 0.502 | -0.029 | 0.014 | 0.993 | 0.972 | 1.014 |
| GCST90001487 | Treg___Activated Treg %CD4 Treg | spontaneous abortion | Inverse variance weighted | 28 | -0.005 | 0.012 | 0.669 | -0.029 | 0.019 | 0.995 | 0.971 | 1.019 |
| GCST90001488 | Treg___Activated Treg %CD4 | spontaneous abortion | Inverse variance weighted | 19 | -0.016 | 0.015 | 0.279 | -0.044 | 0.013 | 0.984 | 0.957 | 1.013 |
| GCST90001489 | Treg___CD39+ activated Treg AC | spontaneous abortion | Inverse variance weighted | 30 | 0.009 | 0.006 | 0.174 | -0.004 | 0.021 | 1.009 | 0.996 | 1.021 |
| GCST90001490 | Treg___CD39+ activated Treg %activated Treg | spontaneous abortion | Inverse variance weighted | 8 | 0.023 | 0.029 | 0.420 | -0.033 | 0.080 | 1.024 | 0.967 | 1.083 |
| GCST90001491 | Treg___CD39+ activated Treg %CD4 Treg | spontaneous abortion | Inverse variance weighted | 22 | 0.008 | 0.009 | 0.344 | -0.009 | 0.025 | 1.008 | 0.991 | 1.026 |
| GCST90001492 | Treg___Secreting Treg AC | spontaneous abortion | Inverse variance weighted | 23 | -0.008 | 0.005 | 0.123 | -0.017 | 0.002 | 0.992 | 0.983 | 1.002 |
| GCST90001493 | Treg___Secreting Treg % CD4 Treg | spontaneous abortion | Inverse variance weighted | 31 | -0.002 | 0.008 | 0.828 | -0.018 | 0.014 | 0.998 | 0.983 | 1.014 |
| GCST90001494 | Treg___Secreting Treg %CD4 | spontaneous abortion | Inverse variance weighted | 25 | 0.003 | 0.008 | 0.756 | -0.014 | 0.019 | 1.003 | 0.987 | 1.019 |
| GCST90001495 | Treg___CD39+ secreting Treg AC | spontaneous abortion | Inverse variance weighted | 26 | 0.017 | 0.009 | 0.052 | 0.000 | 0.034 | 1.017 | 1.000 | 1.034 |
| GCST90001496 | Treg___CD39+ secreting Treg %secreting Treg | spontaneous abortion | Inverse variance weighted | 28 | 0.001 | 0.009 | 0.935 | -0.016 | 0.018 | 1.001 | 0.984 | 1.018 |
| GCST90001497 | Treg___CD39+ secreting Treg %CD4 Treg | spontaneous abortion | Inverse variance weighted | 22 | -0.001 | 0.011 | 0.936 | -0.022 | 0.020 | 0.999 | 0.978 | 1.020 |
| GCST90001498 | Treg___Activated & resting Treg AC | spontaneous abortion | Inverse variance weighted | 19 | -0.014 | 0.020 | 0.494 | -0.053 | 0.026 | 0.986 | 0.948 | 1.026 |
| GCST90001499 | Treg___Activated & resting Treg % CD4 Treg | spontaneous abortion | Inverse variance weighted | 29 | 0.002 | 0.008 | 0.844 | -0.014 | 0.017 | 1.002 | 0.986 | 1.018 |
| GCST90001500 | Treg___Activated & resting Treg %CD4+ | spontaneous abortion | Inverse variance weighted | 26 | -0.005 | 0.013 | 0.719 | -0.031 | 0.021 | 0.995 | 0.970 | 1.021 |
| GCST90001501 | Treg___Activated & secreting Treg AC | spontaneous abortion | Inverse variance weighted | 22 | -0.007 | 0.005 | 0.167 | -0.016 | 0.003 | 0.993 | 0.984 | 1.003 |
| GCST90001502 | Treg___Activated & secreting Treg %CD4 Treg | spontaneous abortion | Inverse variance weighted | 37 | 0.005 | 0.004 | 0.253 | -0.003 | 0.012 | 1.005 | 0.997 | 1.012 |
| GCST90001503 | Treg___Activated & secreting Treg %CD4+ | spontaneous abortion | Inverse variance weighted | 31 | 0.007 | 0.005 | 0.168 | -0.003 | 0.017 | 1.007 | 0.997 | 1.017 |
| GCST90001504 | Treg___CD25hi AC | spontaneous abortion | Inverse variance weighted | 23 | -0.001 | 0.011 | 0.959 | -0.021 | 0.020 | 0.999 | 0.979 | 1.020 |
| GCST90001505 | Treg___CD25hi %CD4+ | spontaneous abortion | Inverse variance weighted | 26 | 0.009 | 0.013 | 0.481 | -0.017 | 0.035 | 1.009 | 0.983 | 1.036 |
| GCST90001506 | Treg___CD25hi %T cell | spontaneous abortion | Inverse variance weighted | 18 | 0.020 | 0.016 | 0.206 | -0.011 | 0.050 | 1.020 | 0.989 | 1.051 |
| GCST90001507 | Treg___CD25hi CD45RA+ CD4 not Treg AC | spontaneous abortion | Inverse variance weighted | 25 | -0.003 | 0.010 | 0.773 | -0.023 | 0.017 | 0.997 | 0.977 | 1.017 |
| GCST90001508 | Treg___CD25hi CD45RA+ CD4 not Treg %CD4+ | spontaneous abortion | Inverse variance weighted | 32 | 0.006 | 0.007 | 0.348 | -0.007 | 0.019 | 1.006 | 0.993 | 1.019 |
| GCST90001509 | Treg___CD25hi CD45RA+ CD4 not Treg %T cell | spontaneous abortion | Inverse variance weighted | 27 | 0.004 | 0.007 | 0.537 | -0.009 | 0.017 | 1.004 | 0.991 | 1.017 |
| GCST90001510 | Treg___CD25hi CD45RA- CD4 not Treg AC | spontaneous abortion | Inverse variance weighted | 20 | -0.005 | 0.007 | 0.431 | -0.019 | 0.008 | 0.995 | 0.982 | 1.008 |
| GCST90001511 | Treg___CD25hi CD45RA- CD4 not Treg %CD4+ | spontaneous abortion | Inverse variance weighted | 24 | 0.001 | 0.009 | 0.897 | -0.016 | 0.018 | 1.001 | 0.984 | 1.018 |
| GCST90001512 | Treg___CD25hi CD45RA- CD4 not Treg %T cell | spontaneous abortion | Inverse variance weighted | 28 | 0.009 | 0.007 | 0.210 | -0.005 | 0.024 | 1.009 | 0.995 | 1.024 |
| GCST90001513 | Treg___CD4 Treg AC | spontaneous abortion | Inverse variance weighted | 21 | -0.019 | 0.014 | 0.159 | -0.046 | 0.008 | 0.981 | 0.955 | 1.008 |
| GCST90001514 | Myeloid cell___HSC AC | spontaneous abortion | Inverse variance weighted | 19 | -0.005 | 0.012 | 0.662 | -0.028 | 0.018 | 0.995 | 0.972 | 1.018 |
| GCST90001515 | Myeloid cell___Im MDSC AC | spontaneous abortion | Inverse variance weighted | 22 | 0.004 | 0.013 | 0.776 | -0.023 | 0.030 | 1.004 | 0.978 | 1.031 |
| GCST90001516 | Myeloid cell___Im MDSC %CD33dim HLA DR- CD66b- | spontaneous abortion | Inverse variance weighted | 19 | -0.023 | 0.012 | 0.065 | -0.047 | 0.001 | 0.978 | 0.955 | 1.001 |
| GCST90001517 | Myeloid cell___CD33br HLA DR+ AC | spontaneous abortion | Inverse variance weighted | 30 | -0.009 | 0.006 | 0.122 | -0.021 | 0.002 | 0.991 | 0.979 | 1.002 |
| GCST90001518 | Myeloid cell___CD33br HLA DR+ CD14- AC | spontaneous abortion | Inverse variance weighted | 29 | -0.010 | 0.005 | 0.041 | -0.019 | 0.000 | 0.990 | 0.981 | 1.000 |
| GCST90001519 | Myeloid cell___CD33br HLA DR+ CD14- %CD33br HLA DR+ | spontaneous abortion | Inverse variance weighted | 19 | 0.002 | 0.011 | 0.815 | -0.018 | 0.023 | 1.002 | 0.982 | 1.023 |
| GCST90001520 | Myeloid cell___CD33br HLA DR+ CD14dim AC | spontaneous abortion | Inverse variance weighted | 28 | -0.009 | 0.007 | 0.196 | -0.024 | 0.005 | 0.991 | 0.977 | 1.005 |
| GCST90001521 | Myeloid cell___CD33br HLA DR+ CD14dim %CD33br HLA DR+ | spontaneous abortion | Inverse variance weighted | 25 | -0.013 | 0.011 | 0.232 | -0.035 | 0.009 | 0.987 | 0.965 | 1.009 |
| GCST90001522 | Myeloid cell___CD33- HLA DR- AC | spontaneous abortion | Inverse variance weighted | 21 | 0.010 | 0.013 | 0.425 | -0.015 | 0.035 | 1.010 | 0.985 | 1.036 |
| GCST90001523 | Myeloid cell___CD33- HLA DR+ AC | spontaneous abortion | Inverse variance weighted | 36 | -0.005 | 0.007 | 0.502 | -0.020 | 0.010 | 0.995 | 0.981 | 1.010 |
| GCST90001524 | Myeloid cell___Gr MDSC AC | spontaneous abortion | Inverse variance weighted | 21 | 0.009 | 0.013 | 0.520 | -0.018 | 0.035 | 1.009 | 0.982 | 1.036 |
| GCST90001525 | Myeloid cell___CD33dim HLA DR+ CD11b+ AC | spontaneous abortion | Inverse variance weighted | 26 | -0.008 | 0.011 | 0.469 | -0.029 | 0.013 | 0.992 | 0.971 | 1.014 |
| GCST90001526 | Myeloid cell___CD33dim HLA DR+ CD11b+ %CD33dim HLA DR+ | spontaneous abortion | Inverse variance weighted | 24 | 0.009 | 0.007 | 0.242 | -0.006 | 0.023 | 1.009 | 0.994 | 1.023 |
| GCST90001527 | Myeloid cell___CD33dim HLA DR+ CD11b- AC | spontaneous abortion | Inverse variance weighted | 28 | 0.002 | 0.007 | 0.782 | -0.013 | 0.017 | 1.002 | 0.988 | 1.017 |
| GCST90001528 | Myeloid cell___CD33dim HLA DR+ CD11b- %CD33dim HLA DR+ | spontaneous abortion | Inverse variance weighted | 24 | -0.002 | 0.006 | 0.712 | -0.014 | 0.010 | 0.998 | 0.986 | 1.010 |
| GCST90001529 | Myeloid cell___CD66b++ myeloid cell AC | spontaneous abortion | Inverse variance weighted | 16 | -0.014 | 0.017 | 0.403 | -0.048 | 0.019 | 0.986 | 0.953 | 1.019 |
| GCST90001530 | Myeloid cell___Mo MDSC AC | spontaneous abortion | Inverse variance weighted | 19 | 0.013 | 0.013 | 0.290 | -0.011 | 0.038 | 1.014 | 0.989 | 1.039 |
| GCST90001531 | Myeloid cell___CD33dim HLA DR- AC | spontaneous abortion | Inverse variance weighted | 24 | 0.000 | 0.006 | 0.932 | -0.011 | 0.012 | 1.000 | 0.990 | 1.012 |
| GCST90001532 | Myeloid cell___Basophil AC | spontaneous abortion | Inverse variance weighted | 23 | 0.002 | 0.006 | 0.704 | -0.009 | 0.014 | 1.002 | 0.991 | 1.014 |
| GCST90001533 | Myeloid cell___Basophil %CD33dim HLA DR- CD66b- | spontaneous abortion | Inverse variance weighted | 20 | 0.004 | 0.012 | 0.747 | -0.020 | 0.027 | 1.004 | 0.981 | 1.028 |
| GCST90001534 | Maturation stages of T cell___CD45RA- CD4+ AC | spontaneous abortion | Inverse variance weighted | 15 | -0.006 | 0.008 | 0.426 | -0.022 | 0.009 | 0.994 | 0.978 | 1.009 |
| GCST90001535 | Maturation stages of T cell___CD45RA- CD4+ %CD4+ | spontaneous abortion | Inverse variance weighted | 30 | -0.005 | 0.012 | 0.684 | -0.029 | 0.019 | 0.995 | 0.972 | 1.019 |
| GCST90001536 | Maturation stages of T cell___CD45RA- CD4+ %T cell | spontaneous abortion | Inverse variance weighted | 25 | 0.009 | 0.005 | 0.049 | 0.000 | 0.019 | 1.010 | 1.000 | 1.019 |
| GCST90001537 | Maturation stages of T cell___CM CD4+ AC | spontaneous abortion | Inverse variance weighted | 28 | -0.010 | 0.014 | 0.466 | -0.037 | 0.017 | 0.990 | 0.964 | 1.017 |
| GCST90001538 | Maturation stages of T cell___CM CD4+ %CD4+ | spontaneous abortion | Inverse variance weighted | 32 | 0.002 | 0.004 | 0.731 | -0.007 | 0.010 | 1.002 | 0.993 | 1.010 |
| GCST90001539 | Maturation stages of T cell___CM CD4+ %T cell | spontaneous abortion | Inverse variance weighted | 24 | 0.038 | 0.014 | 0.008 | 0.010 | 0.067 | 1.039 | 1.010 | 1.069 |
| GCST90001540 | Maturation stages of T cell___Naive CD4+ AC | spontaneous abortion | Inverse variance weighted | 25 | -0.006 | 0.021 | 0.789 | -0.047 | 0.035 | 0.994 | 0.954 | 1.036 |
| GCST90001541 | Maturation stages of T cell___Naive CD4+ %CD4+ | spontaneous abortion | Inverse variance weighted | 35 | -0.004 | 0.015 | 0.809 | -0.032 | 0.025 | 0.996 | 0.968 | 1.025 |
| GCST90001542 | Maturation stages of T cell___EM CD4+ AC | spontaneous abortion | Inverse variance weighted | 22 | -0.007 | 0.008 | 0.396 | -0.022 | 0.009 | 0.993 | 0.978 | 1.009 |
| GCST90001543 | Maturation stages of T cell___EM CD4+ %CD4+ | spontaneous abortion | Inverse variance weighted | 28 | 0.015 | 0.012 | 0.223 | -0.009 | 0.039 | 1.015 | 0.991 | 1.040 |
| GCST90001544 | Maturation stages of T cell___EM CD4+ %T cell | spontaneous abortion | Inverse variance weighted | 20 | 0.011 | 0.018 | 0.552 | -0.025 | 0.047 | 1.011 | 0.975 | 1.048 |
| GCST90001545 | Maturation stages of T cell___TD CD4+ AC | spontaneous abortion | Inverse variance weighted | 11 | 0.003 | 0.021 | 0.895 | -0.039 | 0.044 | 1.003 | 0.962 | 1.045 |
| GCST90001546 | Maturation stages of T cell___TD CD4+ %CD4+ | spontaneous abortion | Inverse variance weighted | 21 | -0.008 | 0.020 | 0.685 | -0.046 | 0.030 | 0.992 | 0.955 | 1.031 |
| GCST90001547 | Maturation stages of T cell___TD CD4+ %T cell | spontaneous abortion | Inverse variance weighted | 26 | -0.005 | 0.009 | 0.550 | -0.023 | 0.012 | 0.995 | 0.977 | 1.013 |
| GCST90001548 | Maturation stages of T cell___CM CD8br AC | spontaneous abortion | Inverse variance weighted | 25 | -0.014 | 0.018 | 0.457 | -0.050 | 0.022 | 0.986 | 0.951 | 1.023 |
| GCST90001549 | Maturation stages of T cell___CM CD8br %CD8br | spontaneous abortion | Inverse variance weighted | 31 | 0.009 | 0.016 | 0.568 | -0.023 | 0.041 | 1.009 | 0.978 | 1.042 |
| GCST90001550 | Maturation stages of T cell___CM CD8br %T cell | spontaneous abortion | Inverse variance weighted | 22 | 0.029 | 0.019 | 0.128 | -0.008 | 0.066 | 1.029 | 0.992 | 1.068 |
| GCST90001551 | Maturation stages of T cell___Naive CD8br AC | spontaneous abortion | Inverse variance weighted | 27 | -0.004 | 0.012 | 0.774 | -0.028 | 0.021 | 0.996 | 0.973 | 1.021 |
| GCST90001552 | Maturation stages of T cell___Naive CD8br %CD8br | spontaneous abortion | Inverse variance weighted | 36 | -0.002 | 0.006 | 0.773 | -0.013 | 0.010 | 0.998 | 0.987 | 1.010 |
| GCST90001553 | Maturation stages of T cell___Naive CD8br %T cell | spontaneous abortion | Inverse variance weighted | 27 | 0.005 | 0.009 | 0.596 | -0.013 | 0.023 | 1.005 | 0.987 | 1.023 |
| GCST90001554 | Maturation stages of T cell___EM CD8br AC | spontaneous abortion | Inverse variance weighted | 24 | -0.002 | 0.010 | 0.826 | -0.022 | 0.018 | 0.998 | 0.978 | 1.018 |
| GCST90001555 | Maturation stages of T cell___EM CD8br %CD8br | spontaneous abortion | Inverse variance weighted | 24 | 0.002 | 0.006 | 0.699 | -0.010 | 0.015 | 1.003 | 0.990 | 1.015 |
| GCST90001556 | Maturation stages of T cell___EM CD8br %T cell | spontaneous abortion | Inverse variance weighted | 15 | -0.009 | 0.011 | 0.410 | -0.029 | 0.012 | 0.991 | 0.971 | 1.012 |
| GCST90001557 | Maturation stages of T cell___TD CD8br AC | spontaneous abortion | Inverse variance weighted | 17 | -0.025 | 0.018 | 0.171 | -0.061 | 0.011 | 0.975 | 0.941 | 1.011 |
| GCST90001558 | Maturation stages of T cell___TD CD8br %CD8br | spontaneous abortion | Inverse variance weighted | 23 | 0.001 | 0.013 | 0.929 | -0.024 | 0.026 | 1.001 | 0.977 | 1.026 |
| GCST90001559 | Maturation stages of T cell___TD CD8br %T cell | spontaneous abortion | Inverse variance weighted | 17 | 0.008 | 0.017 | 0.656 | -0.026 | 0.041 | 1.008 | 0.974 | 1.042 |
| GCST90001560 | Maturation stages of T cell___CD45RA+ CD8br AC | spontaneous abortion | Inverse variance weighted | 27 | -0.006 | 0.005 | 0.165 | -0.015 | 0.003 | 0.994 | 0.985 | 1.003 |
| GCST90001561 | Maturation stages of T cell___CD45RA+ CD8br %CD8br | spontaneous abortion | Inverse variance weighted | 26 | -0.003 | 0.007 | 0.693 | -0.015 | 0.010 | 0.997 | 0.985 | 1.010 |
| GCST90001562 | Maturation stages of T cell___CD45RA+ CD8br %T cell | spontaneous abortion | Inverse variance weighted | 33 | -0.009 | 0.005 | 0.069 | -0.018 | 0.001 | 0.991 | 0.982 | 1.001 |
| GCST90001563 | Maturation stages of T cell___CM DN (CD4-CD8-) AC | spontaneous abortion | Inverse variance weighted | 4 | -0.012 | 0.015 | 0.421 | -0.041 | 0.017 | 0.988 | 0.960 | 1.017 |
| GCST90001564 | Maturation stages of T cell___CM DN (CD4-CD8-) %DN | spontaneous abortion | Inverse variance weighted | 16 | 0.002 | 0.018 | 0.906 | -0.034 | 0.038 | 1.002 | 0.967 | 1.039 |
| GCST90001565 | Maturation stages of T cell___CM DN (CD4-CD8-) %T cell | spontaneous abortion | Inverse variance weighted | 16 | -0.015 | 0.017 | 0.377 | -0.049 | 0.018 | 0.985 | 0.952 | 1.019 |
| GCST90001566 | Maturation stages of T cell___Naive DN (CD4-CD8-) AC | spontaneous abortion | Inverse variance weighted | 18 | 0.025 | 0.024 | 0.293 | -0.021 | 0.071 | 1.025 | 0.979 | 1.074 |
| GCST90001567 | Maturation stages of T cell___Naive DN (CD4-CD8-) %DN | spontaneous abortion | Inverse variance weighted | 22 | -0.013 | 0.016 | 0.424 | -0.045 | 0.019 | 0.987 | 0.956 | 1.019 |
| GCST90001568 | Maturation stages of T cell___Naive DN (CD4-CD8-) %T cell | spontaneous abortion | Inverse variance weighted | 20 | 0.009 | 0.018 | 0.635 | -0.027 | 0.044 | 1.009 | 0.973 | 1.045 |
| GCST90001569 | Maturation stages of T cell___EM DN (CD4-CD8-) AC | spontaneous abortion | Inverse variance weighted | 19 | -0.047 | 0.026 | 0.067 | -0.098 | 0.003 | 0.954 | 0.907 | 1.003 |
| GCST90001570 | Maturation stages of T cell___EM DN (CD4-CD8-) %DN | spontaneous abortion | Inverse variance weighted | 28 | -0.010 | 0.011 | 0.383 | -0.032 | 0.012 | 0.990 | 0.969 | 1.012 |
| GCST90001571 | Maturation stages of T cell___EM DN (CD4-CD8-) %T cell | spontaneous abortion | Inverse variance weighted | 23 | -0.030 | 0.020 | 0.121 | -0.069 | 0.008 | 0.970 | 0.934 | 1.008 |
| GCST90001572 | Maturation stages of T cell___TD DN (CD4-CD8-) AC | spontaneous abortion | Inverse variance weighted | 20 | 0.000 | 0.017 | 0.994 | -0.033 | 0.032 | 1.000 | 0.968 | 1.033 |
| GCST90001573 | Maturation stages of T cell___TD DN (CD4-CD8-) %DN | spontaneous abortion | Inverse variance weighted | 26 | 0.028 | 0.013 | 0.029 | 0.003 | 0.053 | 1.028 | 1.003 | 1.054 |
| GCST90001574 | Maturation stages of T cell___TD DN (CD4-CD8-) %T cell | spontaneous abortion | Inverse variance weighted | 23 | 0.008 | 0.013 | 0.519 | -0.017 | 0.033 | 1.008 | 0.984 | 1.033 |
| GCST90001575 | Maturation stages of T cell___Naive CD4+ %T cell | spontaneous abortion | Inverse variance weighted | 34 | -0.010 | 0.012 | 0.412 | -0.033 | 0.013 | 0.990 | 0.968 | 1.013 |
| GCST90001576 | B cell___Transitional %B cell | spontaneous abortion | Inverse variance weighted | 15 | -0.007 | 0.028 | 0.812 | -0.062 | 0.048 | 0.993 | 0.940 | 1.049 |
| GCST90001577 | B cell___Transitional AC | spontaneous abortion | Inverse variance weighted | 31 | 0.005 | 0.016 | 0.732 | -0.025 | 0.036 | 1.005 | 0.975 | 1.037 |
| GCST90001578 | B cell___Transitional %lymphocyte | spontaneous abortion | Inverse variance weighted | 26 | -0.030 | 0.018 | 0.092 | -0.064 | 0.005 | 0.971 | 0.938 | 1.005 |
| GCST90001579 | Monocyte___CD14- CD16+ monocyte AC | spontaneous abortion | Inverse variance weighted | 18 | -0.002 | 0.012 | 0.881 | -0.026 | 0.022 | 0.998 | 0.974 | 1.023 |
| GCST90001580 | Monocyte___CD14+ CD16+ monocyte AC | spontaneous abortion | Inverse variance weighted | 20 | -0.013 | 0.017 | 0.443 | -0.047 | 0.021 | 0.987 | 0.954 | 1.021 |
| GCST90001581 | Monocyte___CD14- CD16- AC | spontaneous abortion | Inverse variance weighted | 24 | 0.011 | 0.008 | 0.190 | -0.006 | 0.028 | 1.011 | 0.995 | 1.028 |
| GCST90001582 | Monocyte___CD14+ CD16- monocyte AC | spontaneous abortion | Inverse variance weighted | 27 | -0.008 | 0.011 | 0.503 | -0.030 | 0.015 | 0.992 | 0.970 | 1.015 |
| GCST90001583 | Monocyte___Monocyte AC | spontaneous abortion | Inverse variance weighted | 27 | -0.008 | 0.009 | 0.400 | -0.027 | 0.011 | 0.992 | 0.974 | 1.011 |
| GCST90001584 | Monocyte___CD14- CD16+ monocyte %monocyte | spontaneous abortion | Inverse variance weighted | 23 | -0.010 | 0.019 | 0.595 | -0.047 | 0.027 | 0.990 | 0.954 | 1.027 |
| GCST90001585 | Monocyte___CD14+ CD16+ monocyte %monocyte | spontaneous abortion | Inverse variance weighted | 24 | -0.004 | 0.017 | 0.834 | -0.037 | 0.030 | 0.996 | 0.964 | 1.030 |
| GCST90001586 | Monocyte___CD14+ CD16- monocyte %monocyte | spontaneous abortion | Inverse variance weighted | 24 | 0.006 | 0.007 | 0.401 | -0.008 | 0.020 | 1.006 | 0.992 | 1.020 |
| GCST90001587 | Monocyte___CD16+ monocyte %monocyte | spontaneous abortion | Inverse variance weighted | 22 | -0.031 | 0.019 | 0.094 | -0.068 | 0.005 | 0.969 | 0.935 | 1.005 |
| GCST90001588 | TBNK___T/B | spontaneous abortion | Inverse variance weighted | 28 | -0.016 | 0.016 | 0.321 | -0.047 | 0.015 | 0.984 | 0.954 | 1.016 |
| GCST90001589 | TBNK___CD4/CD8br | spontaneous abortion | Inverse variance weighted | 14 | -0.016 | 0.024 | 0.508 | -0.064 | 0.032 | 0.984 | 0.938 | 1.032 |
| GCST90001590 | TBNK___CD4+ AC | spontaneous abortion | Inverse variance weighted | 22 | -0.027 | 0.012 | 0.028 | -0.051 | -0.003 | 0.973 | 0.950 | 0.997 |
| GCST90001591 | TBNK___CD4+ %T cell | spontaneous abortion | Inverse variance weighted | 22 | 0.010 | 0.016 | 0.523 | -0.021 | 0.042 | 1.010 | 0.979 | 1.043 |
| GCST90001592 | TBNK___CD8br AC | spontaneous abortion | Inverse variance weighted | 20 | -0.017 | 0.008 | 0.046 | -0.033 | 0.000 | 0.983 | 0.968 | 1.000 |
| GCST90001593 | TBNK___CD8br %T cell | spontaneous abortion | Inverse variance weighted | 22 | 0.017 | 0.015 | 0.266 | -0.013 | 0.046 | 1.017 | 0.987 | 1.047 |
| GCST90001594 | TBNK___DP (CD4+CD8+) AC | spontaneous abortion | Inverse variance weighted | 18 | -0.014 | 0.023 | 0.536 | -0.060 | 0.031 | 0.986 | 0.942 | 1.032 |
| GCST90001595 | TBNK___DP (CD4+CD8+) %T cell | spontaneous abortion | Inverse variance weighted | 8 | 0.003 | 0.036 | 0.942 | -0.068 | 0.074 | 1.003 | 0.934 | 1.076 |
| GCST90001596 | TBNK___CD8dim AC | spontaneous abortion | Inverse variance weighted | 27 | 0.003 | 0.010 | 0.801 | -0.018 | 0.023 | 1.003 | 0.982 | 1.023 |
| GCST90001597 | TBNK___CD8dim %T cell | spontaneous abortion | Inverse variance weighted | 19 | 0.026 | 0.017 | 0.135 | -0.008 | 0.059 | 1.026 | 0.992 | 1.061 |
| GCST90001598 | TBNK___DN (CD4-CD8-) AC | spontaneous abortion | Inverse variance weighted | 20 | 0.000 | 0.020 | 0.996 | -0.038 | 0.038 | 1.000 | 0.962 | 1.039 |
| GCST90001599 | TBNK___DN (CD4-CD8-) %T cell | spontaneous abortion | Inverse variance weighted | 15 | -0.009 | 0.029 | 0.753 | -0.065 | 0.047 | 0.991 | 0.937 | 1.048 |
| GCST90001600 | TBNK___Leukocyte AC | spontaneous abortion | Inverse variance weighted | 11 | 0.002 | 0.011 | 0.851 | -0.020 | 0.024 | 1.002 | 0.980 | 1.025 |
| GCST90001601 | TBNK___Lymphocyte AC | spontaneous abortion | Inverse variance weighted | 19 | 0.000 | 0.021 | 0.998 | -0.041 | 0.041 | 1.000 | 0.960 | 1.042 |
| GCST90001602 | TBNK___Lymphocyte %leukocyte | spontaneous abortion | Inverse variance weighted | 22 | -0.012 | 0.014 | 0.406 | -0.039 | 0.016 | 0.989 | 0.962 | 1.016 |
| GCST90001603 | TBNK___T cell AC | spontaneous abortion | Inverse variance weighted | 17 | 0.003 | 0.017 | 0.855 | -0.030 | 0.037 | 1.003 | 0.970 | 1.037 |
| GCST90001604 | TBNK___T cell %lymphocyte | spontaneous abortion | Inverse variance weighted | 17 | -0.025 | 0.020 | 0.226 | -0.064 | 0.015 | 0.976 | 0.938 | 1.015 |
| GCST90001605 | TBNK___T cell %leukocyte | spontaneous abortion | Inverse variance weighted | 17 | -0.015 | 0.012 | 0.229 | -0.039 | 0.009 | 0.985 | 0.962 | 1.009 |
| GCST90001606 | TBNK___CD4+ %leukocyte | spontaneous abortion | Inverse variance weighted | 13 | -0.044 | 0.033 | 0.177 | -0.108 | 0.020 | 0.957 | 0.897 | 1.020 |
| GCST90001607 | TBNK___CD8br %leukocyte | spontaneous abortion | Inverse variance weighted | 16 | 0.004 | 0.021 | 0.867 | -0.038 | 0.045 | 1.004 | 0.963 | 1.046 |
| GCST90001608 | TBNK___DP (CD4+CD8+) %leukocyte | spontaneous abortion | Inverse variance weighted | 22 | -0.038 | 0.022 | 0.090 | -0.081 | 0.006 | 0.963 | 0.922 | 1.006 |
| GCST90001609 | TBNK___CD4+ CD8dim AC | spontaneous abortion | Inverse variance weighted | 15 | 0.018 | 0.016 | 0.257 | -0.013 | 0.050 | 1.019 | 0.987 | 1.051 |
| GCST90001610 | TBNK___CD4+ CD8dim %lymphocyte | spontaneous abortion | Inverse variance weighted | 19 | -0.002 | 0.019 | 0.930 | -0.038 | 0.035 | 0.998 | 0.963 | 1.035 |
| GCST90001611 | TBNK___CD4+ CD8dim %leukocyte | spontaneous abortion | Inverse variance weighted | 14 | 0.016 | 0.023 | 0.494 | -0.029 | 0.060 | 1.016 | 0.971 | 1.062 |
| GCST90001612 | TBNK___CD8dim %leukocyte | spontaneous abortion | Inverse variance weighted | 18 | 0.018 | 0.016 | 0.279 | -0.014 | 0.050 | 1.018 | 0.986 | 1.051 |
| GCST90001613 | TBNK___DN (CD4-CD8-) %leukocyte | spontaneous abortion | Inverse variance weighted | 20 | -0.008 | 0.010 | 0.423 | -0.028 | 0.012 | 0.992 | 0.973 | 1.012 |
| GCST90001614 | TBNK___CD8br and CD8dim %leukocyte | spontaneous abortion | Inverse variance weighted | 14 | 0.008 | 0.025 | 0.745 | -0.041 | 0.058 | 1.008 | 0.960 | 1.059 |
| GCST90001615 | TBNK___TCRgd AC | spontaneous abortion | Inverse variance weighted | 19 | -0.029 | 0.017 | 0.097 | -0.062 | 0.005 | 0.972 | 0.940 | 1.005 |
| GCST90001616 | TBNK___TCRgd %T cell | spontaneous abortion | Inverse variance weighted | 18 | 0.009 | 0.011 | 0.396 | -0.012 | 0.030 | 1.009 | 0.988 | 1.030 |
| GCST90001617 | TBNK___TCRgd %lymphocyte | spontaneous abortion | Inverse variance weighted | 20 | 0.004 | 0.009 | 0.665 | -0.013 | 0.021 | 1.004 | 0.987 | 1.021 |
| GCST90001618 | TBNK___HLA DR+ T cell AC | spontaneous abortion | Inverse variance weighted | 30 | 0.004 | 0.009 | 0.668 | -0.014 | 0.021 | 1.004 | 0.986 | 1.021 |
| GCST90001619 | TBNK___HLA DR+ T cell%T cell | spontaneous abortion | Inverse variance weighted | 31 | 0.002 | 0.009 | 0.787 | -0.015 | 0.020 | 1.002 | 0.985 | 1.020 |
| GCST90001620 | TBNK___HLA DR+ T cell%lymphocyte | spontaneous abortion | Inverse variance weighted | 25 | -0.003 | 0.012 | 0.837 | -0.027 | 0.022 | 0.997 | 0.974 | 1.022 |
| GCST90001621 | TBNK___NKT AC | spontaneous abortion | Inverse variance weighted | 34 | 0.007 | 0.015 | 0.658 | -0.023 | 0.036 | 1.007 | 0.978 | 1.037 |
| GCST90001622 | TBNK___NKT %T cell | spontaneous abortion | Inverse variance weighted | 32 | 0.000 | 0.012 | 0.999 | -0.023 | 0.023 | 1.000 | 0.978 | 1.023 |
| GCST90001623 | TBNK___NKT %lymphocyte | spontaneous abortion | Inverse variance weighted | 33 | -0.003 | 0.013 | 0.839 | -0.028 | 0.022 | 0.997 | 0.973 | 1.023 |
| GCST90001624 | TBNK___HLA DR+ CD4+ AC | spontaneous abortion | Inverse variance weighted | 24 | 0.005 | 0.008 | 0.527 | -0.011 | 0.021 | 1.005 | 0.989 | 1.021 |
| GCST90001625 | TBNK___HLA DR+ CD4+ %T cell | spontaneous abortion | Inverse variance weighted | 25 | -0.013 | 0.020 | 0.511 | -0.053 | 0.026 | 0.987 | 0.949 | 1.027 |
| GCST90001626 | TBNK___HLA DR+ CD4+ %lymphocyte | spontaneous abortion | Inverse variance weighted | 21 | -0.027 | 0.027 | 0.322 | -0.080 | 0.026 | 0.974 | 0.924 | 1.027 |
| GCST90001627 | TBNK___HLA DR+ CD8br AC | spontaneous abortion | Inverse variance weighted | 34 | -0.003 | 0.008 | 0.690 | -0.020 | 0.013 | 0.997 | 0.981 | 1.013 |
| GCST90001628 | TBNK___HLA DR+ CD8br %T cell | spontaneous abortion | Inverse variance weighted | 30 | -0.001 | 0.009 | 0.943 | -0.017 | 0.016 | 0.999 | 0.983 | 1.016 |
| GCST90001629 | TBNK___HLA DR+ CD8br %lymphocyte | spontaneous abortion | Inverse variance weighted | 30 | 0.010 | 0.011 | 0.385 | -0.012 | 0.032 | 1.010 | 0.988 | 1.033 |
| GCST90001630 | TBNK___CD8br NKT AC | spontaneous abortion | Inverse variance weighted | 26 | 0.031 | 0.017 | 0.066 | -0.002 | 0.064 | 1.031 | 0.998 | 1.066 |
| GCST90001631 | TBNK___CD8br NKT %T cell | spontaneous abortion | Inverse variance weighted | 27 | 0.022 | 0.016 | 0.158 | -0.009 | 0.054 | 1.023 | 0.991 | 1.055 |
| GCST90001632 | TBNK___CD8br NKT %lymphocyte | spontaneous abortion | Inverse variance weighted | 26 | 0.028 | 0.017 | 0.099 | -0.005 | 0.061 | 1.028 | 0.995 | 1.063 |
| GCST90001633 | TBNK___CD8dim NKT AC | spontaneous abortion | Inverse variance weighted | 27 | 0.004 | 0.012 | 0.728 | -0.020 | 0.028 | 1.004 | 0.981 | 1.028 |
| GCST90001634 | TBNK___CD8dim NKT %T cell | spontaneous abortion | Inverse variance weighted | 19 | -0.007 | 0.016 | 0.673 | -0.039 | 0.025 | 0.993 | 0.962 | 1.026 |
| GCST90001635 | TBNK___CD8dim NKT %lymphocyte | spontaneous abortion | Inverse variance weighted | 26 | -0.003 | 0.014 | 0.827 | -0.030 | 0.024 | 0.997 | 0.970 | 1.024 |
| GCST90001636 | TBNK___DN (CD4-CD8-) NKT AC | spontaneous abortion | Inverse variance weighted | 10 | -0.019 | 0.029 | 0.518 | -0.075 | 0.038 | 0.982 | 0.928 | 1.038 |
| GCST90001637 | TBNK___DN (CD4-CD8-) NKT %T cell | spontaneous abortion | Inverse variance weighted | 30 | 0.007 | 0.015 | 0.632 | -0.023 | 0.038 | 1.007 | 0.977 | 1.039 |
| GCST90001638 | TBNK___DN (CD4-CD8-) NKT %lymphocyte | spontaneous abortion | Inverse variance weighted | 29 | -0.008 | 0.016 | 0.620 | -0.039 | 0.023 | 0.992 | 0.962 | 1.024 |
| GCST90001639 | TBNK___CD3- lymphocyte AC | spontaneous abortion | Inverse variance weighted | 18 | 0.010 | 0.020 | 0.631 | -0.030 | 0.049 | 1.010 | 0.971 | 1.050 |
| GCST90001640 | TBNK___CD3- lymphocyte %lymphocyte | spontaneous abortion | Inverse variance weighted | 6 | -0.030 | 0.055 | 0.584 | -0.137 | 0.077 | 0.970 | 0.872 | 1.080 |
| GCST90001641 | TBNK___CD3- lymphocyte %leukocyte | spontaneous abortion | Inverse variance weighted | 20 | 0.000 | 0.016 | 0.994 | -0.030 | 0.031 | 1.000 | 0.970 | 1.031 |
| GCST90001642 | TBNK___B cell AC | spontaneous abortion | Inverse variance weighted | 30 | 0.015 | 0.015 | 0.331 | -0.015 | 0.045 | 1.015 | 0.985 | 1.046 |
| GCST90001643 | TBNK___B cell % CD3- lymphocyte | spontaneous abortion | Inverse variance weighted | 29 | 0.009 | 0.008 | 0.251 | -0.006 | 0.025 | 1.009 | 0.994 | 1.025 |
| GCST90001644 | TBNK___B cell %lymphocyte | spontaneous abortion | Inverse variance weighted | 34 | 0.010 | 0.014 | 0.448 | -0.017 | 0.038 | 1.011 | 0.984 | 1.038 |
| GCST90001645 | TBNK___NK AC | spontaneous abortion | Inverse variance weighted | 22 | 0.027 | 0.017 | 0.112 | -0.006 | 0.060 | 1.027 | 0.994 | 1.062 |
| GCST90001646 | TBNK___NK %CD3- lymphocyte | spontaneous abortion | Inverse variance weighted | 27 | -0.012 | 0.009 | 0.192 | -0.029 | 0.006 | 0.988 | 0.971 | 1.006 |
| GCST90001647 | TBNK___NK %lymphocyte | spontaneous abortion | Inverse variance weighted | 27 | -0.014 | 0.012 | 0.235 | -0.038 | 0.009 | 0.986 | 0.962 | 1.009 |
| GCST90001648 | TBNK___HLA DR+ NK AC | spontaneous abortion | Inverse variance weighted | 18 | -0.004 | 0.022 | 0.870 | -0.047 | 0.040 | 0.996 | 0.954 | 1.041 |
| GCST90001649 | TBNK___HLA DR+ NK %NK | spontaneous abortion | Inverse variance weighted | 23 | -0.022 | 0.014 | 0.100 | -0.049 | 0.004 | 0.978 | 0.952 | 1.004 |
| GCST90001650 | TBNK___HLA DR+ NK %CD3- lymphocyte | spontaneous abortion | Inverse variance weighted | 23 | -0.019 | 0.017 | 0.250 | -0.052 | 0.014 | 0.981 | 0.950 | 1.014 |
| GCST90001651 | TBNK___Granulocyte AC | spontaneous abortion | Inverse variance weighted | 24 | 0.011 | 0.017 | 0.507 | -0.022 | 0.044 | 1.011 | 0.978 | 1.045 |
| GCST90001652 | TBNK___Granulocyte %leukocyte | spontaneous abortion | Inverse variance weighted | 25 | 0.031 | 0.013 | 0.017 | 0.006 | 0.057 | 1.032 | 1.006 | 1.059 |
| GCST90001653 | Treg___CD28- CD4-CD8- T cell （%CD4-CD8- T cell） | spontaneous abortion | Inverse variance weighted | 27 | 0.029 | 0.013 | 0.022 | 0.004 | 0.054 | 1.030 | 1.004 | 1.056 |
| GCST90001654 | Treg___CD28- DN (CD4-CD8-) AC | spontaneous abortion | Inverse variance weighted | 31 | 0.028 | 0.016 | 0.072 | -0.003 | 0.060 | 1.029 | 0.997 | 1.061 |
| GCST90001655 | Treg___CD28+ DN (CD4-CD8-) %T cell | spontaneous abortion | Inverse variance weighted | 23 | -0.034 | 0.018 | 0.064 | -0.069 | 0.002 | 0.967 | 0.933 | 1.002 |
| GCST90001656 | Treg___CD28+ DN (CD4-CD8-) %DN | spontaneous abortion | Inverse variance weighted | 27 | -0.029 | 0.013 | 0.022 | -0.054 | -0.004 | 0.971 | 0.947 | 0.996 |
| GCST90001657 | Treg___CD28+ DN (CD4-CD8-) AC | spontaneous abortion | Inverse variance weighted | 12 | -0.001 | 0.027 | 0.982 | -0.054 | 0.053 | 0.999 | 0.947 | 1.054 |
| GCST90001658 | Treg___CD39+ CD4+ %T cell | spontaneous abortion | Inverse variance weighted | 31 | -0.011 | 0.008 | 0.168 | -0.026 | 0.005 | 0.989 | 0.974 | 1.005 |
| GCST90001659 | Treg___CD39+ CD4+ %CD4+ | spontaneous abortion | Inverse variance weighted | 25 | -0.002 | 0.010 | 0.819 | -0.023 | 0.018 | 0.998 | 0.978 | 1.018 |
| GCST90001660 | Treg___CD39+ CD4+ AC | spontaneous abortion | Inverse variance weighted | 29 | 0.007 | 0.008 | 0.438 | -0.010 | 0.023 | 1.007 | 0.990 | 1.024 |
| GCST90001661 | Treg___CD28- CD8dim %T cell | spontaneous abortion | Inverse variance weighted | 25 | -0.003 | 0.012 | 0.806 | -0.027 | 0.021 | 0.997 | 0.973 | 1.022 |
| GCST90001662 | Treg___CD28- CD8dim %CD8dim | spontaneous abortion | Inverse variance weighted | 15 | 0.013 | 0.005 | 0.010 | 0.003 | 0.022 | 1.013 | 1.003 | 1.023 |
| GCST90001663 | Treg___CD28- CD8dim AC | spontaneous abortion | Inverse variance weighted | 28 | -0.010 | 0.011 | 0.328 | -0.031 | 0.010 | 0.990 | 0.969 | 1.010 |
| GCST90001664 | Treg___CD28+ CD45RA+ CD8dim %T cell | spontaneous abortion | Inverse variance weighted | 38 | 0.001 | 0.003 | 0.746 | -0.006 | 0.008 | 1.001 | 0.995 | 1.008 |
| GCST90001665 | Treg___CD28+ CD45RA+ CD8dim %CD8dim | spontaneous abortion | Inverse variance weighted | 27 | -0.006 | 0.007 | 0.413 | -0.020 | 0.008 | 0.994 | 0.980 | 1.008 |
| GCST90001666 | Treg___CD28+ CD45RA+ CD8dim AC | spontaneous abortion | Inverse variance weighted | 49 | -0.004 | 0.002 | 0.083 | -0.008 | 0.000 | 0.996 | 0.992 | 1.000 |
| GCST90001667 | Treg___CD28+ CD45RA- CD8dim %T cell | spontaneous abortion | Inverse variance weighted | 28 | -0.006 | 0.004 | 0.172 | -0.015 | 0.003 | 0.994 | 0.985 | 1.003 |
| GCST90001668 | Treg___CD28+ CD45RA- CD8dim %CD8dim | spontaneous abortion | Inverse variance weighted | 28 | 0.002 | 0.008 | 0.766 | -0.014 | 0.019 | 1.002 | 0.986 | 1.019 |
| GCST90001669 | Treg___CD28+ CD45RA- CD8dim AC | spontaneous abortion | Inverse variance weighted | 36 | 0.005 | 0.003 | 0.097 | -0.001 | 0.010 | 1.005 | 0.999 | 1.010 |
| GCST90001670 | Treg___CD39+ CD8br %T cell | spontaneous abortion | Inverse variance weighted | 20 | 0.026 | 0.016 | 0.117 | -0.006 | 0.058 | 1.026 | 0.994 | 1.059 |
| GCST90001671 | Treg___CD39+ CD8br %CD8br | spontaneous abortion | Inverse variance weighted | 21 | 0.002 | 0.012 | 0.835 | -0.020 | 0.025 | 1.002 | 0.980 | 1.026 |
| GCST90001672 | Treg___CD39+ CD8br AC | spontaneous abortion | Inverse variance weighted | 24 | 0.008 | 0.011 | 0.473 | -0.014 | 0.031 | 1.008 | 0.986 | 1.031 |
| GCST90001673 | Treg___CD28- CD127- CD25++ CD8br %T cell | spontaneous abortion | Inverse variance weighted | 18 | 0.035 | 0.015 | 0.025 | 0.004 | 0.065 | 1.035 | 1.004 | 1.067 |
| GCST90001674 | Treg___CD28- CD127- CD25++ CD8br %CD8br | spontaneous abortion | Inverse variance weighted | 18 | 0.016 | 0.017 | 0.349 | -0.017 | 0.048 | 1.016 | 0.983 | 1.050 |
| GCST90001675 | Treg___CD28- CD127- CD25++ CD8br AC | spontaneous abortion | Inverse variance weighted | 29 | 0.012 | 0.010 | 0.215 | -0.007 | 0.031 | 1.012 | 0.993 | 1.032 |
| GCST90001676 | Treg___CD28- CD25++ CD8br %T cell | spontaneous abortion | Inverse variance weighted | 8 | 0.059 | 0.032 | 0.063 | -0.003 | 0.122 | 1.061 | 0.997 | 1.130 |
| GCST90001677 | Treg___CD28- CD25++ CD8br %CD8br | spontaneous abortion | Inverse variance weighted | 25 | 0.018 | 0.018 | 0.327 | -0.018 | 0.053 | 1.018 | 0.982 | 1.055 |
| GCST90001678 | Treg___CD28- CD25++ CD8br AC | spontaneous abortion | Inverse variance weighted | 25 | -0.001 | 0.010 | 0.955 | -0.021 | 0.020 | 0.999 | 0.979 | 1.020 |
| GCST90001679 | Treg___CD25++ CD8br %T cell | spontaneous abortion | Inverse variance weighted | 17 | 0.049 | 0.020 | 0.016 | 0.009 | 0.089 | 1.050 | 1.009 | 1.093 |
| GCST90001680 | Treg___CD25++ CD8br %CD8br | spontaneous abortion | Inverse variance weighted | 22 | 0.016 | 0.018 | 0.367 | -0.019 | 0.050 | 1.016 | 0.982 | 1.051 |
| GCST90001681 | Treg___CD25++ CD8br AC | spontaneous abortion | Inverse variance weighted | 27 | -0.005 | 0.019 | 0.812 | -0.042 | 0.033 | 0.995 | 0.959 | 1.033 |
| GCST90001682 | Treg___CD127- CD8br %T cell | spontaneous abortion | Inverse variance weighted | 14 | 0.035 | 0.022 | 0.109 | -0.008 | 0.079 | 1.036 | 0.992 | 1.082 |
| GCST90001683 | Treg___CD127- CD8br %CD8br | spontaneous abortion | Inverse variance weighted | 14 | -0.010 | 0.014 | 0.463 | -0.038 | 0.017 | 0.990 | 0.963 | 1.018 |
| GCST90001684 | Treg___CD127- CD8br AC | spontaneous abortion | Inverse variance weighted | 13 | -0.013 | 0.017 | 0.457 | -0.047 | 0.021 | 0.987 | 0.954 | 1.021 |
| GCST90001685 | Treg___CD28- CD8br %T cell | spontaneous abortion | Inverse variance weighted | 16 | 0.023 | 0.022 | 0.292 | -0.020 | 0.067 | 1.024 | 0.980 | 1.069 |
| GCST90001686 | Treg___CD28- CD8br %CD8br | spontaneous abortion | Inverse variance weighted | 23 | -0.001 | 0.019 | 0.955 | -0.038 | 0.036 | 0.999 | 0.963 | 1.037 |
| GCST90001687 | Treg___CD28- CD8br AC | spontaneous abortion | Inverse variance weighted | 14 | 0.002 | 0.025 | 0.930 | -0.048 | 0.052 | 1.002 | 0.953 | 1.054 |
| GCST90001688 | Treg___CD28+ CD45RA+ CD8br %T cell | spontaneous abortion | Inverse variance weighted | 88 | -0.004 | 0.001 | 0.013 | -0.006 | -0.001 | 0.996 | 0.994 | 0.999 |
| GCST90001689 | Treg___CD28+ CD45RA+ CD8br %CD8br | spontaneous abortion | Inverse variance weighted | 36 | 0.004 | 0.004 | 0.284 | -0.003 | 0.011 | 1.004 | 0.997 | 1.011 |
| GCST90001690 | Treg___CD28+ CD45RA+ CD8br AC | spontaneous abortion | Inverse variance weighted | 54 | -0.005 | 0.002 | 0.031 | -0.009 | 0.000 | 0.995 | 0.991 | 1.000 |
| GCST90001691 | Treg___CD28+ CD45RA- CD8br %T cell | spontaneous abortion | Inverse variance weighted | 26 | -0.007 | 0.005 | 0.198 | -0.017 | 0.003 | 0.993 | 0.984 | 1.003 |
| GCST90001692 | Treg___CD28+ CD45RA- CD8br %CD8br | spontaneous abortion | Inverse variance weighted | 26 | -0.003 | 0.004 | 0.468 | -0.012 | 0.006 | 0.997 | 0.988 | 1.006 |
| GCST90001693 | Treg___CD28+ CD45RA- CD8br AC | spontaneous abortion | Inverse variance weighted | 29 | -0.011 | 0.007 | 0.092 | -0.024 | 0.002 | 0.989 | 0.976 | 1.002 |
| GCST90001694 | Treg___CD28- CD4-CD8- T cell (%T cell) | spontaneous abortion | Inverse variance weighted | 22 | 0.031 | 0.014 | 0.028 | 0.003 | 0.059 | 1.032 | 1.003 | 1.061 |
| GCST90001695 | Treg___CD45RA- CD28- CD8br AC | spontaneous abortion | Inverse variance weighted | 333 | 0.000 | 0.000 | 0.933 | 0.000 | 0.000 | 1.000 | 1.000 | 1.000 |
| GCST90001696 | Treg___CD45RA- CD28- CD8br %CD8br | spontaneous abortion | Inverse variance weighted | 49 | 0.000 | 0.000 | 0.643 | 0.000 | 0.001 | 1.000 | 1.000 | 1.001 |
| GCST90001697 | Treg___CD45RA- CD28- CD8br %T cell | spontaneous abortion | Inverse variance weighted | 175 | 0.000 | 0.000 | 0.661 | 0.000 | 0.000 | 1.000 | 1.000 | 1.000 |
| GCST90001698 | Treg___CD45RA+ CD28- CD8br AC | spontaneous abortion | Inverse variance weighted | 712 | 0.000 | 0.000 | 0.553 | 0.000 | 0.000 | 1.000 | 1.000 | 1.000 |
| GCST90001699 | Treg___CD45RA+ CD28- CD8br %CD8br | spontaneous abortion | Inverse variance weighted | 30 | 0.000 | 0.000 | 0.269 | -0.001 | 0.000 | 1.000 | 0.999 | 1.000 |
| GCST90001700 | Treg___CD45RA+ CD28- CD8br %T cell | spontaneous abortion | Inverse variance weighted | 200 | 0.000 | 0.000 | 0.035 | -0.001 | -2.097 | 1.000 | 0.999 | 1.000 |
| GCST90001701 | B cell___BAFF-R on CD20- CD38- | spontaneous abortion | Inverse variance weighted | 17 | 0.005 | 0.015 | 0.729 | -0.024 | 0.034 | 1.005 | 0.976 | 1.035 |
| GCST90001702 | B cell___BAFF-R on CD24+ CD27+ | spontaneous abortion | Inverse variance weighted | 19 | 0.007 | 0.009 | 0.440 | -0.011 | 0.026 | 1.007 | 0.989 | 1.026 |
| GCST90001703 | B cell___BAFF-R on IgD+ CD24+ | spontaneous abortion | Inverse variance weighted | 18 | -0.001 | 0.010 | 0.905 | -0.020 | 0.018 | 0.999 | 0.980 | 1.018 |
| GCST90001704 | B cell___BAFF-R on IgD+ CD24- | spontaneous abortion | Inverse variance weighted | 22 | -0.001 | 0.009 | 0.886 | -0.020 | 0.017 | 0.999 | 0.980 | 1.017 |
| GCST90001705 | B cell___BAFF-R on IgD+ CD38- | spontaneous abortion | Inverse variance weighted | 22 | 0.002 | 0.010 | 0.864 | -0.019 | 0.022 | 1.002 | 0.982 | 1.022 |
| GCST90001706 | B cell___BAFF-R on IgD+ CD38- naive | spontaneous abortion | Inverse variance weighted | 28 | 0.011 | 0.009 | 0.219 | -0.007 | 0.029 | 1.011 | 0.993 | 1.029 |
| GCST90001707 | B cell___BAFF-R on IgD+ CD38- unsw mem | spontaneous abortion | Inverse variance weighted | 19 | 0.009 | 0.011 | 0.425 | -0.013 | 0.030 | 1.009 | 0.987 | 1.031 |
| GCST90001708 | B cell___BAFF-R on IgD+ CD38br | spontaneous abortion | Inverse variance weighted | 27 | 0.005 | 0.009 | 0.598 | -0.014 | 0.024 | 1.005 | 0.987 | 1.024 |
| GCST90001709 | B cell___BAFF-R on IgD+ CD38dim | spontaneous abortion | Inverse variance weighted | 25 | 0.004 | 0.008 | 0.610 | -0.012 | 0.021 | 1.004 | 0.988 | 1.021 |
| GCST90001710 | B cell___BAFF-R on IgD- CD24- | spontaneous abortion | Inverse variance weighted | 22 | 0.010 | 0.012 | 0.397 | -0.013 | 0.033 | 1.010 | 0.987 | 1.033 |
| GCST90001711 | B cell___BAFF-R on IgD- CD27- | spontaneous abortion | Inverse variance weighted | 18 | 0.009 | 0.010 | 0.359 | -0.010 | 0.028 | 1.009 | 0.990 | 1.029 |
| GCST90001712 | B cell___BAFF-R on IgD- CD38- | spontaneous abortion | Inverse variance weighted | 17 | 0.007 | 0.010 | 0.504 | -0.013 | 0.026 | 1.007 | 0.987 | 1.026 |
| GCST90001713 | B cell___BAFF-R on IgD- CD38br | spontaneous abortion | Inverse variance weighted | 15 | -0.009 | 0.019 | 0.639 | -0.046 | 0.028 | 0.991 | 0.955 | 1.029 |
| GCST90001714 | B cell___BAFF-R on IgD- CD38dim | spontaneous abortion | Inverse variance weighted | 4 | -0.006 | 0.023 | 0.810 | -0.051 | 0.040 | 0.995 | 0.951 | 1.040 |
| GCST90001715 | B cell___BAFF-R on memory B cell | spontaneous abortion | Inverse variance weighted | 17 | -0.002 | 0.010 | 0.836 | -0.022 | 0.018 | 0.998 | 0.978 | 1.018 |
| GCST90001716 | B cell___BAFF-R on naive-mature B cell | spontaneous abortion | Inverse variance weighted | 23 | -0.002 | 0.009 | 0.856 | -0.020 | 0.016 | 0.998 | 0.981 | 1.016 |
| GCST90001717 | B cell___BAFF-R on unsw mem | spontaneous abortion | Inverse variance weighted | 24 | 0.004 | 0.010 | 0.666 | -0.015 | 0.024 | 1.004 | 0.985 | 1.024 |
| GCST90001718 | B cell___BAFF-R on sw mem | spontaneous abortion | Inverse variance weighted | 19 | 0.006 | 0.010 | 0.544 | -0.014 | 0.026 | 1.006 | 0.986 | 1.026 |
| GCST90001719 | B cell___BAFF-R on IgD+ | spontaneous abortion | Inverse variance weighted | 24 | 0.002 | 0.010 | 0.833 | -0.017 | 0.021 | 1.002 | 0.983 | 1.021 |
| GCST90001720 | B cell___BAFF-R on transitional | spontaneous abortion | Inverse variance weighted | 24 | 0.001 | 0.010 | 0.880 | -0.018 | 0.021 | 1.001 | 0.983 | 1.021 |
| GCST90001721 | B cell___CD19 on CD20- | spontaneous abortion | Inverse variance weighted | 22 | -0.014 | 0.017 | 0.396 | -0.047 | 0.019 | 0.986 | 0.954 | 1.019 |
| GCST90001722 | B cell___CD19 on CD20- CD38- | spontaneous abortion | Inverse variance weighted | 19 | -0.014 | 0.018 | 0.431 | -0.049 | 0.021 | 0.986 | 0.952 | 1.021 |
| GCST90001723 | B cell___CD19 on CD24+ CD27+ | spontaneous abortion | Inverse variance weighted | 29 | 0.001 | 0.012 | 0.931 | -0.022 | 0.024 | 1.001 | 0.978 | 1.024 |
| GCST90001724 | B cell___CD19 on IgD+ CD24+ | spontaneous abortion | Inverse variance weighted | 33 | 0.001 | 0.009 | 0.869 | -0.016 | 0.019 | 1.001 | 0.984 | 1.019 |
| GCST90001725 | B cell___CD19 on IgD+ CD24- | spontaneous abortion | Inverse variance weighted | 25 | 0.006 | 0.007 | 0.398 | -0.008 | 0.020 | 1.006 | 0.992 | 1.020 |
| GCST90001726 | B cell___CD19 on IgD+ CD38- | spontaneous abortion | Inverse variance weighted | 31 | 0.004 | 0.007 | 0.544 | -0.010 | 0.019 | 1.004 | 0.990 | 1.019 |
| GCST90001727 | B cell___CD19 on IgD+ CD38- naive | spontaneous abortion | Inverse variance weighted | 19 | -0.003 | 0.009 | 0.767 | -0.020 | 0.015 | 0.997 | 0.980 | 1.015 |
| GCST90001728 | B cell___CD19 on IgD+ CD38- unsw mem | spontaneous abortion | Inverse variance weighted | 21 | 0.007 | 0.007 | 0.336 | -0.007 | 0.020 | 1.007 | 0.993 | 1.021 |
| GCST90001729 | B cell___CD19 on IgD+ CD38br | spontaneous abortion | Inverse variance weighted | 21 | -0.010 | 0.014 | 0.439 | -0.037 | 0.016 | 0.990 | 0.964 | 1.016 |
| GCST90001730 | B cell___CD19 on IgD+ CD38dim | spontaneous abortion | Inverse variance weighted | 24 | 0.002 | 0.007 | 0.782 | -0.012 | 0.016 | 1.002 | 0.988 | 1.016 |
| GCST90001731 | B cell___CD19 on IgD- CD24- | spontaneous abortion | Inverse variance weighted | 23 | -0.005 | 0.020 | 0.807 | -0.044 | 0.035 | 0.995 | 0.957 | 1.035 |
| GCST90001732 | B cell___CD19 on IgD- CD27- | spontaneous abortion | Inverse variance weighted | 26 | -0.026 | 0.017 | 0.126 | -0.060 | 0.007 | 0.974 | 0.942 | 1.007 |
| GCST90001733 | B cell___CD19 on IgD- CD38- | spontaneous abortion | Inverse variance weighted | 22 | 0.019 | 0.018 | 0.301 | -0.017 | 0.054 | 1.019 | 0.983 | 1.056 |
| GCST90001734 | B cell___CD19 on IgD- CD38br | spontaneous abortion | Inverse variance weighted | 18 | 0.001 | 0.017 | 0.974 | -0.032 | 0.033 | 1.001 | 0.968 | 1.034 |
| GCST90001735 | B cell___CD19 on IgD- CD38dim | spontaneous abortion | Inverse variance weighted | 27 | -0.006 | 0.013 | 0.638 | -0.031 | 0.019 | 0.994 | 0.970 | 1.019 |
| GCST90001736 | B cell___CD19 on memory B cell | spontaneous abortion | Inverse variance weighted | 24 | 0.005 | 0.015 | 0.759 | -0.024 | 0.033 | 1.005 | 0.976 | 1.034 |
| GCST90001737 | B cell___CD19 on naive-mature B cell | spontaneous abortion | Inverse variance weighted | 28 | 0.003 | 0.007 | 0.665 | -0.011 | 0.018 | 1.003 | 0.989 | 1.018 |
| GCST90001738 | B cell___CD19 on unsw mem | spontaneous abortion | Inverse variance weighted | 21 | -0.002 | 0.011 | 0.834 | -0.023 | 0.019 | 0.998 | 0.977 | 1.019 |
| GCST90001739 | B cell___CD19 on PB/PC | spontaneous abortion | Inverse variance weighted | 23 | -0.005 | 0.024 | 0.825 | -0.052 | 0.041 | 0.995 | 0.950 | 1.042 |
| GCST90001740 | B cell___CD19 on sw mem | spontaneous abortion | Inverse variance weighted | 27 | 0.022 | 0.016 | 0.161 | -0.009 | 0.052 | 1.022 | 0.991 | 1.054 |
| GCST90001741 | B cell___CD19 on IgD+ | spontaneous abortion | Inverse variance weighted | 27 | 0.006 | 0.007 | 0.353 | -0.007 | 0.020 | 1.006 | 0.993 | 1.020 |
| GCST90001742 | B cell___CD19 on transitional | spontaneous abortion | Inverse variance weighted | 26 | -0.014 | 0.012 | 0.231 | -0.037 | 0.009 | 0.986 | 0.963 | 1.009 |
| GCST90001743 | B cell___CD20 on B cell | spontaneous abortion | Inverse variance weighted | 23 | -0.020 | 0.014 | 0.170 | -0.048 | 0.008 | 0.980 | 0.953 | 1.009 |
| GCST90001744 | B cell___CD20 on CD20- CD38- | spontaneous abortion | Inverse variance weighted | 16 | -0.008 | 0.017 | 0.635 | -0.042 | 0.026 | 0.992 | 0.959 | 1.026 |
| GCST90001745 | B cell___CD20 on CD24+ CD27+ | spontaneous abortion | Inverse variance weighted | 29 | -0.013 | 0.014 | 0.345 | -0.039 | 0.014 | 0.987 | 0.961 | 1.014 |
| GCST90001746 | B cell___CD20 on IgD+ CD24+ | spontaneous abortion | Inverse variance weighted | 23 | -0.026 | 0.015 | 0.083 | -0.056 | 0.003 | 0.974 | 0.946 | 1.003 |
| GCST90001747 | B cell___CD20 on IgD+ CD24- | spontaneous abortion | Inverse variance weighted | 23 | 0.001 | 0.008 | 0.922 | -0.015 | 0.017 | 1.001 | 0.985 | 1.017 |
| GCST90001748 | B cell___CD20 on IgD+ CD38- | spontaneous abortion | Inverse variance weighted | 25 | 0.001 | 0.012 | 0.944 | -0.023 | 0.025 | 1.001 | 0.977 | 1.025 |
| GCST90001749 | B cell___CD20 on IgD+ CD38- naive | spontaneous abortion | Inverse variance weighted | 16 | -0.014 | 0.015 | 0.375 | -0.044 | 0.016 | 0.987 | 0.957 | 1.017 |
| GCST90001750 | B cell___CD20 on IgD+ CD38- unsw mem | spontaneous abortion | Inverse variance weighted | 19 | -0.014 | 0.016 | 0.392 | -0.045 | 0.018 | 0.986 | 0.956 | 1.018 |
| GCST90001751 | B cell___CD20 on IgD+ CD38br | spontaneous abortion | Inverse variance weighted | 26 | -0.004 | 0.015 | 0.800 | -0.034 | 0.026 | 0.996 | 0.966 | 1.027 |
| GCST90001752 | B cell___CD20 on IgD+ CD38dim | spontaneous abortion | Inverse variance weighted | 27 | 0.012 | 0.014 | 0.388 | -0.015 | 0.039 | 1.012 | 0.985 | 1.040 |
| GCST90001753 | B cell___CD20 on IgD- CD24- | spontaneous abortion | Inverse variance weighted | 28 | 0.001 | 0.013 | 0.968 | -0.024 | 0.025 | 1.001 | 0.976 | 1.026 |
| GCST90001754 | B cell___CD20 on IgD- CD27- | spontaneous abortion | Inverse variance weighted | 19 | 0.026 | 0.017 | 0.141 | -0.009 | 0.060 | 1.026 | 0.992 | 1.062 |
| GCST90001755 | B cell___CD20 on IgD- CD38- | spontaneous abortion | Inverse variance weighted | 27 | 0.009 | 0.016 | 0.599 | -0.024 | 0.041 | 1.009 | 0.977 | 1.042 |
| GCST90001756 | B cell___CD20 on IgD- CD38br | spontaneous abortion | Inverse variance weighted | 16 | 0.008 | 0.008 | 0.359 | -0.009 | 0.024 | 1.008 | 0.991 | 1.024 |
| GCST90001757 | B cell___CD20 on IgD- CD38dim | spontaneous abortion | Inverse variance weighted | 34 | 0.003 | 0.004 | 0.444 | -0.005 | 0.012 | 1.003 | 0.995 | 1.012 |
| GCST90001758 | B cell___CD20 on memory B cell | spontaneous abortion | Inverse variance weighted | 28 | -0.010 | 0.012 | 0.415 | -0.034 | 0.014 | 0.990 | 0.966 | 1.014 |
| GCST90001759 | B cell___CD20 on naive-mature B cell | spontaneous abortion | Inverse variance weighted | 23 | -0.001 | 0.007 | 0.919 | -0.015 | 0.013 | 0.999 | 0.985 | 1.014 |
| GCST90001760 | B cell___CD20 on unsw mem | spontaneous abortion | Inverse variance weighted | 22 | -0.004 | 0.012 | 0.748 | -0.028 | 0.020 | 0.996 | 0.972 | 1.020 |
| GCST90001761 | B cell___CD20 on sw mem | spontaneous abortion | Inverse variance weighted | 31 | 0.003 | 0.012 | 0.812 | -0.021 | 0.027 | 1.003 | 0.979 | 1.027 |
| GCST90001762 | B cell___CD20 on IgD+ | spontaneous abortion | Inverse variance weighted | 19 | -0.004 | 0.008 | 0.575 | -0.020 | 0.011 | 0.996 | 0.980 | 1.011 |
| GCST90001763 | B cell___CD20 on transitional | spontaneous abortion | Inverse variance weighted | 22 | 0.002 | 0.006 | 0.702 | -0.009 | 0.013 | 1.002 | 0.991 | 1.013 |
| GCST90001764 | B cell___CD24 on CD24+ CD27+ | spontaneous abortion | Inverse variance weighted | 3 | 0.007 | 0.045 | 0.883 | -0.081 | 0.095 | 1.007 | 0.922 | 1.099 |
| GCST90001765 | B cell___CD24 on IgD+ CD24+ | spontaneous abortion | Inverse variance weighted | 25 | -0.008 | 0.008 | 0.287 | -0.023 | 0.007 | 0.992 | 0.977 | 1.007 |
| GCST90001766 | B cell___CD24 on IgD+ CD38- | spontaneous abortion | Inverse variance weighted | 21 | 0.023 | 0.010 | 0.022 | 0.003 | 0.043 | 1.024 | 1.003 | 1.044 |
| GCST90001767 | B cell___CD24 on IgD+ CD38- unsw mem | spontaneous abortion | Inverse variance weighted | 21 | 0.004 | 0.010 | 0.694 | -0.015 | 0.023 | 1.004 | 0.985 | 1.023 |
| GCST90001768 | B cell___CD24 on IgD+ CD38br | spontaneous abortion | Inverse variance weighted | 25 | 0.001 | 0.011 | 0.910 | -0.021 | 0.024 | 1.001 | 0.979 | 1.024 |
| GCST90001769 | B cell___CD24 on IgD- CD38- | spontaneous abortion | Inverse variance weighted | 29 | -0.006 | 0.009 | 0.512 | -0.024 | 0.012 | 0.994 | 0.977 | 1.012 |
| GCST90001770 | B cell___CD24 on IgD- CD38dim | spontaneous abortion | Inverse variance weighted | 7 | -0.024 | 0.030 | 0.425 | -0.081 | 0.034 | 0.977 | 0.922 | 1.035 |
| GCST90001771 | B cell___CD24 on memory B cell | spontaneous abortion | Inverse variance weighted | 31 | -0.002 | 0.009 | 0.813 | -0.020 | 0.016 | 0.998 | 0.980 | 1.016 |
| GCST90001772 | B cell___CD24 on unsw mem | spontaneous abortion | Inverse variance weighted | 25 | -0.013 | 0.008 | 0.130 | -0.029 | 0.004 | 0.987 | 0.971 | 1.004 |
| GCST90001773 | B cell___CD24 on sw mem | spontaneous abortion | Inverse variance weighted | 38 | 0.012 | 0.009 | 0.162 | -0.005 | 0.030 | 1.013 | 0.995 | 1.030 |
| GCST90001774 | B cell___CD24 on transitional | spontaneous abortion | Inverse variance weighted | 20 | -0.007 | 0.022 | 0.769 | -0.050 | 0.037 | 0.994 | 0.951 | 1.038 |
| GCST90001775 | B cell___CD25 on B cell | spontaneous abortion | Inverse variance weighted | 25 | 0.015 | 0.010 | 0.124 | -0.004 | 0.034 | 1.015 | 0.996 | 1.035 |
| GCST90001776 | B cell___CD25 on CD20- CD38- | spontaneous abortion | Inverse variance weighted | 19 | 0.004 | 0.018 | 0.811 | -0.030 | 0.039 | 1.004 | 0.970 | 1.040 |
| GCST90001777 | B cell___CD25 on CD24+ CD27+ | spontaneous abortion | Inverse variance weighted | 24 | 0.007 | 0.005 | 0.144 | -0.002 | 0.016 | 1.007 | 0.998 | 1.017 |
| GCST90001778 | B cell___CD25 on IgD+ CD24+ | spontaneous abortion | Inverse variance weighted | 26 | -0.003 | 0.009 | 0.741 | -0.021 | 0.015 | 0.997 | 0.979 | 1.015 |
| GCST90001779 | B cell___CD25 on IgD+ CD24- | spontaneous abortion | Inverse variance weighted | 24 | 0.013 | 0.009 | 0.165 | -0.005 | 0.032 | 1.013 | 0.995 | 1.032 |
| GCST90001780 | B cell___CD25 on IgD+ CD38- | spontaneous abortion | Inverse variance weighted | 28 | -0.002 | 0.006 | 0.797 | -0.014 | 0.010 | 0.998 | 0.987 | 1.010 |
| GCST90001781 | B cell___CD25 on IgD+ CD38- naive | spontaneous abortion | Inverse variance weighted | 25 | 0.008 | 0.010 | 0.451 | -0.013 | 0.028 | 1.008 | 0.987 | 1.029 |
| GCST90001782 | B cell___CD25 on IgD+ CD38- unsw mem | spontaneous abortion | Inverse variance weighted | 24 | -0.003 | 0.008 | 0.734 | -0.018 | 0.013 | 0.997 | 0.982 | 1.013 |
| GCST90001783 | B cell___CD25 on IgD+ CD38br | spontaneous abortion | Inverse variance weighted | 13 | 0.053 | 0.021 | 0.012 | 0.012 | 0.095 | 1.055 | 1.012 | 1.100 |
| GCST90001784 | B cell___CD25 on IgD+ CD38dim | spontaneous abortion | Inverse variance weighted | 23 | 0.016 | 0.009 | 0.079 | -0.002 | 0.034 | 1.016 | 0.998 | 1.034 |
| GCST90001785 | B cell___CD25 on IgD- CD24- | spontaneous abortion | Inverse variance weighted | 26 | 0.000 | 0.018 | 0.981 | -0.035 | 0.034 | 1.000 | 0.965 | 1.035 |
| GCST90001786 | B cell___CD25 on IgD- CD27- | spontaneous abortion | Inverse variance weighted | 21 | -0.007 | 0.020 | 0.722 | -0.047 | 0.033 | 0.993 | 0.954 | 1.033 |
| GCST90001787 | B cell___CD25 on IgD- CD38- | spontaneous abortion | Inverse variance weighted | 22 | -0.002 | 0.012 | 0.847 | -0.026 | 0.021 | 0.998 | 0.975 | 1.021 |
| GCST90001788 | B cell___CD25 on IgD- CD38br | spontaneous abortion | Inverse variance weighted | 19 | -0.008 | 0.023 | 0.728 | -0.054 | 0.038 | 0.992 | 0.947 | 1.038 |
| GCST90001789 | B cell___CD25 on IgD- CD38dim | spontaneous abortion | Inverse variance weighted | 20 | -0.053 | 0.016 | 0.001 | -0.083 | -0.022 | 0.949 | 0.920 | 0.978 |
| GCST90001790 | B cell___CD25 on memory B cell | spontaneous abortion | Inverse variance weighted | 24 | 0.000 | 0.011 | 0.994 | -0.022 | 0.022 | 1.000 | 0.978 | 1.023 |
| GCST90001791 | B cell___CD25 on naive-mature B cell | spontaneous abortion | Inverse variance weighted | 23 | 0.004 | 0.015 | 0.810 | -0.027 | 0.034 | 1.004 | 0.974 | 1.035 |
| GCST90001792 | B cell___CD25 on unsw mem | spontaneous abortion | Inverse variance weighted | 24 | -0.001 | 0.007 | 0.875 | -0.015 | 0.013 | 0.999 | 0.985 | 1.013 |
| GCST90001793 | B cell___CD25 on sw mem | spontaneous abortion | Inverse variance weighted | 20 | -0.033 | 0.020 | 0.107 | -0.072 | 0.007 | 0.968 | 0.930 | 1.007 |
| GCST90001794 | B cell___CD25 on IgD+ | spontaneous abortion | Inverse variance weighted | 27 | 0.010 | 0.009 | 0.287 | -0.008 | 0.028 | 1.010 | 0.992 | 1.029 |
| GCST90001795 | B cell___CD25 on transitional | spontaneous abortion | Inverse variance weighted | 22 | 0.047 | 0.016 | 0.003 | 0.016 | 0.078 | 1.048 | 1.016 | 1.081 |
| GCST90001796 | B cell___CD27 on CD20- | spontaneous abortion | Inverse variance weighted | 15 | -0.001 | 0.012 | 0.958 | -0.025 | 0.024 | 0.999 | 0.975 | 1.024 |
| GCST90001797 | B cell___CD27 on CD20- CD38- | spontaneous abortion | Inverse variance weighted | 20 | -0.020 | 0.015 | 0.198 | -0.050 | 0.010 | 0.980 | 0.951 | 1.010 |
| GCST90001798 | B cell___CD27 on CD24+ CD27+ | spontaneous abortion | Inverse variance weighted | 29 | -0.015 | 0.012 | 0.228 | -0.039 | 0.009 | 0.985 | 0.961 | 1.009 |
| GCST90001799 | B cell___CD27 on T cell | spontaneous abortion | Inverse variance weighted | 21 | -0.001 | 0.008 | 0.910 | -0.016 | 0.015 | 0.999 | 0.984 | 1.015 |
| GCST90001800 | B cell___CD27 on IgD+ CD24+ | spontaneous abortion | Inverse variance weighted | 31 | 0.000 | 0.009 | 0.999 | -0.018 | 0.018 | 1.000 | 0.982 | 1.018 |
| GCST90001801 | B cell___CD27 on IgD+ CD38- unsw mem | spontaneous abortion | Inverse variance weighted | 23 | 0.000 | 0.013 | 0.978 | -0.026 | 0.027 | 1.000 | 0.974 | 1.027 |
| GCST90001802 | B cell___CD27 on IgD- CD38- | spontaneous abortion | Inverse variance weighted | 30 | -0.008 | 0.012 | 0.483 | -0.031 | 0.015 | 0.992 | 0.969 | 1.015 |
| GCST90001803 | B cell___CD27 on IgD- CD38br | spontaneous abortion | Inverse variance weighted | 15 | 0.005 | 0.031 | 0.882 | -0.057 | 0.066 | 1.005 | 0.945 | 1.068 |
| GCST90001804 | B cell___CD27 on IgD- CD38dim | spontaneous abortion | Inverse variance weighted | 31 | 0.011 | 0.010 | 0.244 | -0.008 | 0.030 | 1.011 | 0.992 | 1.030 |
| GCST90001805 | B cell___CD27 on memory B cell | spontaneous abortion | Inverse variance weighted | 25 | 0.009 | 0.009 | 0.304 | -0.008 | 0.026 | 1.009 | 0.992 | 1.026 |
| GCST90001806 | B cell___CD27 on unsw mem | spontaneous abortion | Inverse variance weighted | 30 | -0.001 | 0.015 | 0.972 | -0.030 | 0.029 | 0.999 | 0.971 | 1.029 |
| GCST90001807 | B cell___CD27 on PB/PC | spontaneous abortion | Inverse variance weighted | 19 | -0.004 | 0.017 | 0.805 | -0.037 | 0.029 | 0.996 | 0.964 | 1.029 |
| GCST90001808 | B cell___CD27 on sw mem | spontaneous abortion | Inverse variance weighted | 30 | -0.008 | 0.013 | 0.553 | -0.034 | 0.018 | 0.992 | 0.966 | 1.018 |
| GCST90001809 | B cell___CD38 on CD20- | spontaneous abortion | Inverse variance weighted | 19 | -0.057 | 0.026 | 0.029 | -0.107 | -0.006 | 0.945 | 0.898 | 0.994 |
| GCST90001810 | B cell___CD38 on CD3- CD19- | spontaneous abortion | Inverse variance weighted | 18 | -0.002 | 0.014 | 0.895 | -0.029 | 0.025 | 0.998 | 0.971 | 1.026 |
| GCST90001811 | B cell___CD38 on IgD+ CD24- | spontaneous abortion | Inverse variance weighted | 17 | -0.005 | 0.018 | 0.780 | -0.040 | 0.030 | 0.995 | 0.961 | 1.031 |
| GCST90001812 | B cell___CD38 on IgD+ CD38br | spontaneous abortion | Inverse variance weighted | 17 | -0.007 | 0.017 | 0.668 | -0.042 | 0.027 | 0.993 | 0.959 | 1.027 |
| GCST90001813 | B cell___CD38 on IgD+ CD38dim | spontaneous abortion | Inverse variance weighted | 23 | 0.004 | 0.013 | 0.785 | -0.022 | 0.029 | 1.004 | 0.979 | 1.029 |
| GCST90001814 | B cell___CD38 on IgD- CD38br | spontaneous abortion | Inverse variance weighted | 14 | 0.005 | 0.005 | 0.301 | -0.005 | 0.016 | 1.005 | 0.995 | 1.016 |
| GCST90001815 | B cell___CD38 on IgD- CD38dim | spontaneous abortion | Inverse variance weighted | 20 | -0.007 | 0.009 | 0.452 | -0.023 | 0.010 | 0.994 | 0.977 | 1.010 |
| GCST90001816 | B cell___CD38 on naive-mature B cell | spontaneous abortion | Inverse variance weighted | 26 | -0.017 | 0.016 | 0.289 | -0.047 | 0.014 | 0.984 | 0.954 | 1.014 |
| GCST90001817 | B cell___CD38 on PB/PC | spontaneous abortion | Inverse variance weighted | 15 | -0.015 | 0.021 | 0.476 | -0.056 | 0.026 | 0.985 | 0.946 | 1.026 |
| GCST90001818 | B cell___CD38 on IgD+ | spontaneous abortion | Inverse variance weighted | 15 | 0.015 | 0.037 | 0.685 | -0.058 | 0.089 | 1.015 | 0.943 | 1.093 |
| GCST90001819 | B cell___CD38 on transitional | spontaneous abortion | Inverse variance weighted | 24 | 0.004 | 0.012 | 0.775 | -0.021 | 0.028 | 1.004 | 0.980 | 1.028 |
| GCST90001820 | B cell___IgD on IgD+ CD24+ | spontaneous abortion | Inverse variance weighted | 28 | 0.003 | 0.010 | 0.777 | -0.017 | 0.023 | 1.003 | 0.983 | 1.023 |
| GCST90001821 | B cell___IgD on IgD+ CD24- | spontaneous abortion | Inverse variance weighted | 29 | -0.006 | 0.012 | 0.636 | -0.029 | 0.018 | 0.994 | 0.972 | 1.018 |
| GCST90001822 | B cell___IgD on IgD+ CD38- | spontaneous abortion | Inverse variance weighted | 27 | 0.004 | 0.013 | 0.760 | -0.021 | 0.029 | 1.004 | 0.979 | 1.030 |
| GCST90001823 | B cell___IgD on IgD+ CD38- unsw mem | spontaneous abortion | Inverse variance weighted | 17 | 0.011 | 0.012 | 0.350 | -0.012 | 0.035 | 1.011 | 0.988 | 1.036 |
| GCST90001824 | B cell___IgD on IgD+ CD38br | spontaneous abortion | Inverse variance weighted | 25 | 0.006 | 0.013 | 0.662 | -0.020 | 0.032 | 1.006 | 0.980 | 1.032 |
| GCST90001825 | B cell___IgD on IgD+ CD38dim | spontaneous abortion | Inverse variance weighted | 22 | -0.002 | 0.010 | 0.848 | -0.021 | 0.017 | 0.998 | 0.979 | 1.017 |
| GCST90001826 | B cell___IgD on unsw mem | spontaneous abortion | Inverse variance weighted | 22 | 0.005 | 0.014 | 0.713 | -0.022 | 0.033 | 1.005 | 0.978 | 1.033 |
| GCST90001827 | B cell___IgD on IgD+ | spontaneous abortion | Inverse variance weighted | 21 | 0.013 | 0.013 | 0.318 | -0.013 | 0.039 | 1.013 | 0.987 | 1.040 |
| GCST90001828 | B cell___IgD on transitional | spontaneous abortion | Inverse variance weighted | 32 | 0.008 | 0.013 | 0.544 | -0.017 | 0.033 | 1.008 | 0.983 | 1.033 |
| GCST90001829 | B cell___BAFF-R on B cell | spontaneous abortion | Inverse variance weighted | 21 | 0.002 | 0.009 | 0.824 | -0.016 | 0.020 | 1.002 | 0.984 | 1.020 |
| GCST90001830 | B cell___BAFF-R on CD20- | spontaneous abortion | Inverse variance weighted | 14 | -0.006 | 0.017 | 0.700 | -0.039 | 0.026 | 0.994 | 0.962 | 1.027 |
| GCST90001831 | cDC___CD62L on CD62L+ myeloid DC | spontaneous abortion | Inverse variance weighted | 15 | 0.003 | 0.019 | 0.874 | -0.035 | 0.041 | 1.003 | 0.966 | 1.042 |
| GCST90001832 | cDC___CD62L on CD62L+ plasmacytoid DC | spontaneous abortion | Inverse variance weighted | 15 | 0.019 | 0.022 | 0.386 | -0.024 | 0.062 | 1.019 | 0.976 | 1.064 |
| GCST90001833 | cDC___CD62L on CD62L+ DC | spontaneous abortion | Inverse variance weighted | 26 | -0.005 | 0.016 | 0.732 | -0.037 | 0.026 | 0.995 | 0.964 | 1.026 |
| GCST90001834 | cDC___CD62L on monocyte | spontaneous abortion | Inverse variance weighted | 25 | 0.005 | 0.010 | 0.576 | -0.013 | 0.024 | 1.005 | 0.987 | 1.024 |
| GCST90001835 | cDC___CD62L on granulocyte | spontaneous abortion | Inverse variance weighted | 16 | 0.003 | 0.030 | 0.923 | -0.055 | 0.061 | 1.003 | 0.946 | 1.063 |
| GCST90001836 | Myeloid cell___CD66b on CD66b++ myeloid cell | spontaneous abortion | Inverse variance weighted | 26 | 0.004 | 0.010 | 0.701 | -0.016 | 0.024 | 1.004 | 0.984 | 1.024 |
| GCST90001837 | Myeloid cell___CD66b on Gr MDSC | spontaneous abortion | Inverse variance weighted | 21 | -0.011 | 0.011 | 0.339 | -0.033 | 0.011 | 0.989 | 0.968 | 1.011 |
| GCST90001838 | Maturation stages of T cell___CD3 on naive CD8br | spontaneous abortion | Inverse variance weighted | 25 | -0.002 | 0.012 | 0.898 | -0.026 | 0.023 | 0.998 | 0.975 | 1.023 |
| GCST90001839 | Maturation stages of T cell___CD3 on EM CD8br | spontaneous abortion | Inverse variance weighted | 20 | 0.001 | 0.015 | 0.969 | -0.029 | 0.030 | 1.001 | 0.971 | 1.031 |
| GCST90001840 | Maturation stages of T cell___CD3 on TD CD8br | spontaneous abortion | Inverse variance weighted | 23 | -0.008 | 0.017 | 0.643 | -0.042 | 0.026 | 0.992 | 0.959 | 1.026 |
| GCST90001841 | Maturation stages of T cell___CD3 on CM CD4+ | spontaneous abortion | Inverse variance weighted | 24 | 0.010 | 0.011 | 0.351 | -0.011 | 0.031 | 1.010 | 0.989 | 1.031 |
| GCST90001842 | Maturation stages of T cell___CD3 on Naive CD4+ | spontaneous abortion | Inverse variance weighted | 28 | -0.001 | 0.011 | 0.904 | -0.024 | 0.021 | 0.999 | 0.977 | 1.021 |
| GCST90001843 | Maturation stages of T cell___CD3 on EM CD4+ | spontaneous abortion | Inverse variance weighted | 19 | 0.027 | 0.012 | 0.024 | 0.004 | 0.050 | 1.027 | 1.004 | 1.051 |
| GCST90001844 | Maturation stages of T cell___CD3 on TD CD4+ | spontaneous abortion | Inverse variance weighted | 23 | 0.020 | 0.012 | 0.111 | -0.004 | 0.044 | 1.020 | 0.996 | 1.045 |
| GCST90001845 | Maturation stages of T cell___CD3 on CD45RA- CD4+ | spontaneous abortion | Inverse variance weighted | 27 | 0.010 | 0.012 | 0.394 | -0.014 | 0.034 | 1.010 | 0.987 | 1.035 |
| GCST90001846 | Maturation stages of T cell___CD3 on CM CD8br | spontaneous abortion | Inverse variance weighted | 18 | 0.016 | 0.018 | 0.386 | -0.020 | 0.051 | 1.016 | 0.980 | 1.053 |
| GCST90001847 | TBNK___CD3 on HLA DR+ T cell | spontaneous abortion | Inverse variance weighted | 27 | 0.012 | 0.011 | 0.270 | -0.010 | 0.034 | 1.012 | 0.991 | 1.035 |
| GCST90001848 | TBNK___CD3 on NKT | spontaneous abortion | Inverse variance weighted | 17 | -0.036 | 0.015 | 0.020 | -0.066 | -0.006 | 0.965 | 0.936 | 0.994 |
| GCST90001849 | TBNK___CD3 on HLA DR+ CD4+ | spontaneous abortion | Inverse variance weighted | 26 | 0.012 | 0.013 | 0.352 | -0.013 | 0.037 | 1.012 | 0.987 | 1.038 |
| GCST90001850 | TBNK___CD3 on HLA DR+ CD8br | spontaneous abortion | Inverse variance weighted | 26 | -0.014 | 0.013 | 0.292 | -0.039 | 0.012 | 0.987 | 0.962 | 1.012 |
| GCST90001851 | Treg___CD3 on T cell | spontaneous abortion | Inverse variance weighted | 31 | -0.005 | 0.008 | 0.524 | -0.022 | 0.011 | 0.995 | 0.978 | 1.011 |
| GCST90001852 | Treg___CD3 on CD39+ resting Treg | spontaneous abortion | Inverse variance weighted | 20 | -0.003 | 0.014 | 0.846 | -0.030 | 0.025 | 0.997 | 0.970 | 1.025 |
| GCST90001853 | Treg___CD3 on activated Treg | spontaneous abortion | Inverse variance weighted | 21 | 0.000 | 0.012 | 0.981 | -0.022 | 0.023 | 1.000 | 0.978 | 1.023 |
| GCST90001854 | Treg___CD3 on CD39+ activated Treg | spontaneous abortion | Inverse variance weighted | 26 | -0.011 | 0.012 | 0.384 | -0.035 | 0.013 | 0.989 | 0.966 | 1.014 |
| GCST90001855 | Treg___CD3 on secreting Treg | spontaneous abortion | Inverse variance weighted | 20 | 0.006 | 0.011 | 0.582 | -0.016 | 0.028 | 1.006 | 0.985 | 1.028 |
| GCST90001856 | Treg___CD3 on CD39+ secreting Treg | spontaneous abortion | Inverse variance weighted | 27 | 0.006 | 0.012 | 0.614 | -0.017 | 0.029 | 1.006 | 0.983 | 1.030 |
| GCST90001857 | Treg___CD3 on activated & secreting Treg | spontaneous abortion | Inverse variance weighted | 22 | 0.001 | 0.011 | 0.902 | -0.020 | 0.023 | 1.001 | 0.980 | 1.023 |
| GCST90001858 | Treg___CD3 on CD45RA+ CD4+ | spontaneous abortion | Inverse variance weighted | 31 | 0.015 | 0.009 | 0.091 | -0.002 | 0.033 | 1.015 | 0.998 | 1.034 |
| GCST90001859 | Treg___CD3 on CD8br | spontaneous abortion | Inverse variance weighted | 23 | 0.001 | 0.011 | 0.930 | -0.021 | 0.023 | 1.001 | 0.979 | 1.023 |
| GCST90001860 | Treg___CD3 on CD39+ CD4+ | spontaneous abortion | Inverse variance weighted | 27 | 0.002 | 0.010 | 0.810 | -0.016 | 0.021 | 1.002 | 0.984 | 1.021 |
| GCST90001861 | Treg___CD3 on CD28+ CD4+ | spontaneous abortion | Inverse variance weighted | 23 | 0.013 | 0.014 | 0.371 | -0.015 | 0.040 | 1.013 | 0.985 | 1.041 |
| GCST90001862 | Treg___CD3 on CD28+ DN (CD4-CD8-) | spontaneous abortion | Inverse variance weighted | 16 | 0.024 | 0.013 | 0.052 | 0.000 | 0.049 | 1.025 | 1.000 | 1.050 |
| GCST90001863 | Treg___CD3 on CD28+ CD45RA- CD8br | spontaneous abortion | Inverse variance weighted | 18 | 0.005 | 0.015 | 0.765 | -0.026 | 0.035 | 1.005 | 0.975 | 1.036 |
| GCST90001864 | Treg___CD3 on CD28+ CD45RA+ CD8br | spontaneous abortion | Inverse variance weighted | 24 | 0.022 | 0.013 | 0.098 | -0.004 | 0.048 | 1.022 | 0.996 | 1.049 |
| GCST90001865 | Treg___CD3 on CD28- CD8br | spontaneous abortion | Inverse variance weighted | 20 | 0.017 | 0.019 | 0.364 | -0.020 | 0.053 | 1.017 | 0.981 | 1.055 |
| GCST90001866 | Treg___CD3 on CD39+ CD8br | spontaneous abortion | Inverse variance weighted | 16 | 0.008 | 0.018 | 0.667 | -0.027 | 0.042 | 1.008 | 0.973 | 1.043 |
| GCST90001867 | Treg___CD3 on CD4+ | spontaneous abortion | Inverse variance weighted | 28 | -0.006 | 0.012 | 0.633 | -0.030 | 0.018 | 0.994 | 0.970 | 1.018 |
| GCST90001868 | Treg___CD3 on CD4 Treg | spontaneous abortion | Inverse variance weighted | 11 | 0.016 | 0.017 | 0.338 | -0.017 | 0.048 | 1.016 | 0.984 | 1.050 |
| GCST90001869 | Treg___CD3 on resting Treg | spontaneous abortion | Inverse variance weighted | 36 | 0.021 | 0.012 | 0.077 | -0.002 | 0.044 | 1.021 | 0.998 | 1.045 |
| GCST90001870 | Myeloid cell___CD34 on HSC | spontaneous abortion | Inverse variance weighted | 12 | 0.001 | 0.008 | 0.909 | -0.016 | 0.018 | 1.001 | 0.984 | 1.018 |
| GCST90001871 | Maturation stages of T cell___HVEM on T cell | spontaneous abortion | Inverse variance weighted | 25 | -0.016 | 0.012 | 0.185 | -0.039 | 0.008 | 0.984 | 0.962 | 1.008 |
| GCST90001872 | Maturation stages of T cell___HVEM on naive CD8br | spontaneous abortion | Inverse variance weighted | 21 | 0.000 | 0.006 | 0.989 | -0.012 | 0.013 | 1.000 | 0.988 | 1.013 |
| GCST90001873 | Maturation stages of T cell___HVEM on EM CD8br | spontaneous abortion | Inverse variance weighted | 18 | 0.018 | 0.011 | 0.114 | -0.004 | 0.039 | 1.018 | 0.996 | 1.040 |
| GCST90001874 | Maturation stages of T cell___HVEM on TD CD8br | spontaneous abortion | Inverse variance weighted | 25 | 0.015 | 0.012 | 0.203 | -0.008 | 0.039 | 1.015 | 0.992 | 1.040 |
| GCST90001875 | Maturation stages of T cell___HVEM on CD4+ | spontaneous abortion | Inverse variance weighted | 20 | -0.004 | 0.013 | 0.755 | -0.029 | 0.021 | 0.996 | 0.972 | 1.021 |
| GCST90001876 | Maturation stages of T cell___HVEM on CM CD4+ | spontaneous abortion | Inverse variance weighted | 18 | 0.002 | 0.006 | 0.807 | -0.011 | 0.014 | 1.002 | 0.989 | 1.014 |
| GCST90001877 | Maturation stages of T cell___HVEM on naive CD4+ | spontaneous abortion | Inverse variance weighted | 18 | 0.007 | 0.008 | 0.370 | -0.008 | 0.022 | 1.007 | 0.992 | 1.023 |
| GCST90001878 | Maturation stages of T cell___HVEM on EM CD4+ | spontaneous abortion | Inverse variance weighted | 22 | -0.001 | 0.009 | 0.899 | -0.019 | 0.017 | 0.999 | 0.981 | 1.017 |
| GCST90001879 | Maturation stages of T cell___HVEM on TD CD4+ | spontaneous abortion | Inverse variance weighted | 26 | 0.004 | 0.010 | 0.701 | -0.016 | 0.023 | 1.004 | 0.985 | 1.023 |
| GCST90001880 | Maturation stages of T cell___HVEM on CD45RA- CD4+ | spontaneous abortion | Inverse variance weighted | 19 | 0.003 | 0.008 | 0.745 | -0.014 | 0.019 | 1.003 | 0.987 | 1.019 |
| GCST90001881 | Maturation stages of T cell___HVEM on CD8br | spontaneous abortion | Inverse variance weighted | 16 | 0.004 | 0.015 | 0.778 | -0.025 | 0.033 | 1.004 | 0.975 | 1.034 |
| GCST90001882 | Maturation stages of T cell___HVEM on CM CD8br | spontaneous abortion | Inverse variance weighted | 18 | 0.001 | 0.009 | 0.881 | -0.016 | 0.018 | 1.001 | 0.984 | 1.018 |
| GCST90001883 | TBNK___CD16-CD56 on NKT | spontaneous abortion | Inverse variance weighted | 28 | -0.018 | 0.012 | 0.145 | -0.041 | 0.006 | 0.983 | 0.960 | 1.006 |
| GCST90001884 | TBNK___CD16-CD56 on NK | spontaneous abortion | Inverse variance weighted | 28 | 0.007 | 0.014 | 0.633 | -0.021 | 0.034 | 1.007 | 0.979 | 1.035 |
| GCST90001885 | TBNK___CD16-CD56 on HLA DR+ NK | spontaneous abortion | Inverse variance weighted | 24 | 0.002 | 0.008 | 0.841 | -0.014 | 0.018 | 1.002 | 0.986 | 1.018 |
| GCST90001886 | Treg___CD28 on CD39+ activated Treg | spontaneous abortion | Inverse variance weighted | 19 | 0.011 | 0.010 | 0.283 | -0.009 | 0.032 | 1.011 | 0.991 | 1.032 |
| GCST90001887 | Treg___CD28 on secreting Treg | spontaneous abortion | Inverse variance weighted | 17 | -0.002 | 0.009 | 0.787 | -0.020 | 0.015 | 0.998 | 0.980 | 1.015 |
| GCST90001888 | Treg___CD28 on CD39+ secreting Treg | spontaneous abortion | Inverse variance weighted | 21 | 0.003 | 0.013 | 0.807 | -0.021 | 0.028 | 1.003 | 0.979 | 1.028 |
| GCST90001889 | Treg___CD28 on activated & secreting Treg | spontaneous abortion | Inverse variance weighted | 24 | 0.012 | 0.009 | 0.203 | -0.006 | 0.030 | 1.012 | 0.994 | 1.031 |
| GCST90001890 | Treg___CD28 on CD45RA+ CD4+ | spontaneous abortion | Inverse variance weighted | 13 | 0.016 | 0.018 | 0.379 | -0.020 | 0.052 | 1.016 | 0.981 | 1.053 |
| GCST90001891 | Treg___CD28 on CD45RA- CD4 not Treg | spontaneous abortion | Inverse variance weighted | 13 | -0.016 | 0.017 | 0.363 | -0.049 | 0.018 | 0.984 | 0.952 | 1.018 |
| GCST90001892 | Treg___CD28 on CD39+ CD4+ | spontaneous abortion | Inverse variance weighted | 17 | 0.018 | 0.012 | 0.122 | -0.005 | 0.041 | 1.018 | 0.995 | 1.042 |
| GCST90001893 | Treg___CD28 on CD28+ CD45RA- CD8br | spontaneous abortion | Inverse variance weighted | 17 | 0.026 | 0.022 | 0.237 | -0.017 | 0.068 | 1.026 | 0.983 | 1.070 |
| GCST90001894 | Treg___CD28 on CD28+ CD4+ | spontaneous abortion | Inverse variance weighted | 26 | -0.001 | 0.010 | 0.912 | -0.021 | 0.019 | 0.999 | 0.979 | 1.019 |
| GCST90001895 | Treg___CD28 on CD28+ DN (CD4-CD8-) | spontaneous abortion | Inverse variance weighted | 3 | 0.005 | 0.065 | 0.936 | -0.123 | 0.133 | 1.005 | 0.885 | 1.142 |
| GCST90001896 | Treg___CD28 on CD28+ CD45RA+ CD8br | spontaneous abortion | Inverse variance weighted | 15 | 0.012 | 0.013 | 0.350 | -0.013 | 0.038 | 1.012 | 0.987 | 1.038 |
| GCST90001897 | Treg___CD28 on CD39+ CD8br | spontaneous abortion | Inverse variance weighted | 20 | -0.011 | 0.009 | 0.198 | -0.028 | 0.006 | 0.989 | 0.973 | 1.006 |
| GCST90001898 | Treg___CD28 on CD4+ | spontaneous abortion | Inverse variance weighted | 26 | -0.015 | 0.011 | 0.180 | -0.036 | 0.007 | 0.986 | 0.965 | 1.007 |
| GCST90001899 | Treg___CD28 on CD4 Treg | spontaneous abortion | Inverse variance weighted | 24 | 0.010 | 0.008 | 0.205 | -0.005 | 0.025 | 1.010 | 0.995 | 1.026 |
| GCST90001900 | Treg___CD28 on resting Treg | spontaneous abortion | Inverse variance weighted | 6 | 0.011 | 0.025 | 0.658 | -0.038 | 0.059 | 1.011 | 0.963 | 1.061 |
| GCST90001901 | Treg___CD28 on CD39+ resting Treg | spontaneous abortion | Inverse variance weighted | 22 | -0.006 | 0.009 | 0.497 | -0.023 | 0.011 | 0.994 | 0.977 | 1.011 |
| GCST90001902 | Treg___CD28 on activated Treg | spontaneous abortion | Inverse variance weighted | 18 | 0.026 | 0.013 | 0.037 | 0.002 | 0.051 | 1.027 | 1.002 | 1.053 |
| GCST90001903 | cDC___CD86 on myeloid DC | spontaneous abortion | Inverse variance weighted | 22 | -0.002 | 0.016 | 0.886 | -0.034 | 0.029 | 0.998 | 0.967 | 1.030 |
| GCST90001904 | cDC___CD86 on CD62L+ myeloid DC | spontaneous abortion | Inverse variance weighted | 22 | 0.017 | 0.013 | 0.190 | -0.008 | 0.042 | 1.017 | 0.992 | 1.043 |
| GCST90001905 | cDC___CD86 on monocyte | spontaneous abortion | Inverse variance weighted | 16 | 0.016 | 0.014 | 0.236 | -0.010 | 0.043 | 1.016 | 0.990 | 1.044 |
| GCST90001906 | cDC___CD86 on granulocyte | spontaneous abortion | Inverse variance weighted | 21 | 0.029 | 0.016 | 0.071 | -0.003 | 0.061 | 1.030 | 0.997 | 1.063 |
| GCST90001907 | Maturation stages of T cell___CCR7 on naive CD4+ | spontaneous abortion | Inverse variance weighted | 24 | -0.002 | 0.009 | 0.819 | -0.020 | 0.016 | 0.998 | 0.980 | 1.016 |
| GCST90001908 | Maturation stages of T cell___CCR7 on naive CD8br | spontaneous abortion | Inverse variance weighted | 24 | -0.005 | 0.015 | 0.754 | -0.033 | 0.024 | 0.995 | 0.967 | 1.024 |
| GCST90001909 | TBNK___CD45 on CD14+ monocyte | spontaneous abortion | Inverse variance weighted | 17 | -0.008 | 0.014 | 0.581 | -0.034 | 0.019 | 0.993 | 0.966 | 1.019 |
| GCST90001910 | TBNK___CD45 on B cell | spontaneous abortion | Inverse variance weighted | 15 | -0.009 | 0.009 | 0.283 | -0.027 | 0.008 | 0.991 | 0.974 | 1.008 |
| GCST90001911 | TBNK___CD45 on NK | spontaneous abortion | Inverse variance weighted | 29 | 0.019 | 0.012 | 0.132 | -0.006 | 0.043 | 1.019 | 0.994 | 1.044 |
| GCST90001912 | TBNK___CD45 on HLA DR+ NK | spontaneous abortion | Inverse variance weighted | 12 | 0.014 | 0.022 | 0.545 | -0.030 | 0.058 | 1.014 | 0.970 | 1.059 |
| GCST90001913 | TBNK___CD45 on granulocyte | spontaneous abortion | Inverse variance weighted | 15 | -0.020 | 0.013 | 0.129 | -0.046 | 0.006 | 0.980 | 0.955 | 1.006 |
| GCST90001914 | TBNK___CD45 on lymphocyte | spontaneous abortion | Inverse variance weighted | 24 | 0.003 | 0.014 | 0.836 | -0.025 | 0.031 | 1.003 | 0.976 | 1.031 |
| GCST90001915 | TBNK___CD45 on T cell | spontaneous abortion | Inverse variance weighted | 15 | -0.011 | 0.014 | 0.414 | -0.038 | 0.016 | 0.989 | 0.962 | 1.016 |
| GCST90001916 | TBNK___CD45 on CD4+ | spontaneous abortion | Inverse variance weighted | 13 | -0.037 | 0.024 | 0.128 | -0.084 | 0.011 | 0.964 | 0.920 | 1.011 |
| GCST90001917 | TBNK___CD45 on CD8br | spontaneous abortion | Inverse variance weighted | 26 | 0.005 | 0.004 | 0.194 | -0.002 | 0.012 | 1.005 | 0.998 | 1.012 |
| GCST90001918 | TBNK___CD45 on HLA DR+ T cell | spontaneous abortion | Inverse variance weighted | 18 | 0.008 | 0.012 | 0.520 | -0.015 | 0.031 | 1.008 | 0.985 | 1.031 |
| GCST90001919 | TBNK___CD45 on NKT | spontaneous abortion | Inverse variance weighted | 22 | 0.004 | 0.011 | 0.716 | -0.018 | 0.026 | 1.004 | 0.982 | 1.027 |
| GCST90001920 | TBNK___CD45 on HLA DR+ CD4+ | spontaneous abortion | Inverse variance weighted | 17 | 0.004 | 0.013 | 0.745 | -0.020 | 0.029 | 1.004 | 0.980 | 1.029 |
| GCST90001921 | TBNK___CD45 on HLA DR+ CD8br | spontaneous abortion | Inverse variance weighted | 18 | 0.007 | 0.011 | 0.530 | -0.015 | 0.029 | 1.007 | 0.985 | 1.030 |
| GCST90001922 | Treg___CD127 on T cell | spontaneous abortion | Inverse variance weighted | 18 | 0.014 | 0.019 | 0.482 | -0.024 | 0.052 | 1.014 | 0.976 | 1.053 |
| GCST90001923 | Treg___CD127 on CD45RA- CD4 not Treg | spontaneous abortion | Inverse variance weighted | 16 | -0.002 | 0.012 | 0.881 | -0.026 | 0.022 | 0.998 | 0.975 | 1.022 |
| GCST90001924 | Treg___CD127 on CD28+ CD4+ | spontaneous abortion | Inverse variance weighted | 20 | -0.018 | 0.012 | 0.123 | -0.042 | 0.005 | 0.982 | 0.959 | 1.005 |
| GCST90001925 | Treg___CD127 on CD28+ DN (CD4-CD8-) | spontaneous abortion | Inverse variance weighted | 24 | -0.007 | 0.015 | 0.633 | -0.036 | 0.022 | 0.993 | 0.964 | 1.022 |
| GCST90001926 | Treg___CD127 on granulocyte | spontaneous abortion | Inverse variance weighted | 31 | 0.017 | 0.013 | 0.163 | -0.007 | 0.042 | 1.018 | 0.993 | 1.043 |
| GCST90001927 | Treg___CD127 on CD8br | spontaneous abortion | Inverse variance weighted | 24 | -0.043 | 0.016 | 0.007 | -0.075 | -0.012 | 0.958 | 0.928 | 0.989 |
| GCST90001928 | Treg___CD127 on CD28+ CD45RA- CD8br | spontaneous abortion | Inverse variance weighted | 19 | 0.003 | 0.013 | 0.839 | -0.022 | 0.027 | 1.003 | 0.978 | 1.028 |
| GCST90001929 | Treg___CD127 on CD28+ CD45RA+ CD8br | spontaneous abortion | Inverse variance weighted | 21 | 0.009 | 0.016 | 0.560 | -0.022 | 0.041 | 1.009 | 0.978 | 1.042 |
| GCST90001930 | Treg___CD127 on CD28- CD8br | spontaneous abortion | Inverse variance weighted | 20 | 0.007 | 0.016 | 0.643 | -0.024 | 0.039 | 1.007 | 0.976 | 1.040 |
| GCST90001931 | Treg___CD127 on CD4+ | spontaneous abortion | Inverse variance weighted | 8 | -0.011 | 0.026 | 0.680 | -0.062 | 0.040 | 0.989 | 0.940 | 1.041 |
| GCST90001932 | Treg___CD127 on CD45RA+ CD4+ | spontaneous abortion | Inverse variance weighted | 22 | 0.006 | 0.014 | 0.670 | -0.021 | 0.033 | 1.006 | 0.979 | 1.034 |
| GCST90001933 | Treg___CD25 on CD45RA- CD4 not Treg | spontaneous abortion | Inverse variance weighted | 26 | 0.007 | 0.010 | 0.456 | -0.012 | 0.027 | 1.007 | 0.988 | 1.027 |
| GCST90001934 | Treg___CD25 on CD45RA+ CD4 not Treg | spontaneous abortion | Inverse variance weighted | 22 | -0.002 | 0.009 | 0.846 | -0.019 | 0.016 | 0.998 | 0.981 | 1.016 |
| GCST90001935 | Treg___CD25 on CD39+ CD4 Treg | spontaneous abortion | Inverse variance weighted | 17 | -0.020 | 0.020 | 0.319 | -0.060 | 0.019 | 0.980 | 0.942 | 1.020 |
| GCST90001936 | Treg___CD25 on CD4 Treg | spontaneous abortion | Inverse variance weighted | 22 | 0.006 | 0.008 | 0.425 | -0.009 | 0.021 | 1.006 | 0.991 | 1.022 |
| GCST90001937 | Treg___CD25 on resting Treg | spontaneous abortion | Inverse variance weighted | 20 | -0.008 | 0.016 | 0.618 | -0.040 | 0.023 | 0.992 | 0.961 | 1.024 |
| GCST90001938 | Treg___CD25 on CD39+ resting Treg | spontaneous abortion | Inverse variance weighted | 15 | 0.017 | 0.022 | 0.433 | -0.026 | 0.061 | 1.018 | 0.974 | 1.063 |
| GCST90001939 | Treg___CD25 on activated Treg | spontaneous abortion | Inverse variance weighted | 17 | -0.020 | 0.023 | 0.374 | -0.064 | 0.024 | 0.980 | 0.938 | 1.025 |
| GCST90001940 | Treg___CD25 on CD39+ activated Treg | spontaneous abortion | Inverse variance weighted | 12 | -0.011 | 0.019 | 0.546 | -0.048 | 0.025 | 0.989 | 0.953 | 1.026 |
| GCST90001941 | Treg___CD25 on secreting Treg | spontaneous abortion | Inverse variance weighted | 14 | -0.004 | 0.008 | 0.592 | -0.020 | 0.011 | 0.996 | 0.980 | 1.012 |
| GCST90001942 | Treg___CD25 on CD39+ secreting Treg | spontaneous abortion | Inverse variance weighted | 16 | -0.006 | 0.011 | 0.546 | -0.028 | 0.015 | 0.994 | 0.973 | 1.015 |
| GCST90001943 | Treg___CD25 on activated & secreting Treg | spontaneous abortion | Inverse variance weighted | 21 | 0.001 | 0.008 | 0.870 | -0.014 | 0.017 | 1.001 | 0.986 | 1.017 |
| GCST90001944 | cDC___CD123 on plasmacytoid DC | spontaneous abortion | Inverse variance weighted | 18 | -0.002 | 0.006 | 0.769 | -0.015 | 0.011 | 0.998 | 0.986 | 1.011 |
| GCST90001945 | cDC___CD123 on CD62L+ plasmacytoid DC | spontaneous abortion | Inverse variance weighted | 18 | -0.002 | 0.006 | 0.770 | -0.015 | 0.011 | 0.998 | 0.986 | 1.011 |
| GCST90001946 | Myeloid cell___CD33 on CD14+ monocyte | spontaneous abortion | Inverse variance weighted | 21 | 0.003 | 0.008 | 0.660 | -0.011 | 0.018 | 1.003 | 0.989 | 1.018 |
| GCST90001947 | Myeloid cell___CD33 on CD33br HLA DR+ CD14dim | spontaneous abortion | Inverse variance weighted | 27 | -0.004 | 0.007 | 0.563 | -0.019 | 0.010 | 0.996 | 0.981 | 1.010 |
| GCST90001948 | Myeloid cell___CD33 on CD33dim HLA DR+ CD11b+ | spontaneous abortion | Inverse variance weighted | 22 | -0.001 | 0.009 | 0.946 | -0.018 | 0.017 | 0.999 | 0.982 | 1.017 |
| GCST90001949 | Myeloid cell___CD33 on CD33dim HLA DR+ CD11b- | spontaneous abortion | Inverse variance weighted | 22 | -0.002 | 0.010 | 0.811 | -0.021 | 0.017 | 0.998 | 0.979 | 1.017 |
| GCST90001950 | Myeloid cell___CD33 on Gr MDSC | spontaneous abortion | Inverse variance weighted | 20 | 0.000 | 0.010 | 0.962 | -0.019 | 0.020 | 1.000 | 0.981 | 1.020 |
| GCST90001951 | Myeloid cell___CD33 on CD66b++ myeloid cell | spontaneous abortion | Inverse variance weighted | 18 | 0.008 | 0.010 | 0.431 | -0.012 | 0.027 | 1.008 | 0.989 | 1.027 |
| GCST90001952 | Myeloid cell___CD33 on Mo MDSC | spontaneous abortion | Inverse variance weighted | 21 | 0.002 | 0.008 | 0.795 | -0.013 | 0.017 | 1.002 | 0.987 | 1.018 |
| GCST90001953 | Myeloid cell___CD33 on CD33dim HLA DR- | spontaneous abortion | Inverse variance weighted | 19 | -0.005 | 0.008 | 0.545 | -0.021 | 0.011 | 0.995 | 0.980 | 1.011 |
| GCST90001954 | Myeloid cell___CD33 on basophil | spontaneous abortion | Inverse variance weighted | 22 | -0.001 | 0.006 | 0.924 | -0.012 | 0.011 | 0.999 | 0.988 | 1.011 |
| GCST90001955 | Myeloid cell___CD33 on Im MDSC | spontaneous abortion | Inverse variance weighted | 22 | 0.000 | 0.009 | 0.966 | -0.017 | 0.018 | 1.000 | 0.983 | 1.018 |
| GCST90001956 | Myeloid cell___CD33 on CD33br HLA DR+ | spontaneous abortion | Inverse variance weighted | 23 | -0.008 | 0.008 | 0.299 | -0.024 | 0.007 | 0.992 | 0.976 | 1.007 |
| GCST90001957 | Myeloid cell___CD33 on CD33br HLA DR+ CD14- | spontaneous abortion | Inverse variance weighted | 21 | -0.011 | 0.008 | 0.197 | -0.027 | 0.006 | 0.989 | 0.973 | 1.006 |
| GCST90001958 | TBNK___CD4 on monocyte | spontaneous abortion | Inverse variance weighted | 15 | 0.026 | 0.016 | 0.106 | -0.006 | 0.057 | 1.026 | 0.994 | 1.059 |
| GCST90001959 | TBNK___CD4 on HLA DR+ CD4+ | spontaneous abortion | Inverse variance weighted | 21 | 0.021 | 0.017 | 0.232 | -0.013 | 0.054 | 1.021 | 0.987 | 1.056 |
| GCST90001960 | Treg___CD25 on CD4+ | spontaneous abortion | Inverse variance weighted | 16 | 0.017 | 0.008 | 0.035 | 0.001 | 0.032 | 1.017 | 1.001 | 1.033 |
| GCST90001961 | Treg___CD25 on CD39+ CD4+ | spontaneous abortion | Inverse variance weighted | 23 | -0.006 | 0.012 | 0.630 | -0.028 | 0.017 | 0.994 | 0.972 | 1.017 |
| GCST90001962 | Treg___CD25 on CD28+ CD4+ | spontaneous abortion | Inverse variance weighted | 5 | 0.050 | 0.036 | 0.163 | -0.020 | 0.121 | 1.052 | 0.980 | 1.129 |
| GCST90001963 | cDC___FSC-A on myeloid DC | spontaneous abortion | Inverse variance weighted | 20 | -0.007 | 0.008 | 0.371 | -0.023 | 0.009 | 0.993 | 0.977 | 1.009 |
| GCST90001964 | cDC___FSC-A on plasmacytoid DC | spontaneous abortion | Inverse variance weighted | 26 | 0.001 | 0.007 | 0.857 | -0.013 | 0.015 | 1.001 | 0.987 | 1.015 |
| GCST90001965 | cDC___FSC-A on monocyte | spontaneous abortion | Inverse variance weighted | 19 | -0.011 | 0.014 | 0.406 | -0.038 | 0.015 | 0.989 | 0.963 | 1.015 |
| GCST90001966 | cDC___FSC-A on granulocyte | spontaneous abortion | Inverse variance weighted | 21 | 0.019 | 0.013 | 0.136 | -0.006 | 0.043 | 1.019 | 0.994 | 1.044 |
| GCST90001967 | TBNK___FSC-A on CD14+ monocyte | spontaneous abortion | Inverse variance weighted | 23 | 0.005 | 0.014 | 0.702 | -0.022 | 0.032 | 1.005 | 0.978 | 1.033 |
| GCST90001968 | TBNK___FSC-A on B cell | spontaneous abortion | Inverse variance weighted | 20 | 0.007 | 0.017 | 0.673 | -0.026 | 0.040 | 1.007 | 0.975 | 1.040 |
| GCST90001969 | TBNK___FSC-A on NK | spontaneous abortion | Inverse variance weighted | 18 | -0.027 | 0.014 | 0.055 | -0.055 | 0.001 | 0.973 | 0.946 | 1.001 |
| GCST90001970 | TBNK___FSC-A on HLA DR+ NK | spontaneous abortion | Inverse variance weighted | 20 | 0.002 | 0.010 | 0.805 | -0.017 | 0.022 | 1.002 | 0.983 | 1.022 |
| GCST90001971 | TBNK___FSC-A on lymphocyte | spontaneous abortion | Inverse variance weighted | 17 | -0.010 | 0.014 | 0.495 | -0.037 | 0.018 | 0.990 | 0.963 | 1.018 |
| GCST90001972 | TBNK___FSC-A on T cell | spontaneous abortion | Inverse variance weighted | 22 | -0.012 | 0.010 | 0.222 | -0.032 | 0.007 | 0.988 | 0.969 | 1.007 |
| GCST90001973 | TBNK___FSC-A on CD4+ | spontaneous abortion | Inverse variance weighted | 25 | 0.001 | 0.009 | 0.883 | -0.016 | 0.019 | 1.001 | 0.984 | 1.019 |
| GCST90001974 | TBNK___FSC-A on CD8br | spontaneous abortion | Inverse variance weighted | 18 | -0.005 | 0.019 | 0.799 | -0.042 | 0.032 | 0.995 | 0.959 | 1.033 |
| GCST90001975 | TBNK___FSC-A on HLA DR+ T cell | spontaneous abortion | Inverse variance weighted | 18 | -0.007 | 0.008 | 0.385 | -0.023 | 0.009 | 0.993 | 0.978 | 1.009 |
| GCST90001976 | TBNK___FSC-A on NKT | spontaneous abortion | Inverse variance weighted | 20 | 0.003 | 0.019 | 0.859 | -0.034 | 0.041 | 1.003 | 0.966 | 1.042 |
| GCST90001977 | TBNK___FSC-A on HLA DR+ CD4+ | spontaneous abortion | Inverse variance weighted | 17 | 0.014 | 0.013 | 0.277 | -0.012 | 0.041 | 1.015 | 0.988 | 1.041 |
| GCST90001978 | TBNK___FSC-A on HLA DR+ CD8br | spontaneous abortion | Inverse variance weighted | 18 | 0.008 | 0.010 | 0.440 | -0.012 | 0.027 | 1.008 | 0.988 | 1.027 |
| GCST90001979 | Monocyte___CD16 on CD14- CD16+ monocyte | spontaneous abortion | Inverse variance weighted | 20 | -0.013 | 0.012 | 0.299 | -0.036 | 0.011 | 0.988 | 0.964 | 1.011 |
| GCST90001980 | Monocyte___CD40 on CD14+ CD16- monocyte | spontaneous abortion | Inverse variance weighted | 23 | 0.000 | 0.011 | 0.972 | -0.021 | 0.022 | 1.000 | 0.979 | 1.022 |
| GCST90001981 | Monocyte___CD40 on CD14+ CD16+ monocyte | spontaneous abortion | Inverse variance weighted | 21 | 0.007 | 0.008 | 0.386 | -0.009 | 0.024 | 1.007 | 0.991 | 1.024 |
| GCST90001982 | Monocyte___CCR2 on CD14- CD16+ monocyte | spontaneous abortion | Inverse variance weighted | 28 | 0.012 | 0.008 | 0.148 | -0.004 | 0.028 | 1.012 | 0.996 | 1.028 |
| GCST90001983 | Monocyte___CD14 on CD14+ CD16+ monocyte | spontaneous abortion | Inverse variance weighted | 14 | -0.028 | 0.024 | 0.241 | -0.074 | 0.019 | 0.973 | 0.929 | 1.019 |
| GCST90001984 | Monocyte___HLA DR on CD14- CD16+ monocyte | spontaneous abortion | Inverse variance weighted | 19 | 0.013 | 0.012 | 0.278 | -0.011 | 0.038 | 1.013 | 0.989 | 1.038 |
| GCST90001985 | Monocyte___CD40 on monocytes | spontaneous abortion | Inverse variance weighted | 29 | -0.007 | 0.006 | 0.232 | -0.019 | 0.005 | 0.993 | 0.981 | 1.005 |
| GCST90001986 | Monocyte___CD14 on CD14+ CD16- monocyte | spontaneous abortion | Inverse variance weighted | 16 | -0.021 | 0.020 | 0.292 | -0.060 | 0.018 | 0.979 | 0.941 | 1.018 |
| GCST90001987 | Monocyte___CD64 on CD14+ CD16- monocyte | spontaneous abortion | Inverse variance weighted | 34 | 0.000 | 0.005 | 0.966 | -0.010 | 0.009 | 1.000 | 0.990 | 1.009 |
| GCST90001988 | Monocyte___HLA DR on CD14+ CD16- monocyte | spontaneous abortion | Inverse variance weighted | 22 | -0.007 | 0.012 | 0.568 | -0.029 | 0.016 | 0.993 | 0.971 | 1.016 |
| GCST90001989 | Monocyte___CD40 on CD14- CD16+ monocyte | spontaneous abortion | Inverse variance weighted | 27 | 0.001 | 0.009 | 0.925 | -0.016 | 0.018 | 1.001 | 0.984 | 1.018 |
| GCST90001990 | Monocyte___CD64 on CD14- CD16+ monocyte | spontaneous abortion | Inverse variance weighted | 20 | 0.019 | 0.017 | 0.264 | -0.015 | 0.053 | 1.020 | 0.985 | 1.055 |
| GCST90001991 | Monocyte___HLA DR on CD14+ monocyte | spontaneous abortion | Inverse variance weighted | 21 | -0.010 | 0.012 | 0.415 | -0.033 | 0.014 | 0.990 | 0.968 | 1.014 |
| GCST90001992 | Monocyte___ CCR2 on CD14+ CD16+ monocyte | spontaneous abortion | Inverse variance weighted | 37 | -0.025 | 0.009 | 0.004 | -0.042 | -0.008 | 0.976 | 0.959 | 0.992 |
| GCST90001993 | Monocyte___PDL-1 on CD14+ CD16- monocyte | spontaneous abortion | Inverse variance weighted | 15 | -0.029 | 0.026 | 0.264 | -0.079 | 0.022 | 0.972 | 0.924 | 1.022 |
| GCST90001994 | Monocyte___CX3CR1 on CD14- CD16- | spontaneous abortion | Inverse variance weighted | 19 | 0.000 | 0.008 | 0.955 | -0.015 | 0.016 | 1.000 | 0.985 | 1.016 |
| GCST90001995 | Monocyte___CX3CR1 on monocyte | spontaneous abortion | Inverse variance weighted | 26 | 0.005 | 0.014 | 0.732 | -0.023 | 0.032 | 1.005 | 0.977 | 1.033 |
| GCST90001996 | Monocyte___CX3CR1 on CD14+ CD16+ monocyte | spontaneous abortion | Inverse variance weighted | 34 | -0.003 | 0.009 | 0.705 | -0.021 | 0.014 | 0.997 | 0.979 | 1.014 |
| GCST90001997 | Monocyte___CX3CR1 on CD14+ CD16- monocyte | spontaneous abortion | Inverse variance weighted | 27 | -0.012 | 0.013 | 0.357 | -0.037 | 0.013 | 0.988 | 0.964 | 1.013 |
| GCST90001998 | Monocyte___PDL-1 on CD14+ CD16+ monocyte | spontaneous abortion | Inverse variance weighted | 28 | -0.009 | 0.012 | 0.462 | -0.033 | 0.015 | 0.991 | 0.967 | 1.015 |
| GCST90001999 | Monocyte___PDL-1 on CD14- CD16+ monocyte | spontaneous abortion | Inverse variance weighted | 18 | -0.015 | 0.014 | 0.279 | -0.042 | 0.012 | 0.985 | 0.959 | 1.012 |
| GCST90002000 | Monocyte___PDL-1 on CD14- CD16- | spontaneous abortion | Inverse variance weighted | 28 | -0.006 | 0.012 | 0.640 | -0.029 | 0.018 | 0.994 | 0.971 | 1.018 |
| GCST90002001 | Monocyte___CD64 on CD14- CD16- | spontaneous abortion | Inverse variance weighted | 16 | 0.028 | 0.019 | 0.149 | -0.010 | 0.066 | 1.028 | 0.990 | 1.068 |
| GCST90002002 | Monocyte___PDL-1 on monocyte | spontaneous abortion | Inverse variance weighted | 15 | -0.007 | 0.020 | 0.733 | -0.045 | 0.032 | 0.993 | 0.956 | 1.032 |
| GCST90002003 | Monocyte___CCR2 on CD14- CD16- | spontaneous abortion | Inverse variance weighted | 17 | 0.021 | 0.015 | 0.155 | -0.008 | 0.051 | 1.022 | 0.992 | 1.052 |
| GCST90002004 | Monocyte___CCR2 on CD14+ CD16- monocyte | spontaneous abortion | Inverse variance weighted | 27 | 0.004 | 0.007 | 0.523 | -0.009 | 0.017 | 1.004 | 0.991 | 1.018 |
| GCST90002005 | Monocyte___CD16 on CD14+ CD16+ monocyte | spontaneous abortion | Inverse variance weighted | 22 | -0.016 | 0.016 | 0.298 | -0.047 | 0.015 | 0.984 | 0.954 | 1.015 |
| GCST90002006 | Monocyte___CD64 on monocyte | spontaneous abortion | Inverse variance weighted | 28 | -0.006 | 0.010 | 0.512 | -0.026 | 0.013 | 0.994 | 0.975 | 1.013 |
| GCST90002007 | Monocyte___HLA DR on CD14+ CD16+ monocyte | spontaneous abortion | Inverse variance weighted | 19 | -0.002 | 0.006 | 0.803 | -0.014 | 0.011 | 0.998 | 0.986 | 1.011 |
| GCST90002008 | Monocyte___CCR2 on monocyte | spontaneous abortion | Inverse variance weighted | 24 | 0.004 | 0.008 | 0.613 | -0.012 | 0.020 | 1.004 | 0.989 | 1.020 |
| GCST90002009 | Monocyte___HLA DR on CD14- CD16- | spontaneous abortion | Inverse variance weighted | 24 | -0.013 | 0.010 | 0.190 | -0.033 | 0.007 | 0.987 | 0.967 | 1.007 |
| GCST90002010 | Monocyte___HLA DR on monocyte | spontaneous abortion | Inverse variance weighted | 17 | 0.006 | 0.010 | 0.515 | -0.013 | 0.026 | 1.006 | 0.987 | 1.026 |
| GCST90002011 | Monocyte___CD64 on CD14+ CD16+ monocyte | spontaneous abortion | Inverse variance weighted | 12 | -0.007 | 0.029 | 0.820 | -0.064 | 0.051 | 0.993 | 0.938 | 1.052 |
| GCST90002012 | Monocyte___CX3CR1 on CD14- CD16+ monocyte | spontaneous abortion | Inverse variance weighted | 18 | -0.018 | 0.016 | 0.266 | -0.050 | 0.014 | 0.982 | 0.951 | 1.014 |
| GCST90002013 | cDC___CCR2 on myeloid DC | spontaneous abortion | Inverse variance weighted | 14 | 0.012 | 0.011 | 0.263 | -0.009 | 0.033 | 1.012 | 0.991 | 1.034 |
| GCST90002014 | cDC___CCR2 on CD62L+ myeloid DC | spontaneous abortion | Inverse variance weighted | 14 | 0.000 | 0.017 | 0.995 | -0.034 | 0.034 | 1.000 | 0.967 | 1.034 |
| GCST90002015 | cDC___CCR2 on plasmacytoid DC | spontaneous abortion | Inverse variance weighted | 19 | 0.011 | 0.013 | 0.378 | -0.014 | 0.036 | 1.011 | 0.986 | 1.037 |
| GCST90002016 | cDC___CCR2 on CD62L+ plasmacytoid DC | spontaneous abortion | Inverse variance weighted | 19 | 0.011 | 0.013 | 0.371 | -0.014 | 0.036 | 1.011 | 0.987 | 1.037 |
| GCST90002017 | cDC___CCR2 on monocyte | spontaneous abortion | Inverse variance weighted | 25 | -0.002 | 0.014 | 0.910 | -0.029 | 0.026 | 0.998 | 0.971 | 1.026 |
| GCST90002018 | cDC___CCR2 on granulocyte | spontaneous abortion | Inverse variance weighted | 16 | -0.022 | 0.017 | 0.187 | -0.056 | 0.011 | 0.978 | 0.946 | 1.011 |
| GCST90002019 | Myeloid cell___CD14 on Mo MDSC | spontaneous abortion | Inverse variance weighted | 24 | -0.002 | 0.009 | 0.807 | -0.019 | 0.015 | 0.998 | 0.981 | 1.015 |
| GCST90002020 | Myeloid cell___CD14 on CD33br HLA DR+ CD14dim | spontaneous abortion | Inverse variance weighted | 18 | 0.009 | 0.016 | 0.574 | -0.023 | 0.041 | 1.009 | 0.977 | 1.042 |
| GCST90002021 | Myeloid cell___CD14 on CD33dim HLA DR+ CD11b+ | spontaneous abortion | Inverse variance weighted | 19 | -0.002 | 0.014 | 0.896 | -0.028 | 0.025 | 0.998 | 0.972 | 1.025 |
| GCST90002022 | Maturation stages of T cell___CD4 on CD4+ | spontaneous abortion | Inverse variance weighted | 22 | -0.008 | 0.014 | 0.572 | -0.035 | 0.020 | 0.992 | 0.965 | 1.020 |
| GCST90002023 | Maturation stages of T cell___CD4 on CM CD4 + | spontaneous abortion | Inverse variance weighted | 15 | -0.026 | 0.016 | 0.105 | -0.059 | 0.006 | 0.974 | 0.943 | 1.006 |
| GCST90002024 | Maturation stages of T cell___CD4 on naive CD4+ | spontaneous abortion | Inverse variance weighted | 20 | -0.005 | 0.015 | 0.723 | -0.035 | 0.025 | 0.995 | 0.965 | 1.025 |
| GCST90002025 | Maturation stages of T cell___CD4 on EM CD4+ | spontaneous abortion | Inverse variance weighted | 19 | -0.008 | 0.013 | 0.522 | -0.034 | 0.017 | 0.992 | 0.967 | 1.017 |
| GCST90002026 | Maturation stages of T cell___CD4 on TD CD4+ | spontaneous abortion | Inverse variance weighted | 24 | -0.003 | 0.014 | 0.814 | -0.031 | 0.024 | 0.997 | 0.970 | 1.025 |
| GCST90002027 | Maturation stages of T cell___CD4 on CD45RA+ CD4+ | spontaneous abortion | Inverse variance weighted | 27 | -0.023 | 0.014 | 0.089 | -0.050 | 0.004 | 0.977 | 0.952 | 1.004 |
| GCST90002028 | TBNK___CD19 on B cell | spontaneous abortion | Inverse variance weighted | 24 | -0.009 | 0.016 | 0.569 | -0.041 | 0.022 | 0.991 | 0.960 | 1.023 |
| GCST90002029 | Treg___CD39 on CD39+ CD8br | spontaneous abortion | Inverse variance weighted | 23 | 0.016 | 0.015 | 0.281 | -0.013 | 0.046 | 1.016 | 0.987 | 1.047 |
| GCST90002030 | Treg___CD39 on CD39+ activated Treg | spontaneous abortion | Inverse variance weighted | 22 | -0.015 | 0.014 | 0.295 | -0.043 | 0.013 | 0.985 | 0.958 | 1.013 |
| GCST90002031 | Treg___CD39 on CD39+ secreting Treg | spontaneous abortion | Inverse variance weighted | 23 | 0.009 | 0.008 | 0.248 | -0.007 | 0.026 | 1.010 | 0.993 | 1.026 |
| GCST90002032 | Treg___CD39 on CD39+ CD4+ | spontaneous abortion | Inverse variance weighted | 20 | 0.010 | 0.009 | 0.262 | -0.007 | 0.027 | 1.010 | 0.993 | 1.028 |
| GCST90002033 | Treg___CD39 on granulocyte | spontaneous abortion | Inverse variance weighted | 26 | 0.002 | 0.013 | 0.898 | -0.024 | 0.027 | 1.002 | 0.976 | 1.028 |
| GCST90002034 | Treg___CD39 on monocyte | spontaneous abortion | Inverse variance weighted | 22 | 0.002 | 0.008 | 0.796 | -0.013 | 0.017 | 1.002 | 0.987 | 1.017 |
| GCST90002035 | cDC___CD80 on myeloid DC | spontaneous abortion | Inverse variance weighted | 26 | -0.001 | 0.012 | 0.953 | -0.023 | 0.022 | 0.999 | 0.977 | 1.022 |
| GCST90002036 | cDC___CD80 on CD62L+ myeloid DC | spontaneous abortion | Inverse variance weighted | 26 | -0.003 | 0.008 | 0.758 | -0.019 | 0.014 | 0.997 | 0.981 | 1.014 |
| GCST90002037 | cDC___CD80 on plasmacytoid DC | spontaneous abortion | Inverse variance weighted | 21 | -0.011 | 0.010 | 0.282 | -0.031 | 0.009 | 0.989 | 0.969 | 1.009 |
| GCST90002038 | cDC___CD80 on CD62L+ plasmacytoid DC | spontaneous abortion | Inverse variance weighted | 21 | -0.002 | 0.010 | 0.804 | -0.021 | 0.017 | 0.998 | 0.979 | 1.017 |
| GCST90002039 | cDC___CD80 on monocyte | spontaneous abortion | Inverse variance weighted | 23 | 0.024 | 0.013 | 0.070 | -0.002 | 0.051 | 1.025 | 0.998 | 1.052 |
| GCST90002040 | cDC___CD80 on granulocyte | spontaneous abortion | Inverse variance weighted | 31 | -0.033 | 0.011 | 0.003 | -0.055 | -0.011 | 0.967 | 0.946 | 0.989 |
| GCST90002041 | Myeloid cell___CD45 on lymphocyte | spontaneous abortion | Inverse variance weighted | 17 | 0.030 | 0.017 | 0.079 | -0.003 | 0.063 | 1.030 | 0.997 | 1.065 |
| GCST90002042 | Myeloid cell___CD45 on CD33br HLA DR+ CD14- | spontaneous abortion | Inverse variance weighted | 18 | -0.001 | 0.015 | 0.954 | -0.030 | 0.029 | 0.999 | 0.970 | 1.029 |
| GCST90002043 | Myeloid cell___CD45 on CD33br HLA DR+ CD14dim | spontaneous abortion | Inverse variance weighted | 15 | -0.013 | 0.014 | 0.357 | -0.040 | 0.015 | 0.987 | 0.960 | 1.015 |
| GCST90002044 | Myeloid cell___CD45 on CD33dim HLA DR+ CD11b- | spontaneous abortion | Inverse variance weighted | 10 | 0.000 | 0.034 | 0.990 | -0.067 | 0.066 | 1.000 | 0.935 | 1.068 |
| GCST90002045 | Myeloid cell___CD45 on CD33- HLA DR- | spontaneous abortion | Inverse variance weighted | 14 | 0.004 | 0.017 | 0.819 | -0.029 | 0.037 | 1.004 | 0.972 | 1.037 |
| GCST90002046 | Myeloid cell___CD45 on CD33- HLA DR+ | spontaneous abortion | Inverse variance weighted | 24 | -0.004 | 0.005 | 0.438 | -0.014 | 0.006 | 0.996 | 0.986 | 1.006 |
| GCST90002047 | Myeloid cell___CD45 on Gr MDSC | spontaneous abortion | Inverse variance weighted | 18 | -0.033 | 0.014 | 0.021 | -0.061 | -0.005 | 0.967 | 0.940 | 0.995 |
| GCST90002048 | Myeloid cell___CD45 on CD66b++ myelod cell | spontaneous abortion | Inverse variance weighted | 16 | -0.002 | 0.015 | 0.899 | -0.031 | 0.027 | 0.998 | 0.970 | 1.027 |
| GCST90002049 | Myeloid cell___CD45 on Mo MDSC | spontaneous abortion | Inverse variance weighted | 17 | -0.012 | 0.013 | 0.338 | -0.037 | 0.013 | 0.988 | 0.964 | 1.013 |
| GCST90002050 | Myeloid cell___CD45 on CD33dim HLA DR- | spontaneous abortion | Inverse variance weighted | 18 | -0.001 | 0.017 | 0.957 | -0.035 | 0.033 | 0.999 | 0.966 | 1.034 |
| GCST90002051 | Myeloid cell___CD45 on basophil | spontaneous abortion | Inverse variance weighted | 17 | 0.021 | 0.019 | 0.264 | -0.016 | 0.058 | 1.021 | 0.984 | 1.060 |
| GCST90002052 | Myeloid cell___CD45 on Im MDSC | spontaneous abortion | Inverse variance weighted | 10 | 0.000 | 0.010 | 0.960 | -0.019 | 0.020 | 1.000 | 0.981 | 1.020 |
| GCST90002053 | Myeloid cell___CD45 on CD33br HLA DR+ | spontaneous abortion | Inverse variance weighted | 16 | -0.009 | 0.009 | 0.310 | -0.027 | 0.009 | 0.991 | 0.973 | 1.009 |
| GCST90002054 | Maturation stages of T cell___CD8 on CM CD8br | spontaneous abortion | Inverse variance weighted | 14 | 0.002 | 0.023 | 0.943 | -0.043 | 0.046 | 1.002 | 0.958 | 1.047 |
| GCST90002055 | Maturation stages of T cell___CD8 on naive CD8br | spontaneous abortion | Inverse variance weighted | 16 | -0.009 | 0.022 | 0.682 | -0.051 | 0.034 | 0.991 | 0.950 | 1.034 |
| GCST90002056 | Maturation stages of T cell___CD8 on EM CD8br | spontaneous abortion | Inverse variance weighted | 24 | 0.002 | 0.014 | 0.901 | -0.026 | 0.029 | 1.002 | 0.975 | 1.029 |
| GCST90002057 | Maturation stages of T cell___CD8 on TD CD8br | spontaneous abortion | Inverse variance weighted | 17 | -0.019 | 0.016 | 0.252 | -0.051 | 0.013 | 0.981 | 0.951 | 1.013 |
| GCST90002058 | TBNK___CD8 on CD8br | spontaneous abortion | Inverse variance weighted | 26 | 0.013 | 0.011 | 0.237 | -0.009 | 0.035 | 1.013 | 0.991 | 1.036 |
| GCST90002059 | TBNK___CD8 on NKT | spontaneous abortion | Inverse variance weighted | 18 | -0.010 | 0.015 | 0.525 | -0.040 | 0.020 | 0.990 | 0.961 | 1.021 |
| GCST90002060 | TBNK___CD8 on HLA DR+ CD8br | spontaneous abortion | Inverse variance weighted | 25 | 0.020 | 0.009 | 0.034 | 0.002 | 0.038 | 1.020 | 1.002 | 1.038 |
| GCST90002061 | Treg___CD4 on CD39+ CD4+ | spontaneous abortion | Inverse variance weighted | 27 | 0.017 | 0.013 | 0.177 | -0.008 | 0.043 | 1.018 | 0.992 | 1.044 |
| GCST90002062 | Treg___CD4 on CD28+ CD4+ | spontaneous abortion | Inverse variance weighted | 21 | -0.029 | 0.016 | 0.068 | -0.061 | 0.002 | 0.971 | 0.941 | 1.002 |
| GCST90002063 | Treg___CD4 on CD4 Treg | spontaneous abortion | Inverse variance weighted | 29 | 0.002 | 0.011 | 0.854 | -0.019 | 0.023 | 1.002 | 0.981 | 1.023 |
| GCST90002064 | Treg___CD4 on resting Treg | spontaneous abortion | Inverse variance weighted | 13 | -0.030 | 0.021 | 0.153 | -0.070 | 0.011 | 0.971 | 0.932 | 1.011 |
| GCST90002065 | Treg___CD4 on CD39+ resting Treg | spontaneous abortion | Inverse variance weighted | 14 | -0.007 | 0.017 | 0.688 | -0.039 | 0.026 | 0.993 | 0.962 | 1.026 |
| GCST90002066 | Treg___CD4 on activated Treg | spontaneous abortion | Inverse variance weighted | 24 | 0.009 | 0.009 | 0.321 | -0.009 | 0.027 | 1.009 | 0.991 | 1.027 |
| GCST90002067 | Treg___CD4 on CD39+ activated Treg | spontaneous abortion | Inverse variance weighted | 23 | 0.018 | 0.015 | 0.208 | -0.010 | 0.047 | 1.018 | 0.990 | 1.048 |
| GCST90002068 | Treg___CD4 on secreting Treg | spontaneous abortion | Inverse variance weighted | 28 | -0.005 | 0.012 | 0.639 | -0.028 | 0.017 | 0.995 | 0.972 | 1.017 |
| GCST90002069 | Treg___CD4 on CD39+ secreting Treg | spontaneous abortion | Inverse variance weighted | 22 | 0.009 | 0.008 | 0.267 | -0.007 | 0.025 | 1.009 | 0.993 | 1.026 |
| GCST90002070 | Treg___CD4 on activated & secreting Treg | spontaneous abortion | Inverse variance weighted | 32 | 0.009 | 0.008 | 0.306 | -0.008 | 0.025 | 1.009 | 0.992 | 1.026 |
| GCST90002071 | cDC___SSC-A on myeloid DC | spontaneous abortion | Inverse variance weighted | 18 | 0.003 | 0.006 | 0.560 | -0.008 | 0.015 | 1.003 | 0.992 | 1.015 |
| GCST90002072 | cDC___SSC-A on plasmacytoid DC | spontaneous abortion | Inverse variance weighted | 26 | -0.001 | 0.013 | 0.950 | -0.025 | 0.024 | 0.999 | 0.975 | 1.024 |
| GCST90002073 | cDC___SSC-A on monocyte | spontaneous abortion | Inverse variance weighted | 22 | 0.007 | 0.014 | 0.616 | -0.020 | 0.034 | 1.007 | 0.980 | 1.034 |
| GCST90002074 | TBNK___SSC-A on CD14+ monocyte | spontaneous abortion | Inverse variance weighted | 22 | 0.011 | 0.016 | 0.469 | -0.019 | 0.042 | 1.011 | 0.981 | 1.043 |
| GCST90002075 | TBNK___SSC-A on B cell | spontaneous abortion | Inverse variance weighted | 13 | 0.014 | 0.023 | 0.548 | -0.032 | 0.060 | 1.014 | 0.969 | 1.062 |
| GCST90002076 | TBNK___SSC-A on NK | spontaneous abortion | Inverse variance weighted | 23 | 0.000 | 0.013 | 0.988 | -0.027 | 0.026 | 1.000 | 0.974 | 1.027 |
| GCST90002077 | TBNK___SSC-A on HLA DR+ NK | spontaneous abortion | Inverse variance weighted | 28 | -0.002 | 0.010 | 0.833 | -0.021 | 0.017 | 0.998 | 0.979 | 1.017 |
| GCST90002078 | TBNK___SSC-A on granulocyte | spontaneous abortion | Inverse variance weighted | 25 | 0.005 | 0.012 | 0.674 | -0.018 | 0.028 | 1.005 | 0.982 | 1.028 |
| GCST90002079 | TBNK___SSC-A on lymphocyte | spontaneous abortion | Inverse variance weighted | 21 | -0.025 | 0.019 | 0.191 | -0.063 | 0.013 | 0.975 | 0.939 | 1.013 |
| GCST90002080 | TBNK___SSC-A on T cell | spontaneous abortion | Inverse variance weighted | 22 | 0.003 | 0.015 | 0.823 | -0.026 | 0.032 | 1.003 | 0.975 | 1.033 |
| GCST90002081 | TBNK___SSC-A on CD4+ | spontaneous abortion | Inverse variance weighted | 30 | 0.025 | 0.014 | 0.078 | -0.003 | 0.053 | 1.026 | 0.997 | 1.055 |
| GCST90002082 | TBNK___SSC-A on CD8br | spontaneous abortion | Inverse variance weighted | 18 | 0.003 | 0.010 | 0.729 | -0.016 | 0.023 | 1.003 | 0.984 | 1.023 |
| GCST90002083 | TBNK___SSC-A on HLA DR+ T cell | spontaneous abortion | Inverse variance weighted | 20 | -0.006 | 0.018 | 0.722 | -0.041 | 0.028 | 0.994 | 0.960 | 1.029 |
| GCST90002084 | TBNK___SSC-A on NKT | spontaneous abortion | Inverse variance weighted | 20 | 0.001 | 0.008 | 0.880 | -0.014 | 0.016 | 1.001 | 0.986 | 1.017 |
| GCST90002085 | TBNK___SSC-A on HLA DR+ CD4+ | spontaneous abortion | Inverse variance weighted | 22 | -0.001 | 0.016 | 0.966 | -0.032 | 0.031 | 0.999 | 0.968 | 1.032 |
| GCST90002086 | TBNK___SSC-A on HLA DR+ CD8br | spontaneous abortion | Inverse variance weighted | 24 | -0.006 | 0.014 | 0.646 | -0.033 | 0.021 | 0.994 | 0.967 | 1.021 |
| GCST90002087 | cDC___CD11c on myeloid DC | spontaneous abortion | Inverse variance weighted | 30 | 0.001 | 0.010 | 0.913 | -0.018 | 0.021 | 1.001 | 0.982 | 1.021 |
| GCST90002088 | cDC___CD11c on CD62L+ myeloid DC | spontaneous abortion | Inverse variance weighted | 26 | 0.007 | 0.011 | 0.523 | -0.014 | 0.028 | 1.007 | 0.986 | 1.028 |
| GCST90002089 | cDC___CD11c on monocyte | spontaneous abortion | Inverse variance weighted | 19 | 0.011 | 0.012 | 0.350 | -0.012 | 0.035 | 1.011 | 0.988 | 1.035 |
| GCST90002090 | cDC___CD11c on granulocyte | spontaneous abortion | Inverse variance weighted | 22 | 0.013 | 0.015 | 0.371 | -0.015 | 0.041 | 1.013 | 0.985 | 1.042 |
| GCST90002091 | Myeloid cell___CD11b on CD14+ monocyte | spontaneous abortion | Inverse variance weighted | 20 | 0.005 | 0.009 | 0.617 | -0.013 | 0.022 | 1.005 | 0.987 | 1.023 |
| GCST90002092 | Myeloid cell___CD11b on Gr MDSC | spontaneous abortion | Inverse variance weighted | 3 | 0.005 | 0.016 | 0.756 | -0.026 | 0.036 | 1.005 | 0.974 | 1.036 |
| GCST90002093 | Myeloid cell___CD11b on CD66b++ myeloid cell | spontaneous abortion | Inverse variance weighted | 17 | 0.001 | 0.014 | 0.932 | -0.027 | 0.030 | 1.001 | 0.973 | 1.030 |
| GCST90002094 | Myeloid cell___CD11b on Mo MDSC | spontaneous abortion | Inverse variance weighted | 16 | 0.013 | 0.010 | 0.195 | -0.007 | 0.032 | 1.013 | 0.993 | 1.033 |
| GCST90002095 | Myeloid cell___CD11b on CD33dim HLA DR- | spontaneous abortion | Inverse variance weighted | 23 | 0.007 | 0.011 | 0.557 | -0.015 | 0.029 | 1.007 | 0.985 | 1.029 |
| GCST90002096 | Myeloid cell___CD11b on basophil | spontaneous abortion | Inverse variance weighted | 19 | -0.008 | 0.014 | 0.557 | -0.036 | 0.019 | 0.992 | 0.965 | 1.020 |
| GCST90002097 | Myeloid cell___CD11b on CD33br HLA DR+ CD14dim | spontaneous abortion | Inverse variance weighted | 20 | 0.004 | 0.014 | 0.801 | -0.024 | 0.031 | 1.004 | 0.977 | 1.031 |
| GCST90002098 | Maturation stages of T cell___CD45RA on naive CD4+ | spontaneous abortion | Inverse variance weighted | 33 | 0.011 | 0.008 | 0.192 | -0.006 | 0.028 | 1.011 | 0.994 | 1.028 |
| GCST90002099 | Maturation stages of T cell___CD4RA on TD CD4+ | spontaneous abortion | Inverse variance weighted | 33 | 0.006 | 0.007 | 0.396 | -0.008 | 0.020 | 1.006 | 0.992 | 1.020 |
| GCST90002100 | Maturation stages of T cell___CD45RA on naive CD8br | spontaneous abortion | Inverse variance weighted | 22 | 0.001 | 0.014 | 0.958 | -0.028 | 0.029 | 1.001 | 0.973 | 1.030 |
| GCST90002101 | Maturation stages of T cell___CD45RA on TD CD8br | spontaneous abortion | Inverse variance weighted | 14 | 0.021 | 0.022 | 0.334 | -0.022 | 0.065 | 1.022 | 0.978 | 1.067 |
| GCST90002102 | Treg___CD45RA on resting Treg | spontaneous abortion | Inverse variance weighted | 29 | 0.006 | 0.006 | 0.366 | -0.007 | 0.018 | 1.006 | 0.993 | 1.019 |
| GCST90002103 | Treg___CD45RA on CD39+ resting Treg | spontaneous abortion | Inverse variance weighted | 8 | -0.011 | 0.017 | 0.523 | -0.045 | 0.023 | 0.989 | 0.956 | 1.023 |
| GCST90002104 | cDC___HLA DR on myeloid DC | spontaneous abortion | Inverse variance weighted | 15 | -0.009 | 0.009 | 0.329 | -0.026 | 0.009 | 0.991 | 0.974 | 1.009 |
| GCST90002105 | cDC___HLA DR on plasmacytoid DC | spontaneous abortion | Inverse variance weighted | 23 | 0.006 | 0.008 | 0.480 | -0.010 | 0.022 | 1.006 | 0.990 | 1.022 |
| GCST90002106 | cDC___HLA DR on DC | spontaneous abortion | Inverse variance weighted | 19 | 0.004 | 0.010 | 0.652 | -0.015 | 0.024 | 1.004 | 0.985 | 1.024 |
| GCST90002107 | Myeloid cell___HLA DR on HSC | spontaneous abortion | Inverse variance weighted | 6 | -0.017 | 0.021 | 0.406 | -0.058 | 0.024 | 0.983 | 0.943 | 1.024 |
| GCST90002108 | Myeloid cell___HLA DR on CD33br HLA DR+ CD14- | spontaneous abortion | Inverse variance weighted | 25 | 0.000 | 0.007 | 0.992 | -0.014 | 0.014 | 1.000 | 0.987 | 1.014 |
| GCST90002109 | Myeloid cell___HLA DR on CD33br HLA DR+ CD14dim | spontaneous abortion | Inverse variance weighted | 20 | 0.009 | 0.013 | 0.460 | -0.015 | 0.034 | 1.009 | 0.985 | 1.034 |
| GCST90002110 | Myeloid cell___HLA DR on CD33dim HLA DR+ CD11b+ | spontaneous abortion | Inverse variance weighted | 23 | 0.007 | 0.008 | 0.355 | -0.008 | 0.022 | 1.007 | 0.992 | 1.022 |
| GCST90002111 | Myeloid cell___HLA DR on CD33dim HLA DR+ CD11b- | spontaneous abortion | Inverse variance weighted | 18 | 0.016 | 0.011 | 0.134 | -0.005 | 0.037 | 1.016 | 0.995 | 1.037 |
| GCST90002112 | Myeloid cell___HLA DR on CD33- HLA DR+ | spontaneous abortion | Inverse variance weighted | 12 | 0.004 | 0.010 | 0.736 | -0.017 | 0.024 | 1.004 | 0.983 | 1.024 |
| GCST90002113 | TBNK___HLA DR on HLA DR+ T cell | spontaneous abortion | Inverse variance weighted | 19 | 0.018 | 0.012 | 0.126 | -0.005 | 0.040 | 1.018 | 0.995 | 1.041 |
| GCST90002114 | TBNK___HLA DR on HLA DR+ CD4+ | spontaneous abortion | Inverse variance weighted | 21 | -0.001 | 0.018 | 0.949 | -0.037 | 0.034 | 0.999 | 0.964 | 1.035 |
| GCST90002115 | TBNK___HLA DR on HLA DR+ CD8br | spontaneous abortion | Inverse variance weighted | 20 | 0.026 | 0.018 | 0.149 | -0.009 | 0.062 | 1.027 | 0.991 | 1.064 |
| GCST90002116 | TBNK___HLA DR on B cell | spontaneous abortion | Inverse variance weighted | 22 | 0.013 | 0.010 | 0.195 | -0.007 | 0.033 | 1.013 | 0.993 | 1.033 |
| GCST90002117 | TBNK___HLA DR on HLA DR+ NK | spontaneous abortion | Inverse variance weighted | 27 | 0.000 | 0.014 | 0.976 | -0.028 | 0.027 | 1.000 | 0.973 | 1.027 |
| GCST90002118 | Treg___CD8 on CD28+ CD45RA- CD8br | spontaneous abortion | Inverse variance weighted | 14 | 0.007 | 0.022 | 0.740 | -0.035 | 0.050 | 1.007 | 0.965 | 1.051 |
| GCST90002119 | Treg___CD8 on CD28+ CD45RA+ CD8br | spontaneous abortion | Inverse variance weighted | 22 | 0.005 | 0.012 | 0.643 | -0.018 | 0.029 | 1.005 | 0.983 | 1.029 |
| GCST90002120 | Treg___CD8 on CD28- CD8br | spontaneous abortion | Inverse variance weighted | 20 | 0.017 | 0.020 | 0.409 | -0.023 | 0.056 | 1.017 | 0.977 | 1.058 |
| GCST90002121 | Treg___CD8 on CD39+ CD8br | spontaneous abortion | Inverse variance weighted | 25 | 0.008 | 0.015 | 0.595 | -0.022 | 0.038 | 1.008 | 0.979 | 1.039 |

Table S4. MR estimates, heterogeneity and horizontal pleiotropy tests of the 25 immune cells on spontaneous abortion (SA).

| Exposure_id | Exposure | Outcome | Method | nSNP | P.value | or | or_lci95 | or_uci95 | Q | Q_pval | egger_intercept | Pleiotropy_pval | MR_PRESSO  Global Test pval |
| --- | --- | --- | --- | --- | --- | --- | --- | --- | --- | --- | --- | --- | --- |
| GCST90001394 | IgD+ CD38dim B cell | SA | MR Egger | 25 | 0.103 | 1.013 | 0.998 | 1.028 | 20.319 | 0.623 |  |  |  |
| GCST90001394 | IgD+ CD38dim B cell | SA | Weighted median | 25 | 0.150 | 1.014 | 0.995 | 1.034 |  |  |  |  |  |
| GCST90001394 | IgD+ CD38dim B cell | SA | Inverse variance weighted | 25 | 0.046 | 1.013 | 1.000 | 1.026 | 20.320 | 0.678 | <0.001 | 0.974 | 0.685 |
| GCST90001394 | IgD+ CD38dim B cell | SA | Simple mode | 25 | 0.238 | 1.025 | 0.985 | 1.067 |  |  |  |  |  |
| GCST90001394 | IgD+ CD38dim B cell | SA | Weighted mode | 25 | 0.094 | 1.012 | 0.998 | 1.027 |  |  |  |  |  |
| GCST90001439 | IgD+CD24+ B cell (%lymphocyte) | SA | MR Egger | 15 | 0.652 | 1.027 | 0.917 | 1.150 | 14.429 | 0.344 |  |  |  |
| GCST90001439 | IgD+CD24+ B cell (%lymphocyte) | SA | Weighted median | 15 | 0.524 | 1.022 | 0.956 | 1.093 |  |  |  |  |  |
| GCST90001439 | IgD+CD24+ B cell (%lymphocyte) | SA | Inverse variance weighted | 15 | 0.023 | 1.058 | 1.008 | 1.110 | 14.787 | 0.393 | 0.006 | 0.580 | 0.422 |
| GCST90001439 | IgD+CD24+ B cell (%lymphocyte) | SA | Simple mode | 15 | 0.800 | 1.012 | 0.922 | 1.112 |  |  |  |  |  |
| GCST90001439 | IgD+CD24+ B cell (%lymphocyte) | SA | Weighted mode | 15 | 0.527 | 1.025 | 0.951 | 1.106 |  |  |  |  |  |
| GCST90001539 | Central MemoryCD4+ T cell | SA | MR Egger | 24 | 0.164 | 1.034 | 0.988 | 1.083 | 16.481 | 0.791 |  |  |  |
| GCST90001539 | Central MemoryCD4+ T cell | SA | Weighted median | 24 | 0.115 | 1.039 | 0.991 | 1.090 |  |  |  |  |  |
| GCST90001539 | Central MemoryCD4+ T cell | SA | Inverse variance weighted | 24 | 0.008 | 1.039 | 1.010 | 1.069 | 16.542 | 0.831 | 0.001 | 0.807 | 0.859 |
| GCST90001539 | Central MemoryCD4+ T cell | SA | Simple mode | 24 | 0.542 | 1.022 | 0.953 | 1.097 |  |  |  |  |  |
| GCST90001539 | Central MemoryCD4+ T cell | SA | Weighted mode | 24 | 0.130 | 1.036 | 0.991 | 1.084 |  |  |  |  |  |
| GCST90001573 | Terminally Differentiated CD4-CD8- T cell | SA | MR Egger | 24 | 0.099 | 1.035 | 0.995 | 1.075 | 24.620 | 0.427 |  |  |  |
| GCST90001573 | Terminally Differentiated CD4-CD8- T cell | SA | Weighted median | 24 | 0.710 | 1.008 | 0.967 | 1.050 |  |  |  |  |  |
| GCST90001573 | Terminally Differentiated CD4-CD8- T cell | SA | Inverse variance weighted | 24 | 0.029 | 1.028 | 1.003 | 1.054 | 24.789 | 0.474 | -0.002 | 0.718 | 0.412 |
| GCST90001573 | Terminally Differentiated CD4-CD8- T cell | SA | Simple mode | 24 | 0.589 | 1.020 | 0.950 | 1.095 |  |  |  |  |  |
| GCST90001573 | Terminally Differentiated CD4-CD8- T cell | SA | Weighted mode | 24 | 0.782 | 1.007 | 0.960 | 1.055 |  |  |  |  |  |
| GCST90001590 | CD4+ T cell | SA | MR Egger | 22 | 0.066 | 0.970 | 0.940 | 1.000 | 18.556 | 0.551 |  |  |  |
| GCST90001590 | CD4+ T cell | SA | Weighted median | 22 | 0.074 | 0.969 | 0.936 | 1.003 |  |  |  |  |  |
| GCST90001590 | CD4+ T cell | SA | Inverse variance weighted | 22 | 0.028 | 0.973 | 0.950 | 0.997 | 18.704 | 0.604 | 0.002 | 0.705 | 0.675 |
| GCST90001590 | CD4+ T cell | SA | Simple mode | 22 | 0.143 | 0.955 | 0.901 | 1.013 |  |  |  |  |  |
| GCST90001590 | CD4+ T cell | SA | Weighted mode | 22 | 0.060 | 0.969 | 0.939 | 1.000 |  |  |  |  |  |
| GCST90001652 | Granulocyte TBNK | SA | MR Egger | 25 | 0.557 | 1.012 | 0.974 | 1.051 | 19.898 | 0.648 |  |  |  |
| GCST90001652 | Granulocyte TBNK | SA | Weighted median | 25 | 0.444 | 1.015 | 0.977 | 1.053 |  |  |  |  |  |
| GCST90001652 | Granulocyte TBNK | SA | Inverse variance weighted | 25 | 0.017 | 1.032 | 1.006 | 1.059 | 21.842 | 0.589 | 0.007 | 0.177 | 0.625 |
| GCST90001652 | Granulocyte TBNK | SA | Simple mode | 25 | 0.165 | 1.041 | 0.985 | 1.100 |  |  |  |  |  |
| GCST90001652 | Granulocyte TBNK | SA | Weighted mode | 25 | 0.394 | 1.014 | 0.982 | 1.048 |  |  |  |  |  |
| GCST90001662 | CD28- CD8dim T cell | SA | MR Egger | 15 | 0.011 | 1.016 | 1.005 | 1.027 | 11.526 | 0.567 |  |  |  |
| GCST90001662 | CD28- CD8dim T cell | SA | Weighted median | 15 | 0.047 | 1.014 | 1.000 | 1.029 |  |  |  |  |  |
| GCST90001662 | CD28- CD8dim T cell | SA | Inverse variance weighted | 15 | 0.010 | 1.013 | 1.003 | 1.023 | 13.818 | 0.463 | -0.008 | 0.154 | 0.604 |
| GCST90001662 | CD28- CD8dim T cell | SA | Simple mode | 15 | 0.353 | 1.020 | 0.979 | 1.063 |  |  |  |  |  |
| GCST90001662 | CD28- CD8dim T cell | SA | Weighted mode | 15 | 0.043 | 1.014 | 1.002 | 1.026 |  |  |  |  |  |
| GCST90001673 | CD28−CD127−CD25++CD8+ T cell | SA | MR Egger | 18 | 0.082 | 1.039 | 0.998 | 1.082 | 22.976 | 0.114 |  |  |  |
| GCST90001673 | CD28−CD127−CD25++CD8+ T cell | SA | Weighted median | 18 | 0.085 | 1.033 | 0.996 | 1.071 |  |  |  |  |  |
| GCST90001673 | CD28−CD127−CD25++CD8+ T cell | SA | Inverse variance weighted | 18 | 0.025 | 1.035 | 1.004 | 1.067 | 23.080 | 0.147 | -0.002 | 0.792 | 0.316 |
| GCST90001673 | CD28−CD127−CD25++CD8+ T cell | SA | Simple mode | 18 | 0.266 | 1.051 | 0.966 | 1.143 |  |  |  |  |  |
| GCST90001673 | CD28−CD127−CD25++CD8+ T cell | SA | Weighted mode | 18 | 0.050 | 1.035 | 1.002 | 1.068 |  |  |  |  |  |
| GCST90001679 | CD25++CD8+ T cell | SA | MR Egger | 17 | 0.068 | 1.070 | 1.000 | 1.144 | 19.565 | 0.189 |  |  |  |
| GCST90001679 | CD25++CD8+ T cell | SA | Weighted median | 17 | 0.127 | 1.041 | 0.989 | 1.096 |  |  |  |  |  |
| GCST90001679 | CD25++CD8+ T cell | SA | Inverse variance weighted | 17 | 0.016 | 1.050 | 1.009 | 1.093 | 20.159 | 0.213 | -0.006 | 0.510 | 0.266 |
| GCST90001679 | CD25++CD8+ T cell | SA | Simple mode | 17 | 0.360 | 1.037 | 0.962 | 1.117 |  |  |  |  |  |
| GCST90001679 | CD25++CD8+ T cell | SA | Weighted mode | 17 | 0.146 | 1.040 | 0.989 | 1.094 |  |  |  |  |  |
| GCST90001688 | CD28+ CD45RA+ CD8+ Tcell (%T cell) | SA | MR Egger | 88 | 0.069 | 0.997 | 0.993 | 1.000 | 65.610 | 0.950 |  |  |  |
| GCST90001688 | CD28+ CD45RA+ CD8+ Tcell (%T cell) | SA | Weighted median | 88 | 0.334 | 0.998 | 0.994 | 1.002 |  |  |  |  |  |
| GCST90001688 | CD28+ CD45RA+ CD8+ Tcell (%T cell) | SA | Inverse variance weighted | 88 | 0.013 | 0.996 | 0.994 | 0.999 | 65.632 | 0.958 | -0.001 | 0.880 | 0.963 |
| GCST90001688 | CD28+ CD45RA+ CD8+ Tcell (%T cell) | SA | Simple mode | 88 | 0.344 | 0.997 | 0.991 | 1.003 |  |  |  |  |  |
| GCST90001688 | CD28+ CD45RA+ CD8+ Tcell (%T cell) | SA | Weighted mode | 88 | 0.360 | 0.998 | 0.993 | 1.003 |  |  |  |  |  |
| GCST90001690 | CD28+ CD45RA+ CD8+ T cell (AC) | SA | MR Egger | 54 | 0.022 | 0.994 | 0.989 | 0.999 | 39.482 | 0.899 |  |  |  |
| GCST90001690 | CD28+ CD45RA+ CD8+ T cell (AC) | SA | Weighted median | 54 | 0.300 | 0.997 | 0.990 | 1.003 |  |  |  |  |  |
| GCST90001690 | CD28+ CD45RA+ CD8+ T cell (AC) | SA | Inverse variance weighted | 54 | 0.031 | 0.995 | 0.991 | 1.000 | 40.418 | 0.898 | 0.003 | 0.338 | 0.895 |
| GCST90001690 | CD28+ CD45RA+ CD8+ T cell (AC) | SA | Simple mode | 54 | 0.237 | 0.995 | 0.988 | 1.003 |  |  |  |  |  |
| GCST90001690 | CD28+ CD45RA+ CD8+ T cell (AC) | SA | Weighted mode | 54 | 0.265 | 0.997 | 0.991 | 1.003 |  |  |  |  |  |
| GCST90001694 | CD28- CD4-CD8- T cell (%T cell) | SA | MR Egger | 22 | 0.072 | 1.042 | 0.999 | 1.086 | 17.065 | 0.649 |  |  |  |
| GCST90001694 | CD28- CD4-CD8- T cell (%T cell) | SA | Weighted median | 22 | 0.105 | 1.036 | 0.993 | 1.082 |  |  |  |  |  |
| GCST90001694 | CD28- CD4-CD8- T cell (%T cell) | SA | Inverse variance weighted | 22 | 0.028 | 1.032 | 1.003 | 1.061 | 17.420 | 0.685 | -0.003 | 0.558 | 0.735 |
| GCST90001694 | CD28- CD4-CD8- T cell (%T cell) | SA | Simple mode | 22 | 0.310 | 1.037 | 0.968 | 1.110 |  |  |  |  |  |
| GCST90001694 | CD28- CD4-CD8- T cell (%T cell) | SA | Weighted mode | 22 | 0.085 | 1.037 | 0.997 | 1.079 |  |  |  |  |  |
| GCST90001766 | CD24 on IgD+ CD38- B cell | SA | MR Egger | 21 | 0.104 | 1.024 | 0.997 | 1.052 | 8.626 | 0.979 |  |  |  |
| GCST90001766 | CD24 on IgD+ CD38- B cell | SA | Weighted median | 21 | 0.108 | 1.022 | 0.995 | 1.049 |  |  |  |  |  |
| GCST90001766 | CD24 on IgD+ CD38- B cell | SA | Inverse variance weighted | 21 | 0.022 | 1.024 | 1.003 | 1.044 | 8.628 | 0.987 | <0.001 | 0.964 | 0.987 |
| GCST90001766 | CD24 on IgD+ CD38- B cell | SA | Simple mode | 21 | 0.209 | 1.027 | 0.986 | 1.070 |  |  |  |  |  |
| GCST90001766 | CD24 on IgD+ CD38- B cell | SA | Weighted mode | 21 | 0.104 | 1.022 | 0.997 | 1.048 |  |  |  |  |  |
| GCST90001783 | CD25 on IgD+ CD38+ B cell | SA | MR Egger | 13 | 0.810 | 1.013 | 0.917 | 1.118 | 12.003 | 0.363 |  |  |  |
| GCST90001783 | CD25 on IgD+ CD38+ B cell | SA | Weighted median | 13 | 0.034 | 1.068 | 1.005 | 1.134 |  |  |  |  |  |
| GCST90001783 | CD25 on IgD+ CD38+ B cell | SA | Inverse variance weighted | 13 | 0.012 | 1.055 | 1.012 | 1.100 | 12.865 | 0.379 | 0.009 | 0.393 | 0.453 |
| GCST90001783 | CD25 on IgD+ CD38+ B cell | SA | Simple mode | 13 | 0.197 | 1.069 | 0.971 | 1.177 |  |  |  |  |  |
| GCST90001783 | CD25 on IgD+ CD38+ B cell | SA | Weighted mode | 13 | 0.080 | 1.073 | 0.998 | 1.154 |  |  |  |  |  |
| GCST90001789 | CD25 on IgD- CD38dim B cell | SA | MR Egger | 20 | 0.025 | 0.943 | 0.900 | 0.988 | 11.928 | 0.851 |  |  |  |
| GCST90001789 | CD25 on IgD- CD38dim B cell | SA | Weighted median | 20 | 0.088 | 0.960 | 0.917 | 1.006 |  |  |  |  |  |
| GCST90001789 | CD25 on IgD- CD38dim B cell | SA | Inverse variance weighted | 20 | 0.001 | 0.949 | 0.920 | 0.978 | 12.032 | 0.884 | 0.002 | 0.751 | 0.905 |
| GCST90001789 | CD25 on IgD- CD38dim B cell | SA | Simple mode | 20 | 0.069 | 0.934 | 0.871 | 1.001 |  |  |  |  |  |
| GCST90001789 | CD25 on IgD- CD38dim B cell | SA | Weighted mode | 20 | 0.030 | 0.949 | 0.908 | 0.992 |  |  |  |  |  |
| GCST90001795 | CD25 on transitional B cell | SA | MR Egger | 22 | 0.127 | 1.040 | 0.991 | 1.091 | 19.245 | 0.506 |  |  |  |
| GCST90001795 | CD25 on transitional B cell | SA | Weighted median | 22 | 0.003 | 1.070 | 1.023 | 1.118 |  |  |  |  |  |
| GCST90001795 | CD25 on transitional B cell | SA | Inverse variance weighted | 22 | 0.003 | 1.048 | 1.016 | 1.081 | 19.442 | 0.557 | 0.003 | 0.662 | 0.593 |
| GCST90001795 | CD25 on transitional B cell | SA | Simple mode | 22 | 0.046 | 1.088 | 1.007 | 1.175 |  |  |  |  |  |
| GCST90001795 | CD25 on transitional B cell | SA | Weighted mode | 22 | 0.010 | 1.074 | 1.022 | 1.128 |  |  |  |  |  |
| GCST90001809 | CD38 on CD20- B cell | SA | MR Egger | 19 | 0.532 | 1.038 | 0.926 | 1.162 | 18.860 | 0.337 |  |  |  |
| GCST90001809 | CD38 on CD20- B cell | SA | Weighted median | 19 | 0.007 | 0.913 | 0.854 | 0.975 |  |  |  |  |  |
| GCST90001809 | CD38 on CD20- B cell | SA | Inverse variance weighted | 19 | 0.029 | 0.945 | 0.898 | 0.994 | 22.387 | 0.215 | -0.017 | 0.092 | 0.261 |
| GCST90001809 | CD38 on CD20- B cell | SA | Simple mode | 19 | 0.080 | 0.895 | 0.795 | 1.006 |  |  |  |  |  |
| GCST90001809 | CD38 on CD20- B cell | SA | Weighted mode | 19 | 0.048 | 0.886 | 0.792 | 0.991 |  |  |  |  |  |
| GCST90001843 | CD3 on Effector Memory CD4+ T cell | SA | MR Egger | 19 | 0.068 | 1.037 | 1.000 | 1.076 | 13.360 | 0.712 |  |  |  |
| GCST90001843 | CD3 on Effector Memory CD4+ T cell | SA | Weighted median | 19 | 0.018 | 1.039 | 1.006 | 1.072 |  |  |  |  |  |
| GCST90001843 | CD3 on Effector Memory CD4+ T cell | SA | Inverse variance weighted | 19 | 0.024 | 1.027 | 1.004 | 1.051 | 13.797 | 0.742 | -0.004 | 0.518 | 0.791 |
| GCST90001843 | CD3 on Effector Memory CD4+ T cell | SA | Simple mode | 19 | 0.230 | 1.033 | 0.981 | 1.088 |  |  |  |  |  |
| GCST90001843 | CD3 on Effector Memory CD4+ T cell | SA | Weighted mode | 19 | 0.135 | 1.029 | 0.993 | 1.067 |  |  |  |  |  |
| GCST90001848 | CD3 on Natural Killer T cell | SA | MR Egger | 17 | 0.191 | 0.970 | 0.929 | 1.013 | 7.304 | 0.949 |  |  |  |
| GCST90001848 | CD3 on Natural Killer T cell | SA | Weighted median | 17 | 0.094 | 0.963 | 0.921 | 1.006 |  |  |  |  |  |
| GCST90001848 | CD3 on Natural Killer T cell | SA | Inverse variance weighted | 17 | 0.020 | 0.965 | 0.936 | 0.994 | 7.423 | 0.964 | -0.002 | 0.735 | 0.970 |
| GCST90001848 | CD3 on Natural Killer T cell | SA | Simple mode | 17 | 0.462 | 0.976 | 0.916 | 1.040 |  |  |  |  |  |
| GCST90001848 | CD3 on Natural Killer T cell | SA | Weighted mode | 17 | 0.120 | 0.965 | 0.925 | 1.007 |  |  |  |  |  |
| GCST90001902 | CD28 on activated CD4 regulatory T cell | SA | MR Egger | 18 | 0.048 | 1.039 | 1.003 | 1.075 | 11.905 | 0.750 |  |  |  |
| GCST90001902 | CD28 on activated CD4 regulatory T cell | SA | Weighted median | 18 | 0.009 | 1.047 | 1.012 | 1.084 |  |  |  |  |  |
| GCST90001902 | CD28 on activated CD4 regulatory T cell | SA | Inverse variance weighted | 18 | 0.037 | 1.027 | 1.002 | 1.053 | 12.769 | 0.752 | -0.005 | 0.366 | 0.734 |
| GCST90001902 | CD28 on activated CD4 regulatory T cell | SA | Simple mode | 18 | 0.195 | 1.042 | 0.982 | 1.106 |  |  |  |  |  |
| GCST90001902 | CD28 on activated CD4 regulatory T cell | SA | Weighted mode | 18 | 0.036 | 1.047 | 1.007 | 1.090 |  |  |  |  |  |
| GCST90001927 | CD127 on CD8+ T cell | SA | MR Egger | 24 | 0.054 | 0.940 | 0.886 | 0.998 | 15.771 | 0.827 |  |  |  |
| GCST90001927 | CD127 on CD8+ T cell | SA | Weighted median | 24 | 0.056 | 0.955 | 0.911 | 1.001 |  |  |  |  |  |
| GCST90001927 | CD127 on CD8+ T cell | SA | Inverse variance weighted | 24 | 0.007 | 0.958 | 0.928 | 0.989 | 16.297 | 0.842 | 0.004 | 0.476 | 0.844 |
| GCST90001927 | CD127 on CD8+ T cell | SA | Simple mode | 24 | 0.045 | 0.923 | 0.858 | 0.994 |  |  |  |  |  |
| GCST90001927 | CD127 on CD8+ T cell | SA | Weighted mode | 24 | 0.076 | 0.947 | 0.895 | 1.003 |  |  |  |  |  |
| GCST90001992 | CCR2 on CD14+ CD16+ monocyte | SA | MR Egger | 37 | 0.019 | 0.975 | 0.955 | 0.995 | 58.482 | 0.008 |  |  |  |
| GCST90001992 | CCR2 on CD14+ CD16+ monocyte | SA | Weighted median | 37 | 0.009 | 0.975 | 0.956 | 0.994 |  |  |  |  |  |
| GCST90001992 | CCR2 on CD14+ CD16+ monocyte | SA | Inverse variance weighted | 37 | 0.004 | 0.976 | 0.959 | 0.992 | 58.534 | 0.010 | 0.001 | 0.861 | 0.019 |
| GCST90001992 | CCR2 on CD14+ CD16+ monocyte | SA | Simple mode | 37 | 0.053 | 0.972 | 0.945 | 0.999 |  |  |  |  |  |
| GCST90001992 | CCR2 on CD14+ CD16+ monocyte | SA | Weighted mode | 37 | 0.005 | 0.976 | 0.961 | 0.992 |  |  |  |  |  |
| GCST90002040 | CD80 on granulocyte | SA | MR Egger | 31 | 0.012 | 0.956 | 0.925 | 0.988 | 32.446 | 0.301 |  |  |  |
| GCST90002040 | CD80 on granulocyte | SA | Weighted median | 31 | 0.019 | 0.960 | 0.927 | 0.993 |  |  |  |  |  |
| GCST90002040 | CD80 on granulocyte | SA | Inverse variance weighted | 31 | 0.003 | 0.967 | 0.946 | 0.989 | 33.357 | 0.307 | 0.004 | 0.374 | 0.321 |
| GCST90002040 | CD80 on granulocyte | SA | Simple mode | 31 | 0.403 | 0.976 | 0.923 | 1.032 |  |  |  |  |  |
| GCST90002040 | CD80 on granulocyte | SA | Weighted mode | 31 | 0.008 | 0.955 | 0.926 | 0.986 |  |  |  |  |  |
| GCST90002047 | CD45 on GR−MDSC | SA | MR Egger | 18 | 0.012 | 0.925 | 0.876 | 0.976 | 19.100 | 0.264 |  |  |  |
| GCST90002047 | CD45 on GR−MDSC | SA | Weighted median | 18 | 0.008 | 0.951 | 0.917 | 0.987 |  |  |  |  |  |
| GCST90002047 | CD45 on GR−MDSC | SA | Inverse variance weighted | 18 | 0.021 | 0.967 | 0.940 | 0.995 | 23.274 | 0.141 | 0.017 | 0.080 | 0.154 |
| GCST90002047 | CD45 on GR−MDSC | SA | Simple mode | 18 | 0.049 | 0.938 | 0.884 | 0.995 |  |  |  |  |  |
| GCST90002047 | CD45 on GR−MDSC | SA | Weighted mode | 18 | 0.016 | 0.947 | 0.909 | 0.986 |  |  |  |  |  |
| GCST90002060 | CD8 on HLA DR+ CD8+ T cell | SA | MR Egger | 25 | 0.110 | 1.020 | 0.996 | 1.044 | 17.845 | 0.766 |  |  |  |
| GCST90002060 | CD8 on HLA DR+ CD8+ T cell | SA | Weighted median | 25 | 0.143 | 1.018 | 0.994 | 1.043 |  |  |  |  |  |
| GCST90002060 | CD8 on HLA DR+ CD8+ T cell | SA | Inverse variance weighted | 25 | 0.034 | 1.020 | 1.002 | 1.038 | 17.846 | 0.810 | <0.001 | 0.970 | 0.852 |
| GCST90002060 | CD8 on HLA DR+ CD8+ T cell | SA | Simple mode | 25 | 0.518 | 1.014 | 0.973 | 1.058 |  |  |  |  |  |
| GCST90002060 | CD8 on HLA DR+ CD8+ T cell | SA | Weighted mode | 25 | 0.175 | 1.016 | 0.994 | 1.039 |  |  |  |  |  |

Table S5. Reverse mendelian randomization estimates the causal link between spontaneous abortion and the 25 immune cells.

| id.exposure | exposure | outcome | outcome_id | method | nsnp | pval | or | or_lci95 | or_uci95 | Q | Q_pval | egger_intercept | Pleiotropy_pval | MR_PRESSO  Global Test pval |
| --- | --- | --- | --- | --- | --- | --- | --- | --- | --- | --- | --- | --- | --- | --- |
| finngen_R10_O15_ABORT_SPONTAN | SA | IgD+ CD38dim B cell | GCST90001394 | MR Egger | 9 | 0.342 | 0.698 | 0.349 | 1.394 | 2.075 | 0.956 |  |  |  |
| finngen_R10_O15_ABORT_SPONTAN | SA | IgD+ CD38dim B cell | GCST90001394 | Weighted median | 9 | 0.195 | 0.781 | 0.537 | 1.136 |  |  |  |  |  |
| finngen_R10_O15_ABORT_SPONTAN | SA | IgD+ CD38dim B cell | GCST90001394 | Inverse variance weighted | 9 | 0.313 | 0.857 | 0.635 | 1.157 | 2.493 | 0.962 | 0.018 | 0.539 | 0.958 |
| finngen_R10_O15_ABORT_SPONTAN | SA | IgD+ CD38dim B cell | GCST90001394 | Simple mode | 9 | 0.393 | 0.801 | 0.495 | 1.296 |  |  |  |  |  |
| finngen_R10_O15_ABORT_SPONTAN | SA | IgD+ CD38dim B cell | GCST90001394 | Weighted mode | 9 | 0.313 | 0.779 | 0.495 | 1.227 |  |  |  |  |  |
| finngen_R10_O15_ABORT_SPONTAN | SA | IgD+ CD24+ B cell (AC) | GCST90001412 | MR Egger | 9 | 0.617 | 0.829 | 0.411 | 1.672 | 6.681 | 0.463 |  |  |  |
| finngen_R10_O15_ABORT_SPONTAN | SA | IgD+ CD24+ B cell (AC) | GCST90001412 | Weighted median | 9 | 0.533 | 0.874 | 0.571 | 1.337 |  |  |  |  |  |
| finngen_R10_O15_ABORT_SPONTAN | SA | IgD+ CD24+ B cell (AC) | GCST90001412 | Inverse variance weighted | 9 | 0.779 | 1.044 | 0.771 | 1.415 | 7.193 | 0.516 | 0.021 | 0.498 | 0.545 |
| finngen_R10_O15_ABORT_SPONTAN | SA | IgD+ CD24+ B cell (AC) | GCST90001412 | Simple mode | 9 | 0.979 | 1.008 | 0.579 | 1.755 |  |  |  |  |  |
| finngen_R10_O15_ABORT_SPONTAN | SA | IgD+ CD24+ B cell (AC) | GCST90001412 | Weighted mode | 9 | 0.714 | 0.911 | 0.565 | 1.471 |  |  |  |  |  |
| finngen_R10_O15_ABORT_SPONTAN | SA | Unswitched memory B cell | GCST90001432 | MR Egger | 9 | 0.278 | 0.655 | 0.323 | 1.327 | 6.035 | 0.536 |  |  |  |
| finngen_R10_O15_ABORT_SPONTAN | SA | Unswitched memory B cell | GCST90001432 | Weighted median | 9 | 0.944 | 0.985 | 0.654 | 1.485 |  |  |  |  |  |
| finngen_R10_O15_ABORT_SPONTAN | SA | Unswitched memory B cell | GCST90001432 | Inverse variance weighted | 9 | 0.935 | 1.013 | 0.746 | 1.375 | 7.839 | 0.449 | 0.039 | 0.221 | 0.461 |
| finngen_R10_O15_ABORT_SPONTAN | SA | Unswitched memory B cell | GCST90001432 | Simple mode | 9 | 0.257 | 1.499 | 0.783 | 2.869 |  |  |  |  |  |
| finngen_R10_O15_ABORT_SPONTAN | SA | Unswitched memory B cell | GCST90001432 | Weighted mode | 9 | 0.588 | 0.863 | 0.519 | 1.437 |  |  |  |  |  |
| finngen_R10_O15_ABORT_SPONTAN | SA | IgD+CD24+ B cell(%lymphocyte) | GCST90001439 | MR Egger | 9 | 0.637 | 0.828 | 0.391 | 1.752 | 7.786 | 0.352 |  |  |  |
| finngen_R10_O15_ABORT_SPONTAN | SA | IgD+CD24+ B cell(%lymphocyte) | GCST90001439 | Weighted median | 9 | 0.944 | 1.015 | 0.671 | 1.536 |  |  |  |  |  |
| finngen_R10_O15_ABORT_SPONTAN | SA | IgD+CD24+ B cell(%lymphocyte) | GCST90001439 | Inverse variance weighted | 9 | 0.769 | 1.048 | 0.766 | 1.435 | 8.306 | 0.404 | -0.013 | 0.516 | 0.407 |
| finngen_R10_O15_ABORT_SPONTAN | SA | IgD+CD24+ B cell(%lymphocyte) | GCST90001439 | Simple mode | 9 | 0.659 | 1.148 | 0.636 | 2.075 |  |  |  |  |  |
| finngen_R10_O15_ABORT_SPONTAN | SA | IgD+CD24+ B cell(%lymphocyte) | GCST90001439 | Weighted mode | 9 | 0.757 | 0.918 | 0.546 | 1.545 |  |  |  |  |  |
| finngen_R10_O15_ABORT_SPONTAN | SA | CD24+ CD27+B cell | GCST90001442 | MR Egger | 9 | 0.202 | 0.603 | 0.298 | 1.220 | 6.686 | 0.462 |  |  |  |
| finngen_R10_O15_ABORT_SPONTAN | SA | CD24+ CD27+B cell | GCST90001442 | Weighted median | 9 | 0.801 | 0.948 | 0.627 | 1.435 |  |  |  |  |  |
| finngen_R10_O15_ABORT_SPONTAN | SA | CD24+ CD27+B cell | GCST90001442 | Inverse variance weighted | 9 | 0.827 | 1.038 | 0.744 | 1.448 | 9.497 | 0.302 | 0.048 | 0.138 | 0.321 |
| finngen_R10_O15_ABORT_SPONTAN | SA | CD24+ CD27+B cell | GCST90001442 | Simple mode | 9 | 0.747 | 1.110 | 0.602 | 2.047 |  |  |  |  |  |
| finngen_R10_O15_ABORT_SPONTAN | SA | CD24+ CD27+B cell | GCST90001442 | Weighted mode | 9 | 0.672 | 0.901 | 0.565 | 1.436 |  |  |  |  |  |
| finngen_R10_O15_ABORT_SPONTAN | SA | CD33+HLA_DR+CD14− Myeloid cell | GCST90001518 | MR Egger | 9 | 0.970 | 0.973 | 0.257 | 3.692 | 13.263 | 0.066 |  |  |  |
| finngen_R10_O15_ABORT_SPONTAN | SA | CD33+HLA_DR+CD14− Myeloid cell | GCST90001518 | Weighted median | 9 | 0.800 | 0.930 | 0.530 | 1.631 |  |  |  |  |  |
| finngen_R10_O15_ABORT_SPONTAN | SA | CD33+HLA_DR+CD14− Myeloid cell | GCST90001518 | Inverse variance weighted | 9 | 0.532 | 0.841 | 0.489 | 1.447 | 13.370 | 0.100 | -0.013 | 0.819 | 0.125 |
| finngen_R10_O15_ABORT_SPONTAN | SA | CD33+HLA_DR+CD14− Myeloid cell | GCST90001518 | Simple mode | 9 | 0.868 | 0.932 | 0.417 | 2.083 |  |  |  |  |  |
| finngen_R10_O15_ABORT_SPONTAN | SA | CD33+HLA_DR+CD14− Myeloid cell | GCST90001518 | Weighted mode | 9 | 0.943 | 0.975 | 0.495 | 1.919 |  |  |  |  |  |
| finngen_R10_O15_ABORT_SPONTAN | SA | CD45RA- CD4+ T cell | GCST90001536 | MR Egger | 9 | 0.085 | 0.491 | 0.245 | 0.985 | 4.605 | 0.708 |  |  |  |
| finngen_R10_O15_ABORT_SPONTAN | SA | CD45RA- CD4+ T cell | GCST90001536 | Weighted median | 9 | 0.830 | 0.955 | 0.628 | 1.452 |  |  |  |  |  |
| finngen_R10_O15_ABORT_SPONTAN | SA | CD45RA- CD4+ T cell | GCST90001536 | Inverse variance weighted | 9 | 0.491 | 1.135 | 0.791 | 1.629 | 11.468 | 0.177 | 0.075 | 0.034 | 0.187 |
| finngen_R10_O15_ABORT_SPONTAN | SA | CD45RA- CD4+ T cell | GCST90001536 | Simple mode | 9 | 0.978 | 1.009 | 0.558 | 1.823 |  |  |  |  |  |
| finngen_R10_O15_ABORT_SPONTAN | SA | CD45RA- CD4+ T cell | GCST90001536 | Weighted mode | 9 | 0.754 | 0.923 | 0.569 | 1.498 |  |  |  |  |  |
| finngen_R10_O15_ABORT_SPONTAN | SA | Central MemoryCD4+ T cell | GCST90001539 | MR Egger | 9 | 0.528 | 0.776 | 0.367 | 1.640 | 6.339 | 0.501 |  |  |  |
| finngen_R10_O15_ABORT_SPONTAN | SA | Central MemoryCD4+ T cell | GCST90001539 | Weighted median | 9 | 0.097 | 1.482 | 0.932 | 2.356 |  |  |  |  |  |
| finngen_R10_O15_ABORT_SPONTAN | SA | Central MemoryCD4+ T cell | GCST90001539 | Inverse variance weighted | 9 | 0.050 | 1.422 | 0.999 | 2.024 | 9.440 | 0.307 | 0.054 | 0.122 | 0.265 |
| finngen_R10_O15_ABORT_SPONTAN | SA | Central MemoryCD4+ T cell | GCST90001539 | Simple mode | 9 | 0.071 | 2.089 | 1.044 | 4.180 |  |  |  |  |  |
| finngen_R10_O15_ABORT_SPONTAN | SA | Central MemoryCD4+ T cell | GCST90001539 | Weighted mode | 9 | 0.106 | 1.949 | 0.950 | 3.997 |  |  |  |  |  |
| finngen_R10_O15_ABORT_SPONTAN | SA | CD4+ T cell | GCST90001590 | MR Egger | 9 | 0.709 | 1.154 | 0.560 | 2.381 | 7.389 | 0.390 |  |  |  |
| finngen_R10_O15_ABORT_SPONTAN | SA | CD4+ T cell | GCST90001590 | Weighted median | 9 | 0.407 | 1.195 | 0.785 | 1.820 |  |  |  |  |  |
| finngen_R10_O15_ABORT_SPONTAN | SA | CD4+ T cell | GCST90001590 | Inverse variance weighted | 9 | 0.331 | 1.164 | 0.857 | 1.583 | 7.389 | 0.495 | 0.001 | 0.980 | 0.472 |
| finngen_R10_O15_ABORT_SPONTAN | SA | CD4+ T cell | GCST90001590 | Simple mode | 9 | 0.475 | 0.788 | 0.422 | 1.470 |  |  |  |  |  |
| finngen_R10_O15_ABORT_SPONTAN | SA | CD4+ T cell | GCST90001590 | Weighted mode | 9 | 0.475 | 0.802 | 0.449 | 1.430 |  |  |  |  |  |
| finngen_R10_O15_ABORT_SPONTAN | SA | CD8+ T cell | GCST90001592 | MR Egger | 9 | 0.586 | 1.237 | 0.596 | 2.568 | 7.910 | 0.341 |  |  |  |
| finngen_R10_O15_ABORT_SPONTAN | SA | CD8+ T cell | GCST90001592 | Weighted median | 9 | 0.304 | 0.796 | 0.516 | 1.229 |  |  |  |  |  |
| finngen_R10_O15_ABORT_SPONTAN | SA | CD8+ T cell | GCST90001592 | Inverse variance weighted | 9 | 0.112 | 0.760 | 0.541 | 1.066 | 10.293 | 0.245 | -0.044 | 0.190 | 0.245 |
| finngen_R10_O15_ABORT_SPONTAN | SA | CD8+ T cell | GCST90001592 | Simple mode | 9 | 0.273 | 0.683 | 0.363 | 1.288 |  |  |  |  |  |
| finngen_R10_O15_ABORT_SPONTAN | SA | CD8+ T cell | GCST90001592 | Weighted mode | 9 | 0.835 | 0.940 | 0.538 | 1.645 |  |  |  |  |  |
| finngen_R10_O15_ABORT_SPONTAN | SA | CD28- CD4-CD8- T cell （%CD4-CD8- T cell） | GCST90001653 | MR Egger | 9 | 0.425 | 0.729 | 0.350 | 1.516 | 2.830 | 0.900 |  |  |  |
| finngen_R10_O15_ABORT_SPONTAN | SA | CD28- CD4-CD8- T cell （%CD4-CD8- T cell） | GCST90001653 | Weighted median | 9 | 0.385 | 0.833 | 0.551 | 1.259 |  |  |  |  |  |
| finngen_R10_O15_ABORT_SPONTAN | SA | CD28- CD4-CD8- T cell （%CD4-CD8- T cell） | GCST90001653 | Inverse variance weighted | 9 | 0.449 | 0.885 | 0.644 | 1.215 | 3.161 | 0.924 | 0.017 | 0.583 | 0.913 |
| finngen_R10_O15_ABORT_SPONTAN | SA | CD28- CD4-CD8- T cell （%CD4-CD8- T cell） | GCST90001653 | Simple mode | 9 | 0.863 | 0.951 | 0.547 | 1.653 |  |  |  |  |  |
| finngen_R10_O15_ABORT_SPONTAN | SA | CD28- CD4-CD8- T cell （%CD4-CD8- T cell） | GCST90001653 | Weighted mode | 9 | 0.460 | 0.821 | 0.499 | 1.352 |  |  |  |  |  |
| finngen_R10_O15_ABORT_SPONTAN | SA | CD28+CD4−CD8− T cell | GCST90001656 | MR Egger | 9 | 0.425 | 1.372 | 0.659 | 2.855 | 2.830 | 0.900 |  |  |  |
| finngen_R10_O15_ABORT_SPONTAN | SA | CD28+CD4−CD8− T cell | GCST90001656 | Weighted median | 9 | 0.378 | 1.201 | 0.799 | 1.805 |  |  |  |  |  |
| finngen_R10_O15_ABORT_SPONTAN | SA | CD28+CD4−CD8− T cell | GCST90001656 | Inverse variance weighted | 9 | 0.449 | 1.130 | 0.823 | 1.552 | 3.161 | 0.924 | -0.017 | 0.583 | 0.911 |
| finngen_R10_O15_ABORT_SPONTAN | SA | CD28+CD4−CD8− T cell | GCST90001656 | Simple mode | 9 | 0.867 | 1.051 | 0.595 | 1.858 |  |  |  |  |  |
| finngen_R10_O15_ABORT_SPONTAN | SA | CD28+CD4−CD8− T cell | GCST90001656 | Weighted mode | 9 | 0.492 | 1.218 | 0.712 | 2.084 |  |  |  |  |  |
| finngen_R10_O15_ABORT_SPONTAN | SA | Granulocyte TBNK | GCST90001652 | MR Egger | 9 | 0.077 | 0.469 | 0.229 | 0.961 | 6.101 | 0.528 |  |  |  |
| finngen_R10_O15_ABORT_SPONTAN | SA | Granulocyte TBNK | GCST90001652 | Weighted median | 9 | 0.521 | 0.868 | 0.563 | 1.338 |  |  |  |  |  |
| finngen_R10_O15_ABORT_SPONTAN | SA | Granulocyte TBNK | GCST90001652 | Inverse variance weighted | 9 | 0.973 | 0.994 | 0.686 | 1.439 | 11.295 | 0.186 | 0.067 | 0.057 | 0.202 |
| finngen_R10_O15_ABORT_SPONTAN | SA | Granulocyte TBNK | GCST90001652 | Simple mode | 9 | 0.746 | 0.903 | 0.497 | 1.639 |  |  |  |  |  |
| finngen_R10_O15_ABORT_SPONTAN | SA | Granulocyte TBNK | GCST90001652 | Weighted mode | 9 | 0.369 | 0.777 | 0.463 | 1.306 |  |  |  |  |  |
| finngen_R10_O15_ABORT_SPONTAN | SA | CD28- CD8dim T cell | GCST90001662 | MR Egger | 9 | 0.342 | 0.688 | 0.335 | 1.412 | 2.889 | 0.895 |  |  |  |
| finngen_R10_O15_ABORT_SPONTAN | SA | CD28- CD8dim T cell | GCST90001662 | Weighted median | 9 | 0.294 | 0.812 | 0.551 | 1.197 |  |  |  |  |  |
| finngen_R10_O15_ABORT_SPONTAN | SA | CD28- CD8dim T cell | GCST90001662 | Inverse variance weighted | 9 | 0.559 | 0.911 | 0.667 | 1.245 | 3.613 | 0.890 | 0.025 | 0.423 | 0.889 |
| finngen_R10_O15_ABORT_SPONTAN | SA | CD28- CD8dim T cell | GCST90001662 | Simple mode | 9 | 0.566 | 0.856 | 0.513 | 1.426 |  |  |  |  |  |
| finngen_R10_O15_ABORT_SPONTAN | SA | CD28- CD8dim T cell | GCST90001662 | Weighted mode | 9 | 0.428 | 0.817 | 0.509 | 1.312 |  |  |  |  |  |
| finngen_R10_O15_ABORT_SPONTAN | SA | CD28−CD127−CD25++CD8+ T cell | GCST90001673 | MR Egger | 9 | 0.219 | 2.199 | 0.700 | 6.904 | 16.708 | 0.019 |  |  |  |
| finngen_R10_O15_ABORT_SPONTAN | SA | CD28−CD127−CD25++CD8+ T cell | GCST90001673 | Weighted median | 9 | 0.549 | 1.142 | 0.740 | 1.761 |  |  |  |  |  |
| finngen_R10_O15_ABORT_SPONTAN | SA | CD28−CD127−CD25++CD8+ T cell | GCST90001673 | Inverse variance weighted | 9 | 0.674 | 0.889 | 0.512 | 1.542 | 23.775 | 0.002 | -0.080 | 0.129 | 0.136 |
| finngen_R10_O15_ABORT_SPONTAN | SA | CD28−CD127−CD25++CD8+ T cell | GCST90001673 | Simple mode | 9 | 0.764 | 0.894 | 0.442 | 1.810 |  |  |  |  |  |
| finngen_R10_O15_ABORT_SPONTAN | SA | CD28−CD127−CD25++CD8+ T cell | GCST90001673 | Weighted mode | 9 | 0.443 | 1.203 | 0.768 | 1.883 |  |  |  |  |  |
| finngen_R10_O15_ABORT_SPONTAN | SA | CD25++CD8+ T cell | GCST90001679 | MR Egger | 9 | 0.966 | 0.979 | 0.383 | 2.501 | 10.452 | 0.164 |  |  |  |
| finngen_R10_O15_ABORT_SPONTAN | SA | CD25++CD8+ T cell | GCST90001679 | Weighted median | 9 | 0.189 | 0.750 | 0.488 | 1.152 |  |  |  |  |  |
| finngen_R10_O15_ABORT_SPONTAN | SA | CD25++CD8+ T cell | GCST90001679 | Inverse variance weighted | 9 | 0.212 | 0.782 | 0.531 | 1.151 | 10.859 | 0.210 | -0.020 | 0.618 | 0.329 |
| finngen_R10_O15_ABORT_SPONTAN | SA | CD25++CD8+ T cell | GCST90001679 | Simple mode | 9 | 0.610 | 0.863 | 0.500 | 1.487 |  |  |  |  |  |
| finngen_R10_O15_ABORT_SPONTAN | SA | CD25++CD8+ T cell | GCST90001679 | Weighted mode | 9 | 0.557 | 0.863 | 0.538 | 1.383 |  |  |  |  |  |
| finngen_R10_O15_ABORT_SPONTAN | SA | CD28- CD4-CD8- T cell (%T cell) | GCST90001694 | MR Egger | 9 | 0.733 | 0.873 | 0.413 | 1.845 | 5.189 | 0.637 |  |  |  |
| finngen_R10_O15_ABORT_SPONTAN | SA | CD28- CD4-CD8- T cell (%T cell) | GCST90001694 | Weighted median | 9 | 0.438 | 0.843 | 0.548 | 1.297 |  |  |  |  |  |
| finngen_R10_O15_ABORT_SPONTAN | SA | CD28- CD4-CD8- T cell (%T cell) | GCST90001694 | Inverse variance weighted | 9 | 0.729 | 0.944 | 0.683 | 1.306 | 5.240 | 0.732 | 0.007 | 0.827 | 0.723 |
| finngen_R10_O15_ABORT_SPONTAN | SA | CD28- CD4-CD8- T cell (%T cell) | GCST90001694 | Simple mode | 9 | 0.639 | 0.860 | 0.469 | 1.578 |  |  |  |  |  |
| finngen_R10_O15_ABORT_SPONTAN | SA | CD28- CD4-CD8- T cell (%T cell) | GCST90001694 | Weighted mode | 9 | 0.502 | 0.825 | 0.482 | 1.412 |  |  |  |  |  |
| finngen_R10_O15_ABORT_SPONTAN | SA | CD45RA+ CD28- CD8+ T cell (%T cell) | GCST90001700 | MR Egger | 9 | 0.845 | 1.573 | 0.020 | 125.217 | 5.998 | 0.540 |  |  |  |
| finngen_R10_O15_ABORT_SPONTAN | SA | CD45RA+ CD28- CD8+ T cell (%T cell) | GCST90001700 | Weighted median | 9 | 0.042 | 0.069 | 0.005 | 0.903 |  |  |  |  |  |
| finngen_R10_O15_ABORT_SPONTAN | SA | CD45RA+ CD28- CD8+ T cell (%T cell) | GCST90001700 | Inverse variance weighted | 9 | 0.063 | 0.165 | 0.025 | 1.099 | 7.251 | 0.510 | -0.200 | 0.300 | 0.476 |
| finngen_R10_O15_ABORT_SPONTAN | SA | CD45RA+ CD28- CD8+ T cell (%T cell) | GCST90001700 | Simple mode | 9 | 0.140 | 0.049 | 0.001 | 1.816 |  |  |  |  |  |
| finngen_R10_O15_ABORT_SPONTAN | SA | CD45RA+ CD28- CD8+ T cell (%T cell) | GCST90001700 | Weighted mode | 9 | 0.131 | 0.055 | 0.002 | 1.622 |  |  |  |  |  |
| finngen_R10_O15_ABORT_SPONTAN | SA | CD24 on IgD+ CD38- B cell | GCST90001766 | MR Egger | 9 | 0.079 | 0.469 | 0.227 | 0.966 | 5.219 | 0.633 |  |  |  |
| finngen_R10_O15_ABORT_SPONTAN | SA | CD24 on IgD+ CD38- B cell | GCST90001766 | Weighted median | 9 | 0.294 | 0.790 | 0.508 | 1.227 |  |  |  |  |  |
| finngen_R10_O15_ABORT_SPONTAN | SA | CD24 on IgD+ CD38- B cell | GCST90001766 | Inverse variance weighted | 9 | 0.951 | 1.011 | 0.706 | 1.449 | 10.560 | 0.228 | 0.068 | 0.054 | 0.250 |
| finngen_R10_O15_ABORT_SPONTAN | SA | CD24 on IgD+ CD38- B cell | GCST90001766 | Simple mode | 9 | 0.815 | 1.078 | 0.584 | 1.991 |  |  |  |  |  |
| finngen_R10_O15_ABORT_SPONTAN | SA | CD24 on IgD+ CD38- B cell | GCST90001766 | Weighted mode | 9 | 0.831 | 0.944 | 0.567 | 1.572 |  |  |  |  |  |
| finngen_R10_O15_ABORT_SPONTAN | SA | CD25 on IgD+ CD38+ B cell | GCST90001783 | MR Egger | 9 | 0.597 | 0.796 | 0.355 | 1.787 | 9.110 | 0.245 |  |  |  |
| finngen_R10_O15_ABORT_SPONTAN | SA | CD25 on IgD+ CD38+ B cell | GCST90001783 | Weighted median | 9 | 0.221 | 0.753 | 0.478 | 1.185 |  |  |  |  |  |
| finngen_R10_O15_ABORT_SPONTAN | SA | CD25 on IgD+ CD38+ B cell | GCST90001783 | Inverse variance weighted | 9 | 0.621 | 0.920 | 0.661 | 1.281 | 9.307 | 0.317 | 0.013 | 0.708 | 0.290 |
| finngen_R10_O15_ABORT_SPONTAN | SA | CD25 on IgD+ CD38+ B cell | GCST90001783 | Simple mode | 9 | 0.435 | 0.739 | 0.359 | 1.520 |  |  |  |  |  |
| finngen_R10_O15_ABORT_SPONTAN | SA | CD25 on IgD+ CD38+ B cell | GCST90001783 | Weighted mode | 9 | 0.233 | 0.656 | 0.346 | 1.244 |  |  |  |  |  |
| finngen_R10_O15_ABORT_SPONTAN | SA | CD25 on IgD- CD38dim B cell | GCST90001789 | MR Egger | 9 | 0.458 | 0.733 | 0.337 | 1.592 | 8.574 | 0.285 |  |  |  |
| finngen_R10_O15_ABORT_SPONTAN | SA | CD25 on IgD- CD38dim B cell | GCST90001789 | Weighted median | 9 | 0.305 | 1.258 | 0.812 | 1.948 |  |  |  |  |  |
| finngen_R10_O15_ABORT_SPONTAN | SA | CD25 on IgD- CD38dim B cell | GCST90001789 | Inverse variance weighted | 9 | 0.526 | 1.118 | 0.792 | 1.576 | 10.287 | 0.245 | 0.038 | 0.276 | 0.224 |
| finngen_R10_O15_ABORT_SPONTAN | SA | CD25 on IgD- CD38dim B cell | GCST90001789 | Simple mode | 9 | 0.330 | 1.368 | 0.757 | 2.475 |  |  |  |  |  |
| finngen_R10_O15_ABORT_SPONTAN | SA | CD25 on IgD- CD38dim B cell | GCST90001789 | Weighted mode | 9 | 0.413 | 1.320 | 0.703 | 2.480 |  |  |  |  |  |
| finngen_R10_O15_ABORT_SPONTAN | SA | CD25 on transitional B cell | GCST90001795 | MR Egger | 9 | 0.180 | 0.542 | 0.242 | 1.212 | 8.922 | 0.258 |  |  |  |
| finngen_R10_O15_ABORT_SPONTAN | SA | CD25 on transitional B cell | GCST90001795 | Weighted median | 9 | 0.423 | 0.825 | 0.515 | 1.321 |  |  |  |  |  |
| finngen_R10_O15_ABORT_SPONTAN | SA | CD25 on transitional B cell | GCST90001795 | Inverse variance weighted | 9 | 0.311 | 0.832 | 0.583 | 1.187 | 10.629 | 0.224 | 0.038 | 0.285 | 0.195 |
| finngen_R10_O15_ABORT_SPONTAN | SA | CD25 on transitional B cell | GCST90001795 | Simple mode | 9 | 0.722 | 1.166 | 0.515 | 2.643 |  |  |  |  |  |
| finngen_R10_O15_ABORT_SPONTAN | SA | CD25 on transitional B cell | GCST90001795 | Weighted mode | 9 | 0.189 | 0.528 | 0.221 | 1.261 |  |  |  |  |  |
| finngen_R10_O15_ABORT_SPONTAN | SA | CD38 on CD20- B cell | GCST90001809 | MR Egger | 9 | 0.158 | 1.753 | 0.874 | 3.515 | 4.735 | 0.692 |  |  |  |
| finngen_R10_O15_ABORT_SPONTAN | SA | CD38 on CD20- B cell | GCST90001809 | Weighted median | 9 | 0.356 | 1.200 | 0.815 | 1.766 |  |  |  |  |  |
| finngen_R10_O15_ABORT_SPONTAN | SA | CD38 on CD20- B cell | GCST90001809 | Inverse variance weighted | 9 | 0.591 | 1.086 | 0.804 | 1.467 | 6.974 | 0.539 | -0.043 | 0.178 | 0.575 |
| finngen_R10_O15_ABORT_SPONTAN | SA | CD38 on CD20- B cell | GCST90001809 | Simple mode | 9 | 0.292 | 1.322 | 0.814 | 2.146 |  |  |  |  |  |
| finngen_R10_O15_ABORT_SPONTAN | SA | CD38 on CD20- B cell | GCST90001809 | Weighted mode | 9 | 0.333 | 1.265 | 0.809 | 1.978 |  |  |  |  |  |
| finngen_R10_O15_ABORT_SPONTAN | SA | CD3 on Effector Memory CD4+ T cell | GCST90001843 | MR Egger | 9 | 0.592 | 0.778 | 0.324 | 1.867 | 8.286 | 0.308 |  |  |  |
| finngen_R10_O15_ABORT_SPONTAN | SA | CD3 on Effector Memory CD4+ T cell | GCST90001843 | Weighted median | 9 | 0.361 | 0.801 | 0.498 | 1.289 |  |  |  |  |  |
| finngen_R10_O15_ABORT_SPONTAN | SA | CD3 on Effector Memory CD4+ T cell | GCST90001843 | Inverse variance weighted | 9 | 0.576 | 0.903 | 0.631 | 1.291 | 8.448 | 0.391 | 0.013 | 0.722 | 0.394 |
| finngen_R10_O15_ABORT_SPONTAN | SA | CD3 on Effector Memory CD4+ T cell | GCST90001843 | Simple mode | 9 | 0.640 | 0.851 | 0.443 | 1.634 |  |  |  |  |  |
| finngen_R10_O15_ABORT_SPONTAN | SA | CD3 on Effector Memory CD4+ T cell | GCST90001843 | Weighted mode | 9 | 0.389 | 0.788 | 0.473 | 1.315 |  |  |  |  |  |
| finngen_R10_O15_ABORT_SPONTAN | SA | CD3 on Natural Killer T cell | GCST90001848 | MR Egger | 9 | 0.759 | 1.200 | 0.391 | 3.685 | 15.085 | 0.035 |  |  |  |
| finngen_R10_O15_ABORT_SPONTAN | SA | CD3 on Natural Killer T cell | GCST90001848 | Weighted median | 9 | 0.870 | 1.041 | 0.643 | 1.685 |  |  |  |  |  |
| finngen_R10_O15_ABORT_SPONTAN | SA | CD3 on Natural Killer T cell | GCST90001848 | Inverse variance weighted | 9 | 0.894 | 0.969 | 0.611 | 1.537 | 15.455 | 0.051 | -0.019 | 0.691 | 0.083 |
| finngen_R10_O15_ABORT_SPONTAN | SA | CD3 on Natural Killer T cell | GCST90001848 | Simple mode | 9 | 0.715 | 1.134 | 0.593 | 2.167 |  |  |  |  |  |
| finngen_R10_O15_ABORT_SPONTAN | SA | CD3 on Natural Killer T cell | GCST90001848 | Weighted mode | 9 | 0.964 | 0.988 | 0.594 | 1.644 |  |  |  |  |  |
| finngen_R10_O15_ABORT_SPONTAN | SA | CD28 on activated CD4 regulatory T cell | GCST90001902 | MR Egger | 9 | 0.661 | 1.282 | 0.443 | 3.707 | 13.532 | 0.060 |  |  |  |
| finngen_R10_O15_ABORT_SPONTAN | SA | CD28 on activated CD4 regulatory T cell | GCST90001902 | Weighted median | 9 | 0.874 | 1.042 | 0.629 | 1.725 |  |  |  |  |  |
| finngen_R10_O15_ABORT_SPONTAN | SA | CD28 on activated CD4 regulatory T cell | GCST90001902 | Inverse variance weighted | 9 | 0.680 | 1.095 | 0.711 | 1.688 | 13.733 | 0.089 | -0.014 | 0.757 | 0.116 |
| finngen_R10_O15_ABORT_SPONTAN | SA | CD28 on activated CD4 regulatory T cell | GCST90001902 | Simple mode | 9 | 0.418 | 0.743 | 0.376 | 1.469 |  |  |  |  |  |
| finngen_R10_O15_ABORT_SPONTAN | SA | CD28 on activated CD4 regulatory T cell | GCST90001902 | Weighted mode | 9 | 0.966 | 1.013 | 0.570 | 1.802 |  |  |  |  |  |
| finngen_R10_O15_ABORT_SPONTAN | SA | CD127 on CD8+ T cell | GCST90001927 | MR Egger | 9 | 0.613 | 0.815 | 0.381 | 1.741 | 5.234 | 0.631 |  |  |  |
| finngen_R10_O15_ABORT_SPONTAN | SA | CD127 on CD8+ T cell | GCST90001927 | Weighted median | 9 | 0.460 | 1.181 | 0.760 | 1.835 |  |  |  |  |  |
| finngen_R10_O15_ABORT_SPONTAN | SA | CD127 on CD8+ T cell | GCST90001927 | Inverse variance weighted | 9 | 0.730 | 1.060 | 0.763 | 1.471 | 5.780 | 0.670 | 0.023 | 0.477 | 0.606 |
| finngen_R10_O15_ABORT_SPONTAN | SA | CD127 on CD8+ T cell | GCST90001927 | Simple mode | 9 | 0.478 | 1.236 | 0.707 | 2.162 |  |  |  |  |  |
| finngen_R10_O15_ABORT_SPONTAN | SA | CD127 on CD8+ T cell | GCST90001927 | Weighted mode | 9 | 0.479 | 1.243 | 0.700 | 2.208 |  |  |  |  |  |
| finngen_R10_O15_ABORT_SPONTAN | SA | CD25 on CD4+ T cell | GCST90001960 | MR Egger | 9 | 0.986 | 0.992 | 0.451 | 2.182 | 4.250 | 0.751 |  |  |  |
| finngen_R10_O15_ABORT_SPONTAN | SA | CD25 on CD4+ T cell | GCST90001960 | Weighted median | 9 | 0.573 | 1.128 | 0.742 | 1.715 |  |  |  |  |  |
| finngen_R10_O15_ABORT_SPONTAN | SA | CD25 on CD4+ T cell | GCST90001960 | Inverse variance weighted | 9 | 0.214 | 1.241 | 0.883 | 1.745 | 4.630 | 0.796 | 0.020 | 0.557 | 0.845 |
| finngen_R10_O15_ABORT_SPONTAN | SA | CD25 on CD4+ T cell | GCST90001960 | Simple mode | 9 | 0.753 | 1.092 | 0.643 | 1.852 |  |  |  |  |  |
| finngen_R10_O15_ABORT_SPONTAN | SA | CD25 on CD4+ T cell | GCST90001960 | Weighted mode | 9 | 0.679 | 1.107 | 0.696 | 1.759 |  |  |  |  |  |
| finngen_R10_O15_ABORT_SPONTAN | SA | CCR2 on CD14+ CD16+ monocyte | GCST90001992 | MR Egger | 9 | 0.496 | 1.296 | 0.638 | 2.631 | 5.010 | 0.659 |  |  |  |
| finngen_R10_O15_ABORT_SPONTAN | SA | CCR2 on CD14+ CD16+ monocyte | GCST90001992 | Weighted median | 9 | 0.591 | 1.118 | 0.744 | 1.682 |  |  |  |  |  |
| finngen_R10_O15_ABORT_SPONTAN | SA | CCR2 on CD14+ CD16+ monocyte | GCST90001992 | Inverse variance weighted | 9 | 0.539 | 1.101 | 0.811 | 1.494 | 5.262 | 0.729 | -0.015 | 0.631 | 0.740 |
| finngen_R10_O15_ABORT_SPONTAN | SA | CCR2 on CD14+ CD16+ monocyte | GCST90001992 | Simple mode | 9 | 0.502 | 0.828 | 0.488 | 1.403 |  |  |  |  |  |
| finngen_R10_O15_ABORT_SPONTAN | SA | CCR2 on CD14+ CD16+ monocyte | GCST90001992 | Weighted mode | 9 | 0.850 | 1.049 | 0.648 | 1.700 |  |  |  |  |  |
| finngen_R10_O15_ABORT_SPONTAN | SA | CD80 on granulocyte | GCST90002040 | MR Egger | 9 | 0.820 | 1.104 | 0.487 | 2.500 | 4.997 | 0.660 |  |  |  |
| finngen_R10_O15_ABORT_SPONTAN | SA | CD80 on granulocyte | GCST90002040 | Weighted median | 9 | 0.769 | 1.070 | 0.680 | 1.686 |  |  |  |  |  |
| finngen_R10_O15_ABORT_SPONTAN | SA | CD80 on granulocyte | GCST90002040 | Inverse variance weighted | 9 | 0.518 | 1.124 | 0.789 | 1.600 | 4.999 | 0.758 | 0.002 | 0.964 | 0.719 |
| finngen_R10_O15_ABORT_SPONTAN | SA | CD80 on granulocyte | GCST90002040 | Simple mode | 9 | 0.961 | 0.984 | 0.526 | 1.840 |  |  |  |  |  |
| finngen_R10_O15_ABORT_SPONTAN | SA | CD80 on granulocyte | GCST90002040 | Weighted mode | 9 | 0.988 | 1.005 | 0.533 | 1.897 |  |  |  |  |  |
| finngen_R10_O15_ABORT_SPONTAN | SA | CD45 on GR−MDSC | GCST90002047 | MR Egger | 9 | 0.288 | 2.037 | 0.606 | 6.851 | 7.201 | 0.408 |  |  |  |
| finngen_R10_O15_ABORT_SPONTAN | SA | CD45 on GR−MDSC | GCST90002047 | Weighted median | 9 | 0.334 | 1.420 | 0.697 | 2.890 |  |  |  |  |  |
| finngen_R10_O15_ABORT_SPONTAN | SA | CD45 on GR−MDSC | GCST90002047 | Inverse variance weighted | 9 | 0.676 | 1.118 | 0.663 | 1.884 | 8.385 | 0.397 | -0.053 | 0.319 | 0.407 |
| finngen_R10_O15_ABORT_SPONTAN | SA | CD45 on GR−MDSC | GCST90002047 | Simple mode | 9 | 0.839 | 1.131 | 0.359 | 3.566 |  |  |  |  |  |
| finngen_R10_O15_ABORT_SPONTAN | SA | CD45 on GR−MDSC | GCST90002047 | Weighted mode | 9 | 0.501 | 1.400 | 0.549 | 3.569 |  |  |  |  |  |
| finngen_R10_O15_ABORT_SPONTAN | SA | CD8 on HLA DR+ CD8+ T cell | GCST90002060 | MR Egger | 9 | 0.414 | 0.689 | 0.297 | 1.596 | 8.321 | 0.305 |  |  |  |
| finngen_R10_O15_ABORT_SPONTAN | SA | CD8 on HLA DR+ CD8+ T cell | GCST90002060 | Weighted median | 9 | 0.512 | 0.851 | 0.527 | 1.377 |  |  |  |  |  |
| finngen_R10_O15_ABORT_SPONTAN | SA | CD8 on HLA DR+ CD8+ T cell | GCST90002060 | Inverse variance weighted | 9 | 0.871 | 0.971 | 0.678 | 1.390 | 9.256 | 0.321 | 0.031 | 0.404 | 0.325 |
| finngen_R10_O15_ABORT_SPONTAN | SA | CD8 on HLA DR+ CD8+ T cellCD8 on HLA DR+ CD8+ T cell | GCST90002060 | Simple mode | 9 | 0.717 | 0.866 | 0.409 | 1.835 |  |  |  |  |  |
| finngen_R10_O15_ABORT_SPONTAN | SA | CD8 on HLA DR+ CD8+ T cell | GCST90002060 | Weighted mode | 9 | 0.454 | 0.797 | 0.453 | 1.402 |  |  |  |  |  |

Table S6. MR estimates, heterogeneity and horizontal pleiotropy tests of the circulating inflammatory proteins on immune cell.

| id.exposure | exposure | outcome | method | nsnp | pval | or | or_lci95 | or_uci95 | Q | Q_pval | egger_intercept | Pleiotropy_pval | MR_PRESSO  Global Test pval |
| --- | --- | --- | --- | --- | --- | --- | --- | --- | --- | --- | --- | --- | --- |
| GCST90274832 | Programmed cell death 1 ligand 1 | CD45 on GR−MDSC | MR Egger | 25 | 0.111 | 1.714 | 0.906 | 3.244 | 32.436 | 0.091 |  |  |  |
| GCST90274832 | Programmed cell death 1 ligand 1 | CD45 on GR−MDSC | Weighted median | 25 | 0.021 | 1.563 | 1.069 | 2.286 |  |  |  |  |  |
| GCST90274832 | Programmed cell death 1 ligand 1 | CD45 on GR−MDSC | Inverse variance weighted | 25 | 0.019 | 1.422 | 1.060 | 1.908 | 33.031 | 0.103 | -0.019 | 0.522 | 0123 |
| GCST90274832 | Programmed cell death 1 ligand 1 | CD45 on GR−MDSC | Simple mode | 25 | 0.059 | 1.947 | 1.008 | 3.759 |  |  |  |  |  |
| GCST90274832 | Programmed cell death 1 ligand 1 | CD45 on GR−MDSC | Weighted mode | 25 | 0.035 | 1.664 | 1.065 | 2.602 |  |  |  |  |  |
| GCST90274840 | TNF-β | Terminally Differentiated CD4-CD8- T cell | MR Egger | 34 | 0.230 | 0.948 | 0.871 | 1.032 | 37.082 | 0.246 |  |  |  |
| GCST90274840 | TNF-β | Terminally Differentiated CD4-CD8- T cell | Weighted median | 34 | 0.223 | 0.955 | 0.886 | 1.028 |  |  |  |  |  |
| GCST90274840 | TNF-β | Terminally Differentiated CD4-CD8- T cell | Inverse variance weighted | 34 | 0.027 | 0.928 | 0.868 | 0.992 | 37.876 | 0.256 | -0.001 | 0.414 | 0.333 |
| GCST90274840 | TNF-β | Terminally Differentiated CD4-CD8- T cell | Simple mode | 34 | 0.621 | 0.945 | 0.758 | 1.179 |  |  |  |  |  |
| GCST90274840 | TNF-β | Terminally Differentiated CD4-CD8- T cell | Weighted mode | 34 | 0.267 | 0.960 | 0.896 | 1.030 |  |  |  |  |  |
| GCST90274840 | TNF-β | CCR2 on CD14+ CD16+ monocyte | MR Egger | 35 | 0.093 | 0.938 | 0.872 | 1.009 | 33.158 | 0.460 |  |  |  |
| GCST90274840 | TNF-β | CCR2 on CD14+ CD16+ monocyte | Weighted median | 35 | 0.030 | 0.930 | 0.872 | 0.993 |  |  |  |  |  |
| GCST90274840 | TNF-β | CCR2 on CD14+ CD16+ monocyte | Inverse variance weighted | 35 | 0.022 | 0.935 | 0.882 | 0.990 | 33.176 | 0.508 | -0.001 | 0.894 | 0.585 |
| GCST90274840 | TNF-β | CCR2 on CD14+ CD16+ monocyte | Simple mode | 35 | 0.670 | 0.948 | 0.745 | 1.208 |  |  |  |  |  |
| GCST90274840 | TNF-β | CCR2 on CD14+ CD16+ monocyte | Weighted mode | 35 | 0.176 | 0.948 | 0.880 | 1.022 |  |  |  |  |  |

Table S7. The causal link between the circulating infammatory proteins and immune cells by Bayesian weighted Mendelian randomization (BWMR).

| exposure_id | exposure | outcome | method | beta | lci95 | uci95 | or | or_lci95 | or_uci95 | pvalue |
| --- | --- | --- | --- | --- | --- | --- | --- | --- | --- | --- |
| GCST90274832 | Programmed cell death 1 ligand 1 | CD45 on GR−MDSC | BWMR | 0.377 | 0.073 | 0.682 | 1.458 | 1.076 | 1.977 | 0.015 |
| GCST90274840 | TNF-β | Terminally Differentiated CD4-CD8- T cell | BWMR | -0.077 | -0.146 | -0.007 | 0.926 | 0.864 | 0.993 | 0.031 |
| GCST90274840 | TNF-β | CCR2 on CD14+ CD16+ monocyte | BWMR | -0.069 | -0.131 | -0.007 | 0.933 | 0.877 | 0.993 | 0.028 |

Table S8. Reverse mendelian randomization estimates the causal link between circulating infammatory proteins and immune cells.

| id.exposure | exposure | outcome | method | nsnp | pval | or | or_lci95 | or_uci95 | Q | Q_pval | egger_intercept | Pleiotropy_pval | MR_PRESSO  Global Test pval |
| --- | --- | --- | --- | --- | --- | --- | --- | --- | --- | --- | --- | --- | --- |
| GCST90002047 | CD45 on GR−MDSC | Programmed cell death 1 ligand 1 | MR Egger | 18 | 0.596 | 1.018 | 0.954 | 1.086 | 20.139 | 0.214 |  |  |  |
| GCST90002047 | CD45 on GR−MDSC | Programmed cell death 1 ligand 1 | Weighted median | 18 | 0.801 | 0.995 | 0.955 | 1.036 |  |  |  |  |  |
| GCST90002047 | CD45 on GR−MDSC | Programmed cell death 1 ligand 1 | Inverse variance weighted | 18 | 0.920 | 1.002 | 0.973 | 1.031 | 20.531 | 0.247 | -0.005 | 0.585 | 0.281 |
| GCST90002047 | CD45 on GR−MDSC | Programmed cell death 1 ligand 1 | Simple mode | 18 | 0.930 | 1.003 | 0.937 | 1.074 |  |  |  |  |  |
| GCST90002047 | CD45 on GR−MDSC | Programmed cell death 1 ligand 1 | Weighted mode | 18 | 0.959 | 0.999 | 0.951 | 1.049 |  |  |  |  |  |
| GCST90001573 | Terminally Differentiated CD4-CD8- T cell | TNF-β | MR Egger | 28 | 0.213 | 0.986 | 0.966 | 1.007 | 25.904 | 0.468 |  |  |  |
| GCST90001573 | Terminally Differentiated CD4-CD8- T cell | TNF-β | Weighted median | 28 | 0.416 | 0.989 | 0.962 | 1.016 |  |  |  |  |  |
| GCST90001573 | Terminally Differentiated CD4-CD8- T cell | TNF-β | Inverse variance weighted | 28 | 0.119 | 0.986 | 0.968 | 1.004 | 25.935 | 0.522 | -0.001 | 0.860 | 0.630 |
| GCST90001573 | Terminally Differentiated CD4-CD8- T cell | TNF-β | Simple mode | 28 | 0.533 | 0.984 | 0.934 | 1.035 |  |  |  |  |  |
| GCST90001573 | Terminally Differentiated CD4-CD8- T cell | TNF-β | Weighted mode | 28 | 0.140 | 0.984 | 0.963 | 1.005 |  |  |  |  |  |
| GCST90001992 | CCR2 on CD14+ CD16+ monocyte | TNF-β | MR Egger | 37 | 0.918 | 1.001 | 0.980 | 1.022 | 47.893 | 0.072 |  |  |  |
| GCST90001992 | CCR2 on CD14+ CD16+ monocyte | TNF-β | Weighted median | 37 | 0.315 | 1.012 | 0.989 | 1.035 |  |  |  |  |  |
| GCST90001992 | CCR2 on CD14+ CD16+ monocyte | TNF-β | Inverse variance weighted | 37 | 0.473 | 1.006 | 0.989 | 1.024 | 48.980 | 0.073 | 0.005 | 0.379 | 0.097 |
| GCST90001992 | CCR2 on CD14+ CD16+ monocyte | TNF-β | Simple mode | 37 | 0.539 | 1.010 | 0.978 | 1.044 |  |  |  |  |  |
| GCST90001992 | CCR2 on CD14+ CD16+ monocyte | TNF-β | Weighted mode | 37 | 0.536 | 1.006 | 0.987 | 1.025 |  |  |  |  |  |

| Exposure | Mediator | Outcome | Total effect | Direct effect | beta A | beta B | Mediation effect | Mediation proportion |
| --- | --- | --- | --- | --- | --- | --- | --- | --- |
| PDL1 | GR-MDSC | spontaneous abortion | -0.083 | -0.072 | 0.352 | -0.033 | -0.012 | 14.05% |
| TNF-β | Terminally Differentiated CD4-CD8- T cell | spontaneous abortion | -0.036 | -0.034 | -0.075 | 0.028 | -0.002 | 5.81% |
| TNF-β | CCR2 on CD14+ CD16+ monocyte | spontaneous abortion | -0.036 | -0.036 | -0.067 | -0.0003 | -1.96E-5 | 0.55% |

Table S9. Mediation effect of circulating inflammatory proteins via peripheral immune cells on spontaneous abortion.
